# Supplementary material
Source: PubMed Central journal article supplement (PMC5042670)
Supplement: ASN.2015091055SupplementaryData.pdf [file ASN.2015091055SupplementaryData.pdf]

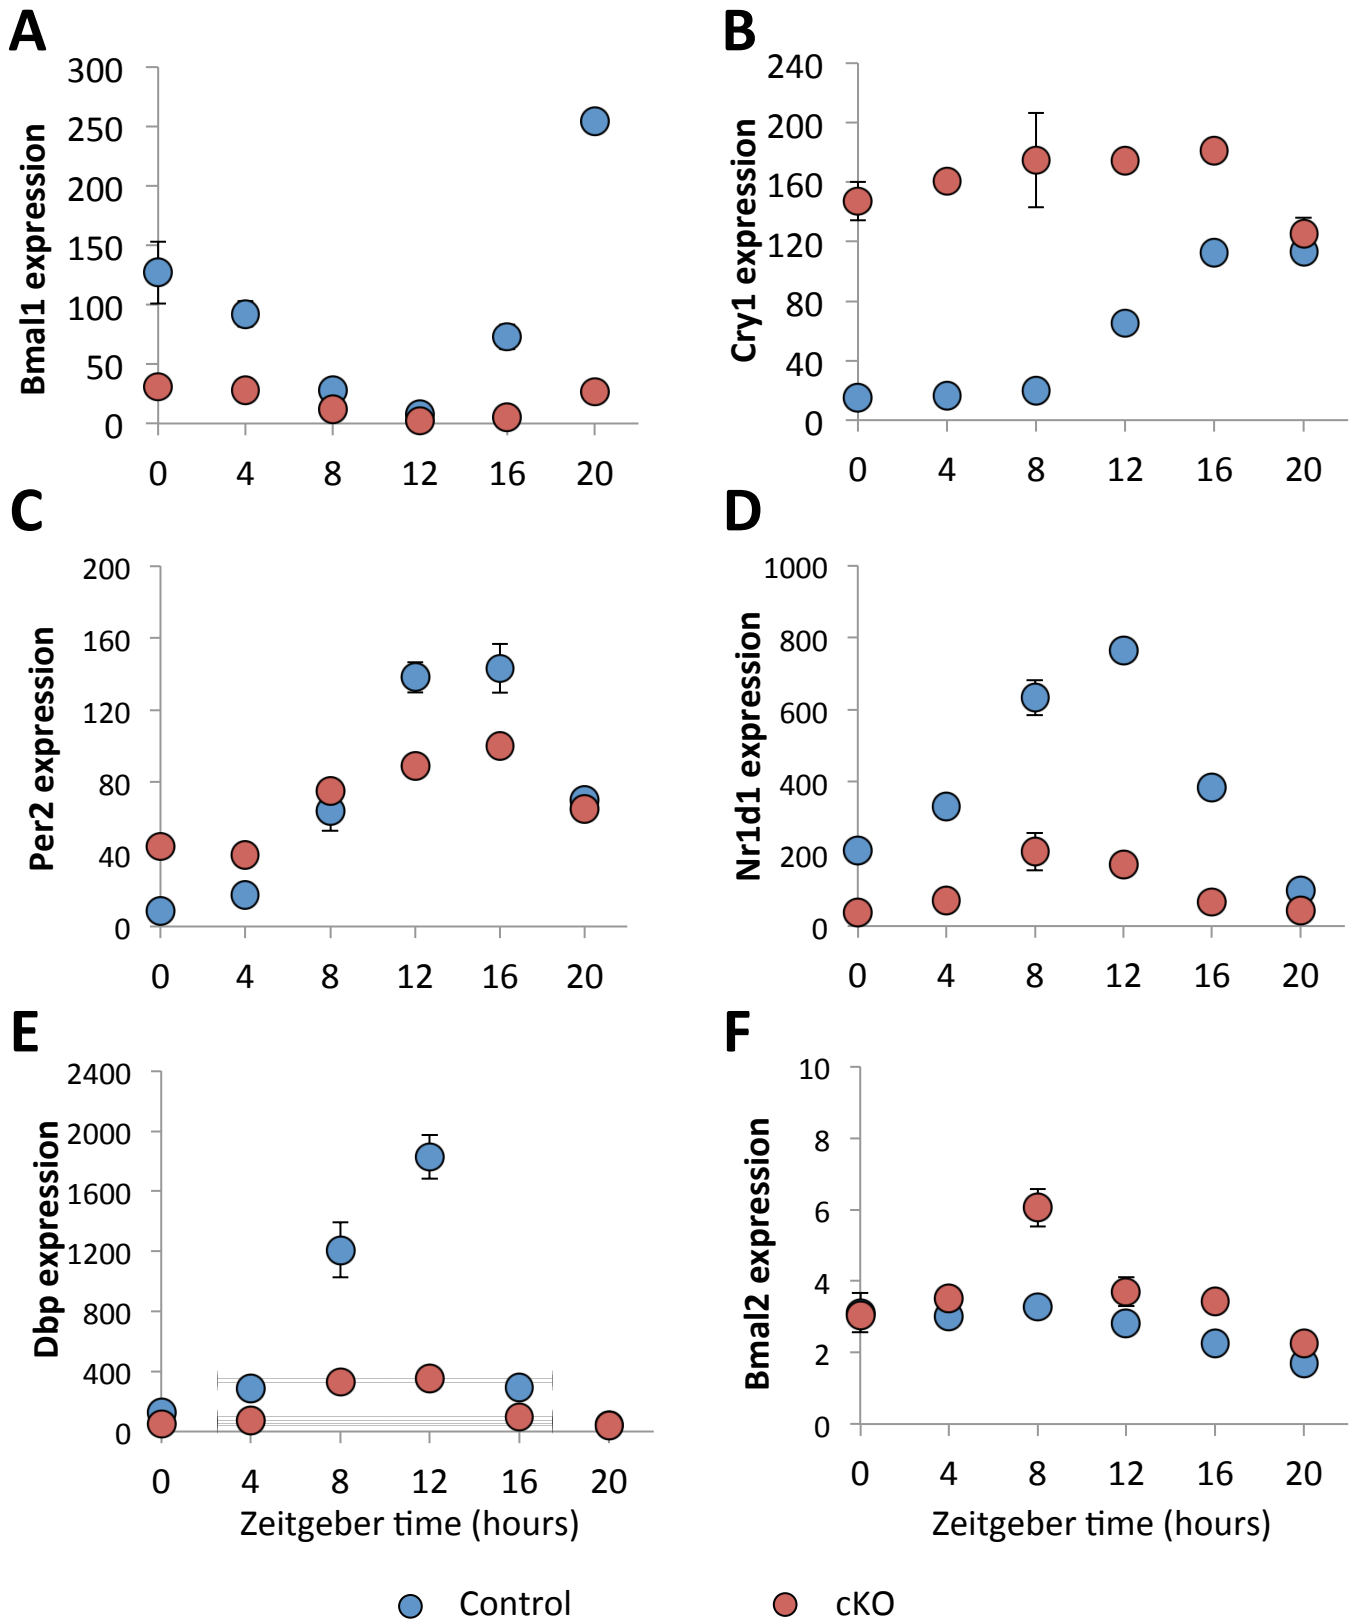

**Supplemental Figure 1.** qPCR analysis of Bmal1 (A), Cry1 (B), Per2 (C), Nr1d1 (D), Dbp (E) and Bmal2 (F) mRNA expression in kidneys of Control and cKO mice. n=6 for both genotypes. Error bars represent SEM. Data are expressed in arbitrary units and are standardized to Dbp expression levels in kidneys of Control animals at ZT0.

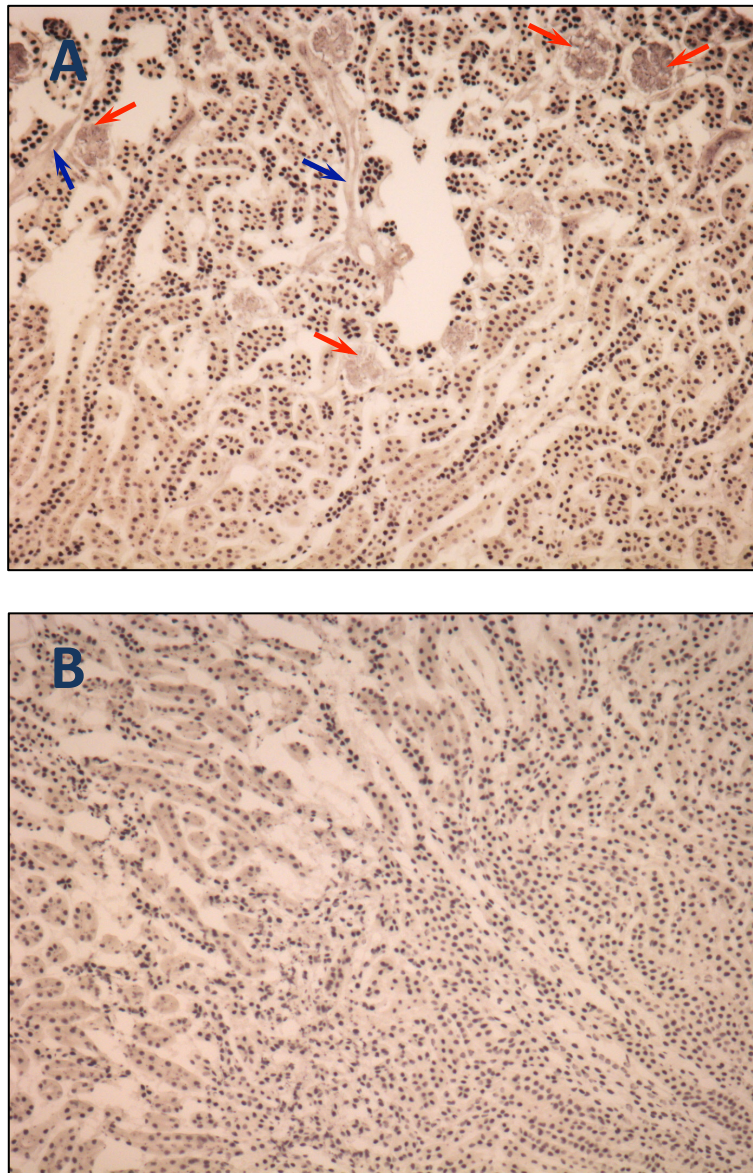

**Supplemental Figure 2.** Immunohistochemical localization of CRE recombinase in kidney cortex (**A**) and medulla (**B**) of cKO mice treated 5 days with DOX (2 mg/ml in drinking water). The anti-CRE recombinase antibody was from Novagen. These images show that the CRE is ubiquitously expressed in the nuclei of all renal tubular cells but not in glomeruli (red arrow) or blood vessels (blue arrow).

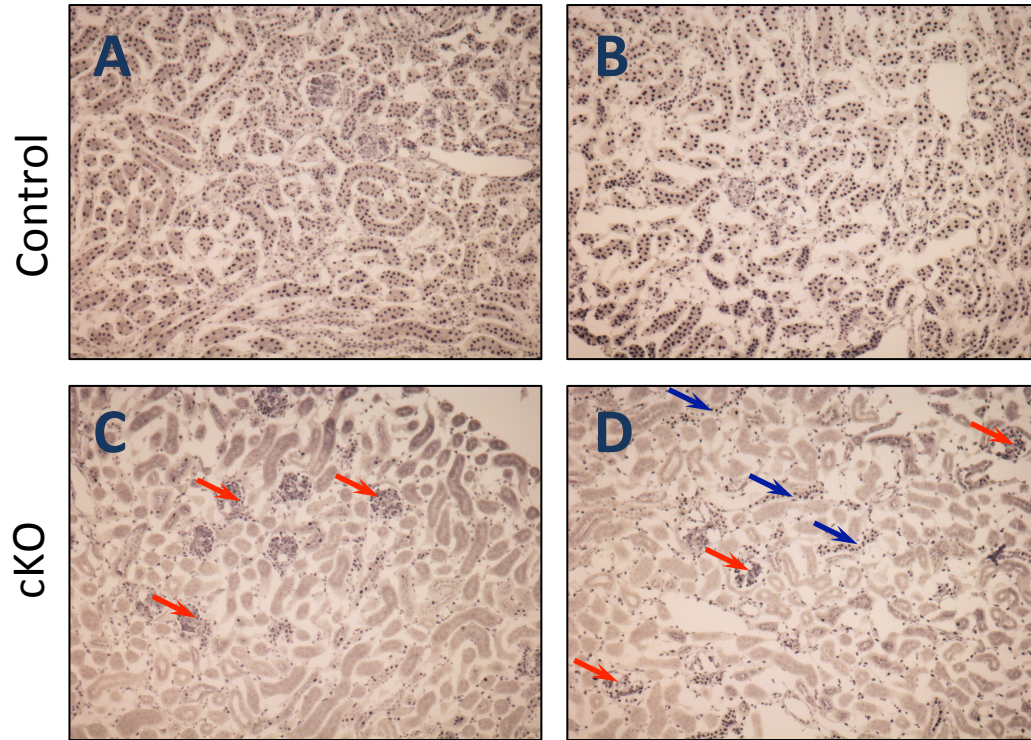

**Supplemental Figure 3.** Immunohistochemical localization of BMAL1 in kidney cortex of Control or cKO mice treated with DOX (2 mg/ml in drinking water). **(A)** Control mice treated 5 days with DOX. **(B)** Control mice 2 months after the end of DOX treatment. **(C)** cKO mice treated 5 days with DOX. **(D)** cKO mice 2 months after the end of DOX treatment. The anti-BMAL1 antibody was described elsewhere (12). These images show ubiquitous nuclear BMAL1 staining in kidneys of Control mice. In cKO mice, the BMAL1 expression disappeared all along the renal tubule but not in glomeruli (red arrow) or blood vessels (blue arrow).



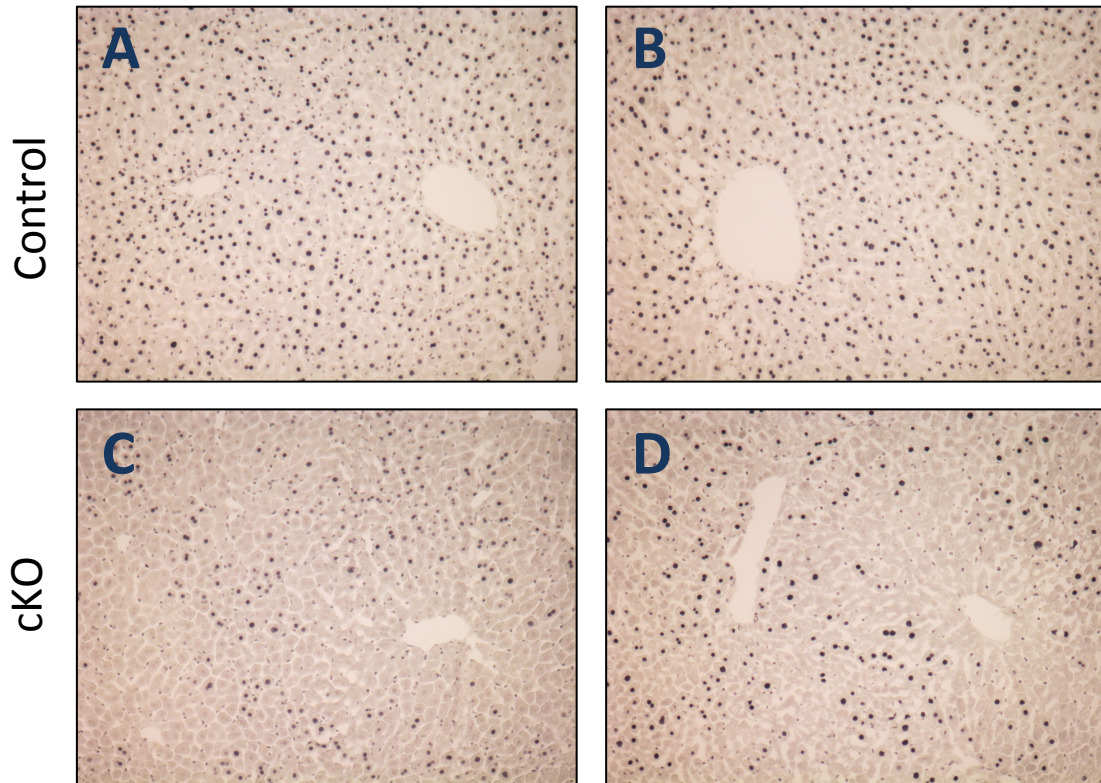

**Supplemental Figure 4.** Immunohistochemical localization of BMAL1 in the liver of Control or cKO mice treated with DOX (2 mg/ml in drinking water). **(A)** Control mice treated 5 days with DOX. **(B)** Control mice 2 months after the end of DOX treatment. **(C)** cKO mice treated 5 days with DOX. **(D)** cKO mice 2 months after the end of DOX treatment. The anti-BMAL1 antibody was described elsewhere (12). These images show that BMAL1 is inactivated in some proportion of liver cells located in the vicinity of the large blood vessels.

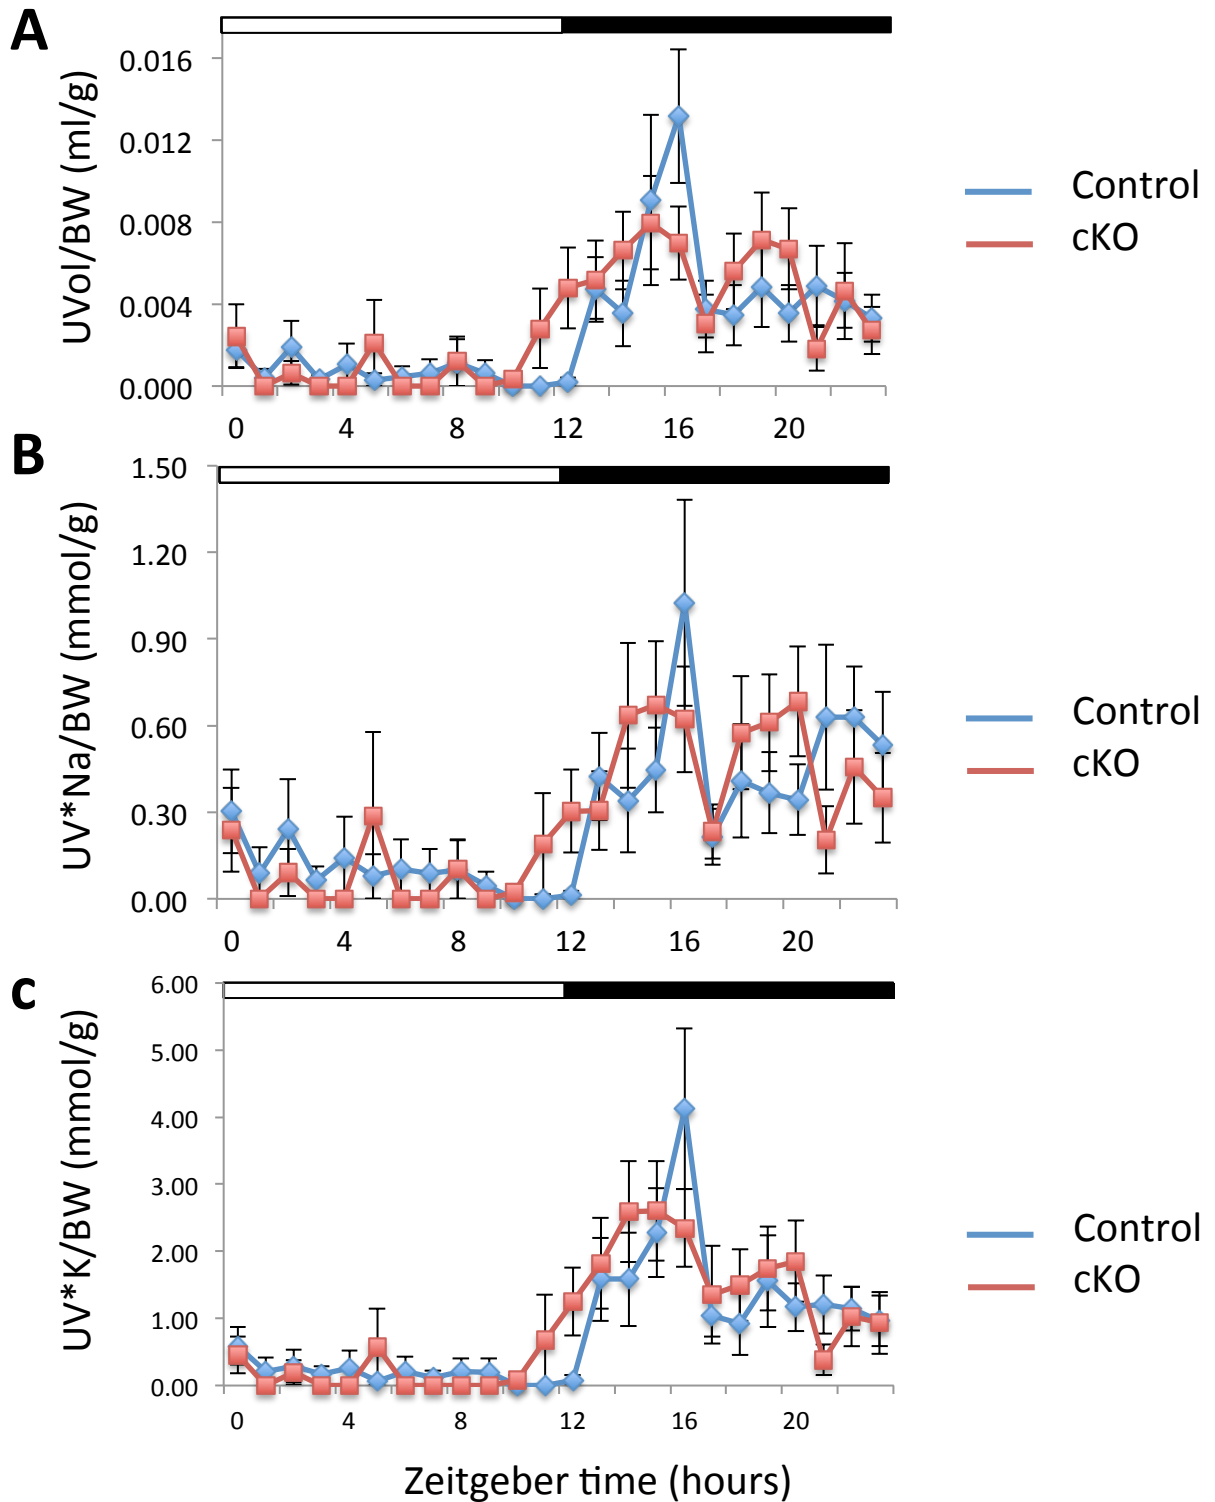

**Supplemental Figure 5.** Circadian patterns of renal water (A), sodium (B) and potassium (C) excretion in Control (blue line) and cKO mice (red line) in **light/dark** conditions. The hourly urine collection was performed in metabolic cages. The experiment was performed on Control and cKO mice 2 months after the end of DOX treatment. Two way ANOVA did not reveal the effect of genotype (Control vs. cKO:  $P=0.63$  for water,  $P=0.99$  for sodium and  $P=0.57$  for potassium).  $n=12$  for both genotypes. Error bars represent SEM.

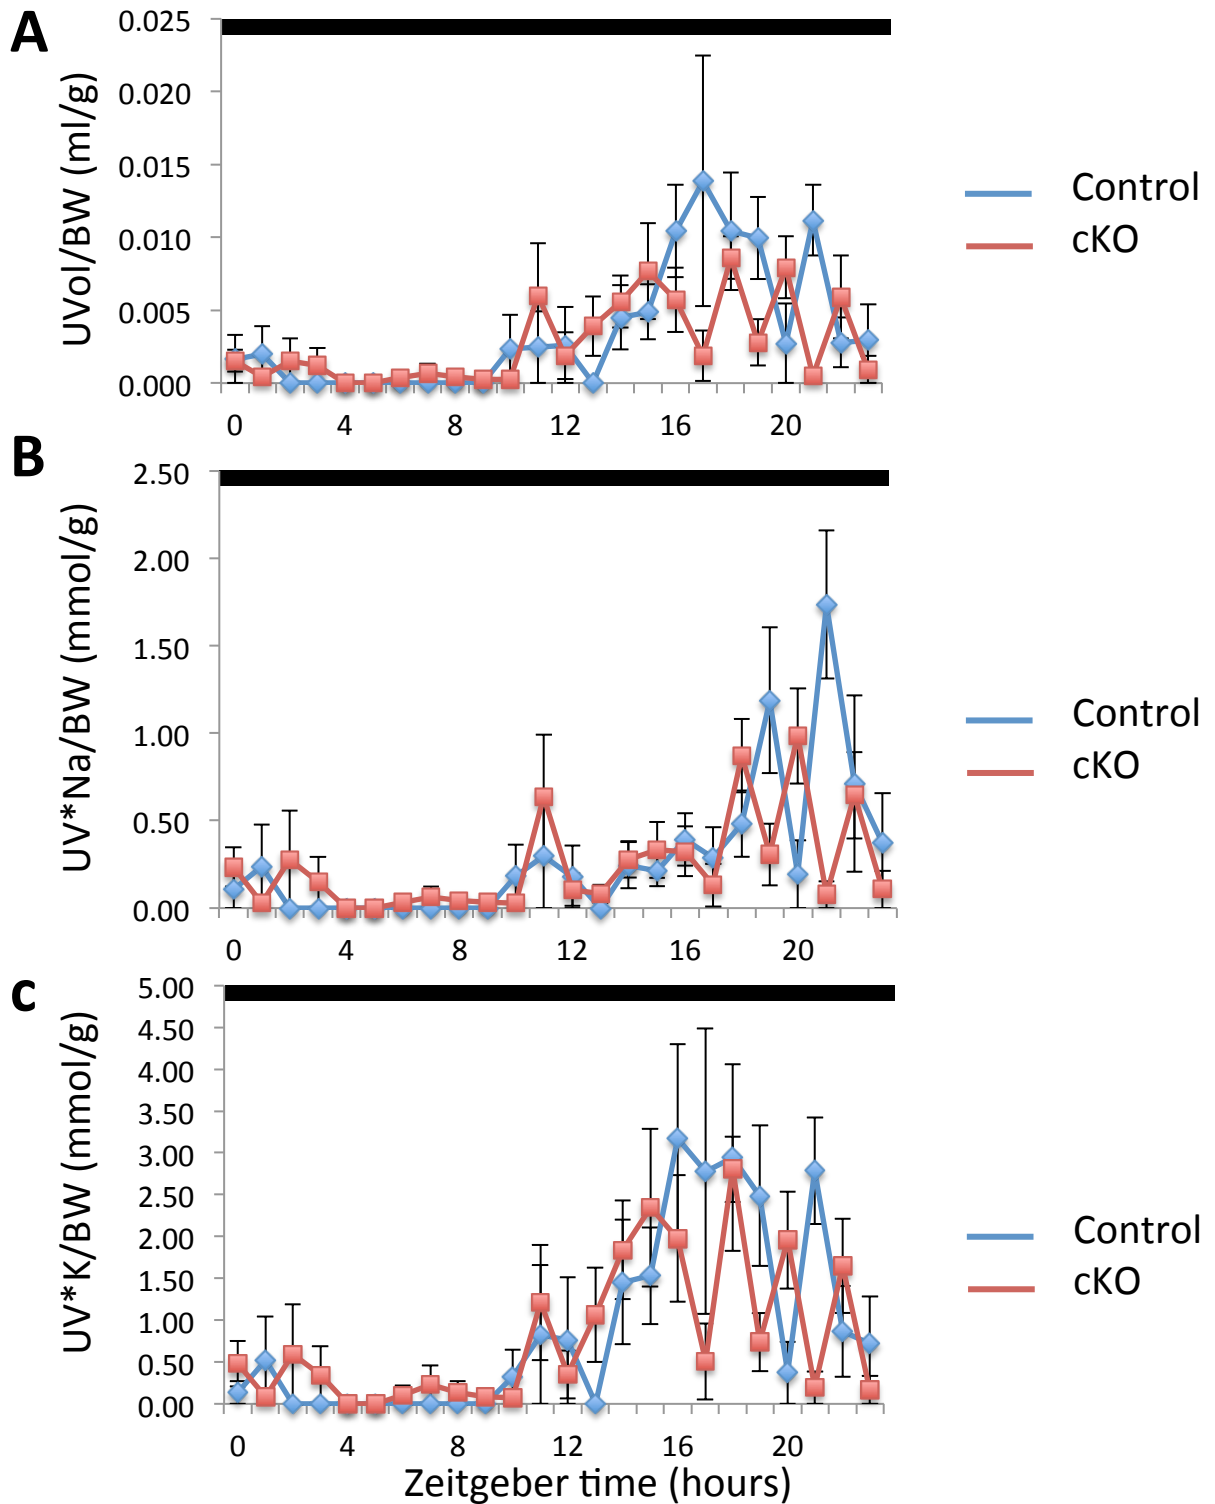

**Supplemental Figure 6.** Circadian patterns of renal water (A), sodium (B) and potassium (C) excretion in Control (blue line) and cKO mice (red line) in **dark/dark** conditions. The hourly urine collection was performed in metabolic cages. The experiment was performed on Control and cKO mice 2 months after the end of DOX treatment. Animals were placed in constant darkness 30 hours before urine collection. Two way ANOVA did not reveal the effect of genotype (Control vs. cKO:  $P=0.23$  for water,  $P=0.45$  for sodium and  $P=0.50$  for potassium).  $n=6$  for both genotypes. Error bars represent SEM.

**A**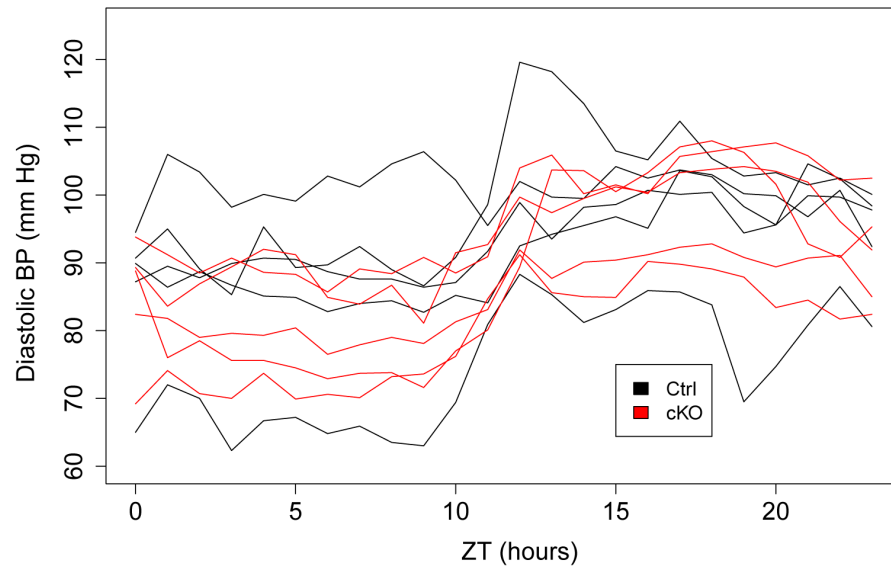**B**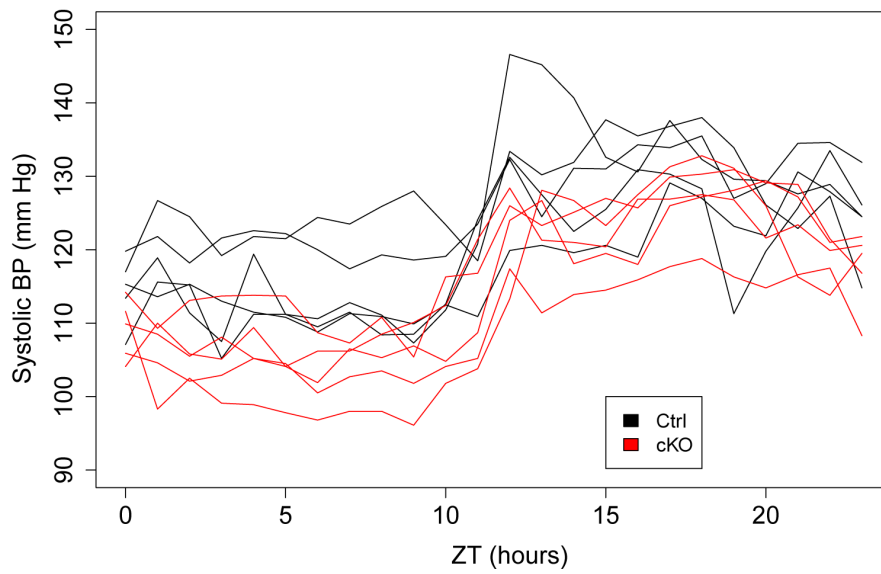

**Supplemental Figure 7.** Telemetry records of (A) Diastolic and (B) systolic BP from 5 Control and 5 cKO mice. For each mouse, each record represent a mean of 7-day recordings. See statistical treatment of the data in Table S2.

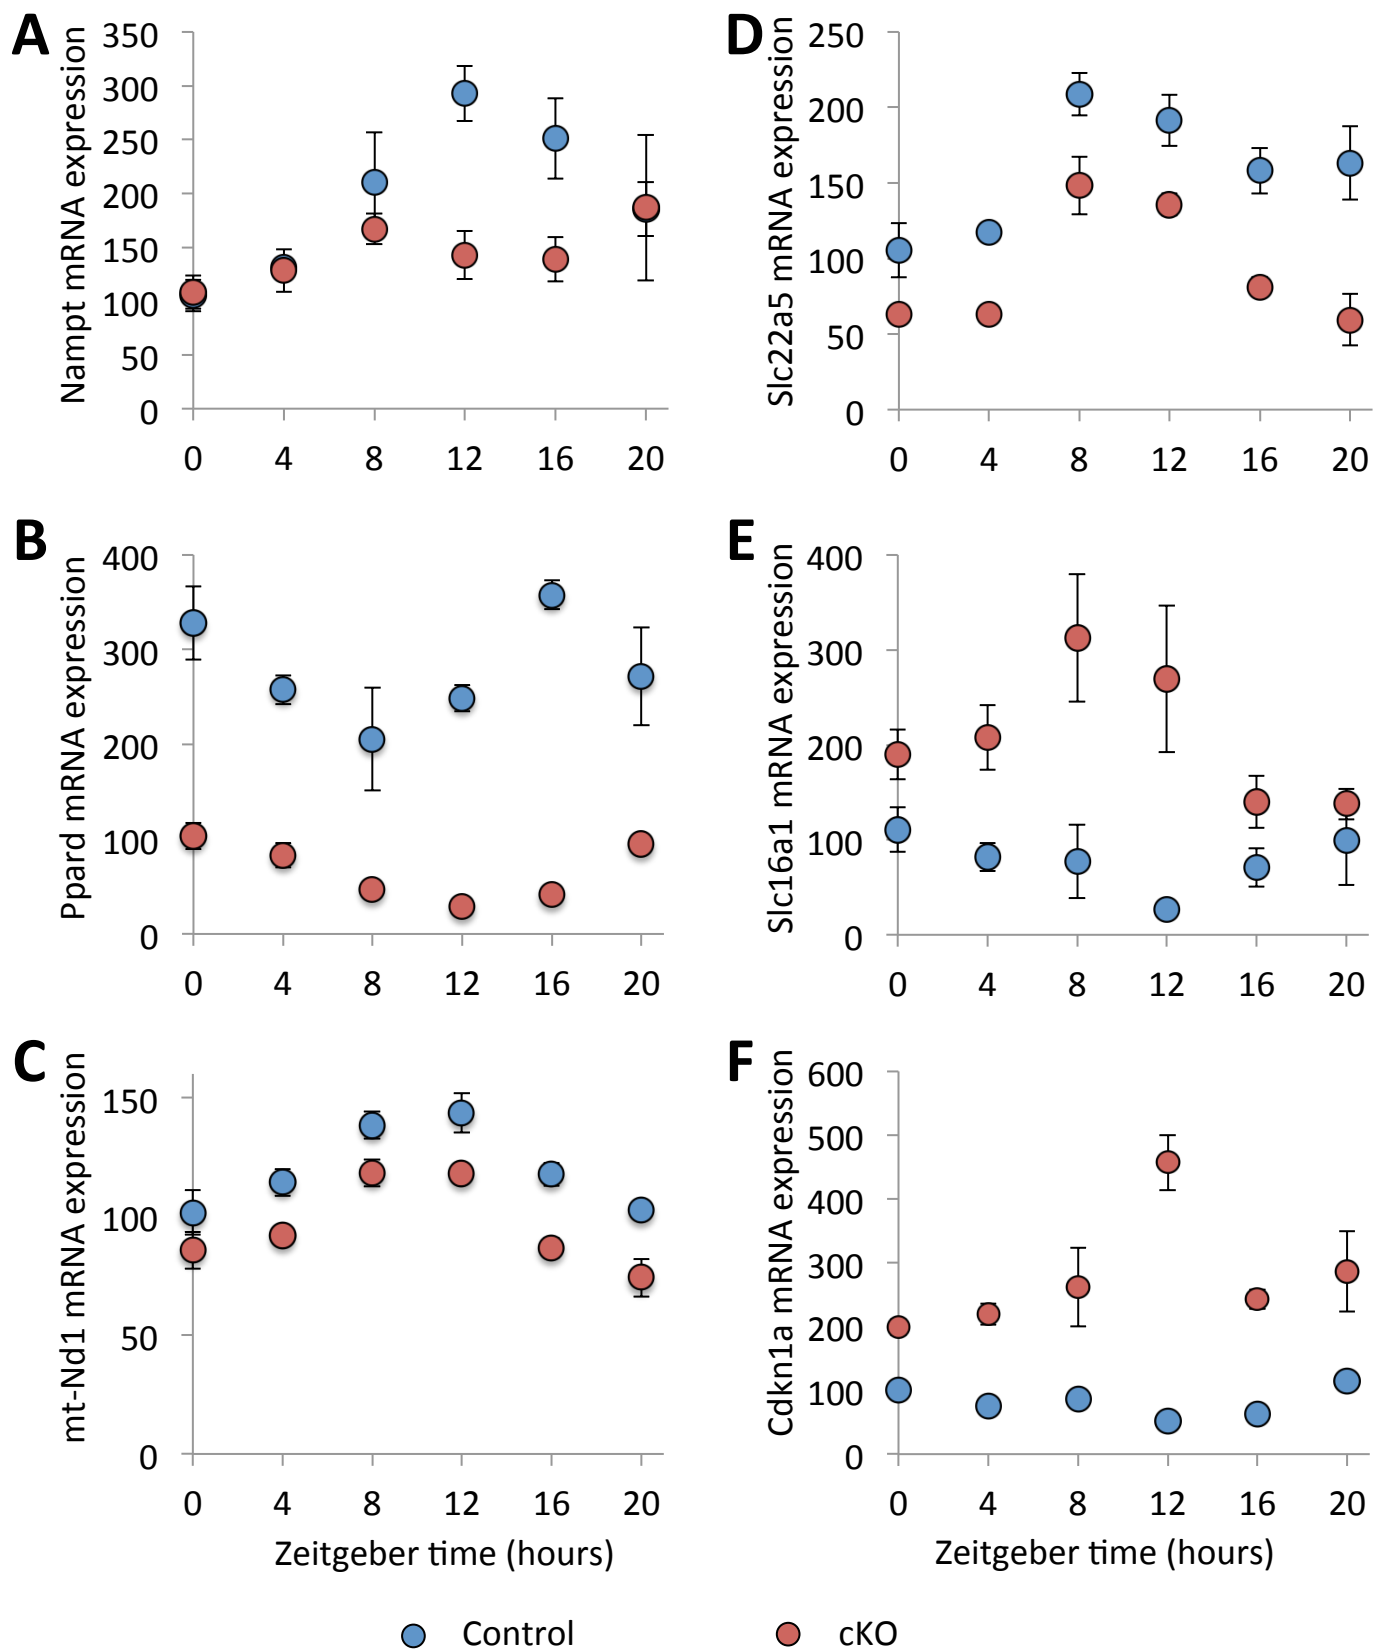

**Supplemental Figure 8.** qPCR analysis of Nampt (A), Ppard (B), mt-Nd1 (C), Slc22a5 (D), Slc16a1 (E) and Cdkn1a (F) mRNA expression in kidneys of Control and cKO mice. n=6 for both genotypes. Error bars represent SEM.



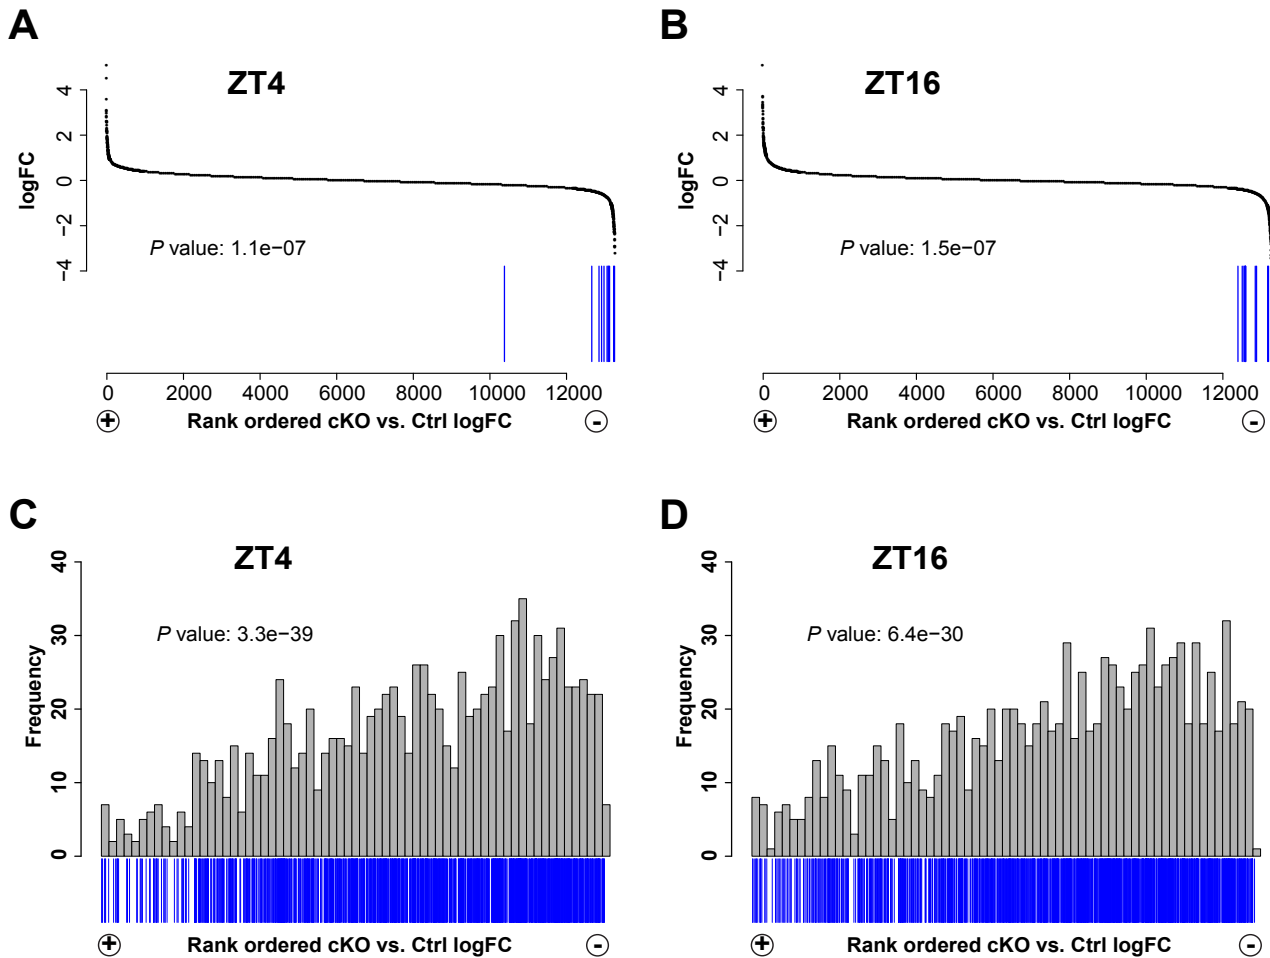

**Supplemental Figure 9.** Protein coding genes with at least 1 count per million in at least one sample were ordered by their log fold-change (logFC) of the difference between Control and cKO animals at ZT4 (**A,C**) or ZT16 (**B,D**) from the highest logFC on the left to the lowest logFC on the right. (**A-B**) Ordered logFC values (black dots) with positions of the mitochondrial DNA (mt-DNA) genes in the rank indicated by the blue tick marks. (**C-D**) The logFC ordered genes were binned into 50 bins. For each time point, the histogram displays the number of nuclear genes with mitochondrial localization (mt-localized) in each bin. The 1158 nuclear genes with mitochondrial localization were obtained from MitoCarta (<http://www.broadinstitute.org/scientific-community/science/programs/metabolic-disease-program/mitocarta/mitocarta-inv>). We tested the assumption that mt-DNA (**A-B**) or mt-localized (**C-D**) genes were uniformly distributed along the logFC ordered genes using a two-tailed Mann-Whitney U test. The assumption of uniform distribution was rejected, indicating an overrepresentation of mt-DNA and mt-localized genes among down-regulated genes in Bmal1 KO.

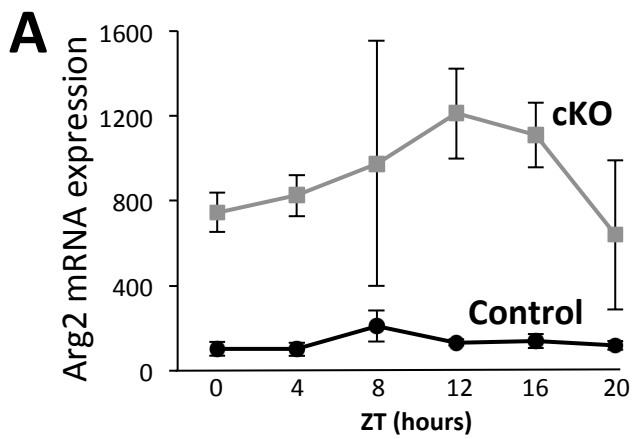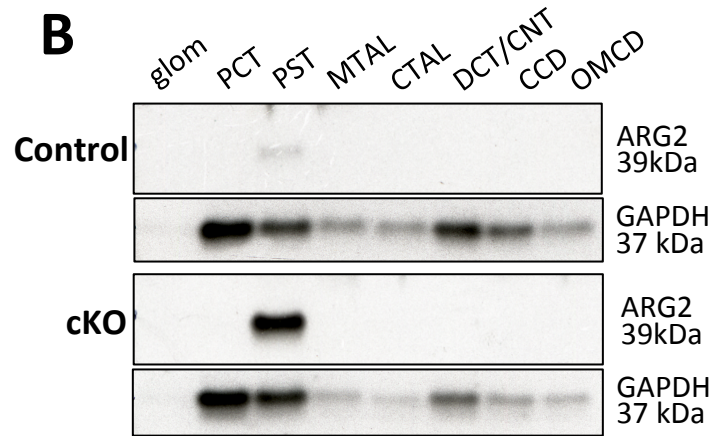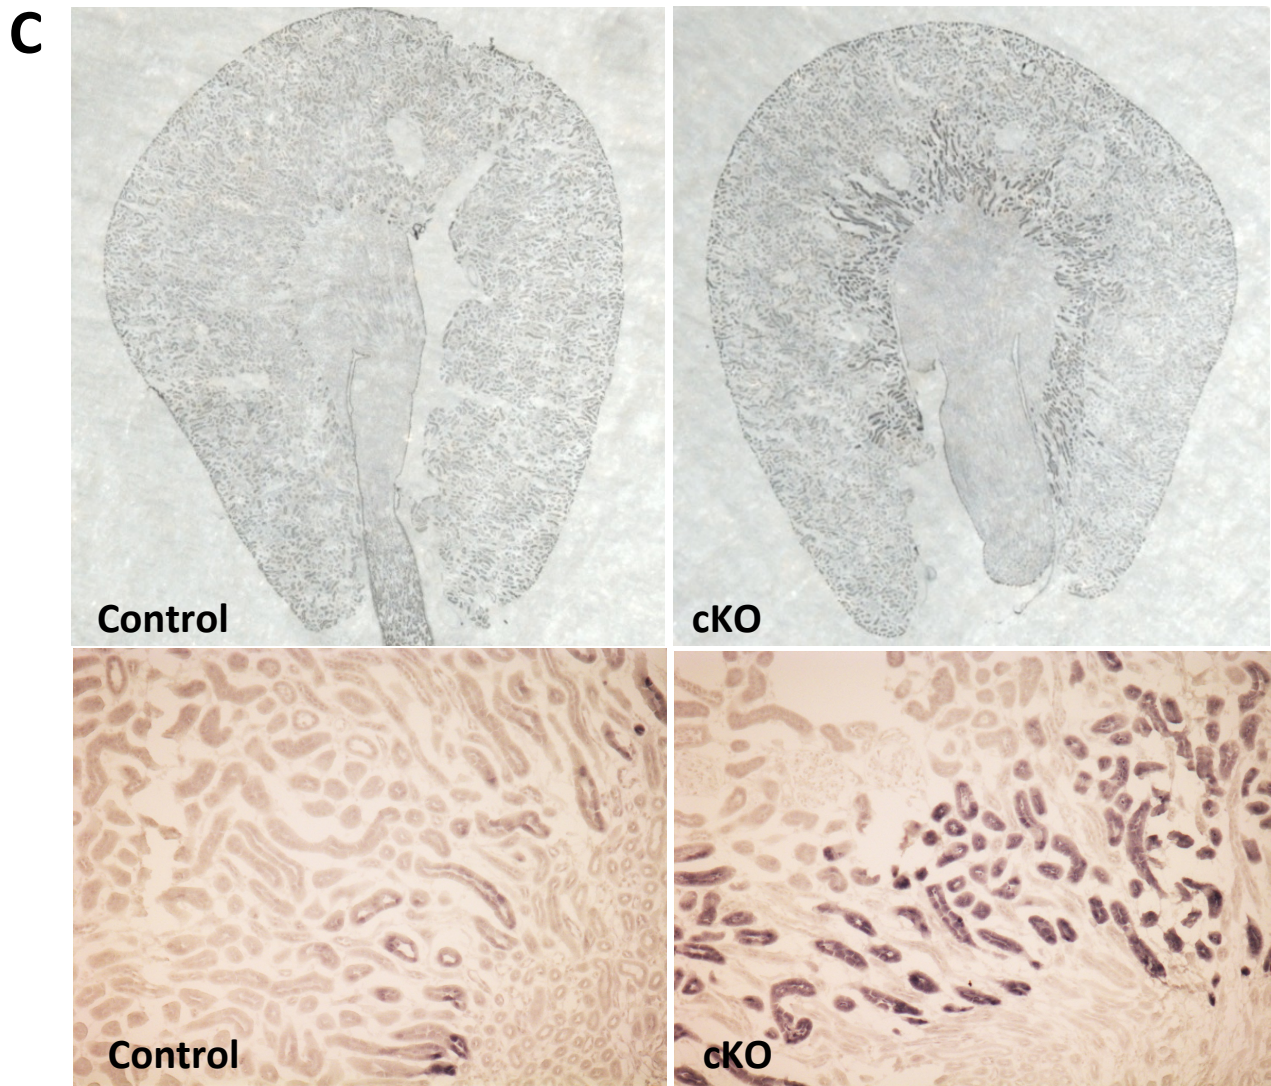

**Supplemental Figure 10.** Arginase 2 expression in kidneys of Control and cKO mice. **A.** Circadian pattern of Arg2 mRNA expression in kidneys of Control and cKO mice. Arbitrary units, Arg2 mRNA levels in kidneys of Control mice at ZT0 were considered as 100%. Mean±SD, n=6. **B.** ARG2 Western probing performed on microdissected tubular segments (10 mm/segment) or 10 glomeruli. **C.** Immunohistochemical ARG2 localization in kidneys of Control and cKO mice.

## Supplemental Methods.

**Gene expression analysis by RNASeq** RNA-seq libraries were prepared using 500 ng of total RNA and the Illumina TruSeq Stranded mRNA reagents (Illumina; San Diego, California, USA) on a Caliper Sciclone liquid handling robot (PerkinElmer; Waltham, Massachusetts, USA) using a Caliper-developed automated script. Cluster generation was performed with the resulting libraries using the Illumina HiSeq PE Cluster Kit v3 reagents and sequenced on the Illumina HiSeq 2500 using HiSeq SBS Kit v3 reagents. Sequencing data were processed using the Illumina Pipeline Software version 1.82. Purity-filtered reads were adapters and quality trimmed with Cutadapt (v. 1.3.) and filtered for low complexity with PRINSEQ (v. 0.20.3.) (1). Reads were aligned against *Mus musculus GRCh38* genome using Tophat (v. 2.0.9) (2). Quality of the RNASeq data alignment was assessed using RSeQC (v. 2.3.7, RSeQC (v. 2.3.7, (3)). The number of read counts per gene locus was summarized with htseq-count (v. 0.6.1) using *Mus musculus GRCh38.75* gene annotation (4). Data was further processed in R (v. 3.1.2), using Bioconductor packages. The 13,279 protein coding genes with at least 1 count per million in at least one sample were normalized with scaling factors computed by the TMM method (Bioconductor package *edgeR*, (5)) and subsequently transformed to log<sub>2</sub>-counts per million by voom, a method implemented in the R Bioconductor package *limma* (6). Differences in gene expression levels between KO and WT animals at ZT4 and ZT16 were combined into one F-test using the *limma* package (7). Statistically significant genes (False Discovery Rate < 5%) were classified for being affected at ZT4, ZT16 or at both time points using the nestedF method from *limma*. Gene Ontology (GO) analysis was performed using GOrilla using all protein coding genes from *Mus musculus GRCh38.75* as background list (8). Significant enriched biological processes GO terms were identified after Bonferroni correction ( $P$  value < 3.68e-06). GO terms that were not at least 4 levels above the root node were discarded (generic terms). Enriched GO terms

representation was generated using REVIGO (9). The complete data set is publicly available at GEO through the accession number GSE76838.

**NOS activity**            Mouse kidneys were homogenized in 10 volumes (w/v) of solution containing 250 mM sucrose, 1 mM EDTA and protease inhibitors cocktail (Roche), pH 7.7. The homogenate was centrifuged at 14000 rpm, +4°C, 20 min. The supernatant was collected and 5 ml were incubated in 50 ml of reaction mixture containing 2 mM CaCl<sub>2</sub>, 1 mM NADPH, 25 μM FAD, 1.25 μg/ml calmodulin, 10 μM BH<sub>4</sub>, and 0.5 μl of [<sup>14</sup>C]-L-Arginine (100 μCi/ml), 20 mM HEPES, pH 7.2, 1h at 37°C (10). The reaction was stopped by adding of 200 μl acetone. The samples were incubated overnight at -20°C for protein precipitation. The proteins were removed by centrifugation at 14000 rpm, +4°C for 20 min. The supernatants were collected and dried in vacuum. The dried samples were dissolved in 25 μl methanol:water (2:1, v/v) (11). 5 μl of dissolved samples were applied to silica gel TLC plates (Sigma) along with *L*-citrulline and *L*-arginine standards, and TLC was performed in C<sub>2</sub>H<sub>5</sub>OH : 25% NH<sub>4</sub>OH (2:3, v/v). The standards spots were visualized after treatment the silica gel with 0.25% ninhydrin prepared in acetone, the plate areas corresponding to *L*-citrulline were processed for the determination of radioactivity. NOS-specific *L*-citrulline formation was determined as the difference between samples containing 2 mM *L*-NAME and samples without *L*-NAME.

## References

1. Schmieder, R., and Edwards, R. 2011. Fast identification and removal of sequence contamination from genomic and metagenomic datasets. *PLoS One* 6:e17288.
2. Kim, D., Pertea, G., Trapnell, C., Pimentel, H., Kelley, R., and Salzberg, S.L. 2013. TopHat2: accurate alignment of transcriptomes in the presence of insertions, deletions and gene fusions. *Genome Biol* 14:R36.
3. Wang, L., Wang, S., and Li, W. 2012. RSeQC: quality control of RNA-seq experiments. *Bioinformatics* 28:2184-2185.

4. Anders, S., Pyl, P.T., and Huber, W. 2015. HTSeq--a Python framework to work with high-throughput sequencing data. *Bioinformatics* 31:166-169.
5. Robinson, M.D., and Oshlack, A. 2010. A scaling normalization method for differential expression analysis of RNA-seq data. *Genome Biol* 11:R25.
6. Law, C.W., Chen, Y., Shi, W., and Smyth, G.K. 2014. voom: Precision weights unlock linear model analysis tools for RNA-seq read counts. *Genome Biol* 15:R29.
7. Wettenhall, J.M., and Smyth, G.K. 2004. limmaGUI: a graphical user interface for linear modeling of microarray data. *Bioinformatics* 20:3705-3706.
8. Eden, E., Navon, R., Steinfeld, I., Lipson, D., and Yakhini, Z. 2009. GOrilla: a tool for discovery and visualization of enriched GO terms in ranked gene lists. *BMC Bioinformatics* 10:48.
9. Supek, F., Bosnjak, M., Skunca, N., and Smuc, T. 2011. REVIGO summarizes and visualizes long lists of gene ontology terms. *PLoS One* 6:e21800.
10. Wu, F., Park, F., Cowley, A.W., Jr., and Mattson, D.L. 1999. Quantification of nitric oxide synthase activity in microdissected segments of the rat kidney. *Am J Physiol* 276:F874-881.
11. Venkatakrisnan, P., Nakayasu, E.S., Almeida, I.C., and Miller, R.T. 2010. Arginase activity in mitochondria--An interfering factor in nitric oxide synthase activity assays. *Biochem Biophys Res Commun* 394:448-452.



**Supplemental Table 1. Analysis of variance of plasma parameters in Control and cKO mice.**

**osmolality**

| Factor        | Df | Sum Sq | Mean Sq | F value | Pr(>F)  |
|---------------|----|--------|---------|---------|---------|
| Genotype      | 1  | 37.5   | 37.5    | 1.2879  | 0.26985 |
| Time          | 1  | 24     | 24      | 0.8243  | 0.37474 |
| Genotype*Time | 1  | 121.5  | 121.5   | 4.1729  | 0.05448 |

**Na+**

| Factor        | Df | Sum Sq | Mean Sq | F value | Pr(>F)       |
|---------------|----|--------|---------|---------|--------------|
| Genotype      | 1  | 0.094  | 0.094   | 0.0148  | 0.9044       |
| Time          | 1  | 250.26 | 250.26  | 39.4758 | 3.91E-06 *** |
| Genotype*Time | 1  | 2.344  | 2.344   | 0.3697  | 0.55         |

**K+**

| Factor        | Df | Sum Sq | Mean Sq | F value | Pr(>F)      |
|---------------|----|--------|---------|---------|-------------|
| Genotype      | 1  | 0.0938 | 0.09375 | 0.4817  | 0.495639    |
| Time          | 1  | 1.815  | 1.815   | 9.3256  | 0.006267 ** |
| Genotype*Time | 1  | 0.0038 | 0.00375 | 0.0193  | 0.89099     |

**Ca2+**

| Factor        | Df | Sum Sq   | Mean Sq  | F value | Pr(>F)       |
|---------------|----|----------|----------|---------|--------------|
| Genotype      | 1  | 0.000067 | 0.000067 | 0.0197  | 0.8898       |
| Time          | 1  | 0.160067 | 0.160067 | 47.2638 | 1.12E-06 *** |
| Genotype*Time | 1  | 0.001667 | 0.001667 | 0.4921  | 0.4911       |

**Mg2+**

| Factor        | Df | Sum Sq   | Mean Sq  | F value | Pr(>F)    |
|---------------|----|----------|----------|---------|-----------|
| Genotype      | 1  | 0.026667 | 0.026667 | 4.4593  | 0.04749 * |
| Time          | 1  | 0.0096   | 0.0096   | 1.6054  | 0.2197    |
| Genotype*Time | 1  | 0.011267 | 0.011267 | 1.8841  | 0.18507   |

**creatinine**

| Factor        | Df | Sum Sq  | Mean Sq | F value  | Pr(>F)       |
|---------------|----|---------|---------|----------|--------------|
| Genotype      | 1  | 248.909 | 248.909 | 3.30E+01 | 1.92E-05 *** |
| Time          | 1  | 57.614  | 57.614  | 7.63E+00 | 0.01283 *    |
| Genotype*Time | 1  | 3.941   | 3.941   | 0.522    | 0.47928      |

**glucose**

| Factor        | Df | Sum Sq | Mean Sq | F value | Pr(>F) |
|---------------|----|--------|---------|---------|--------|
| Genotype      | 1  | 0.37   | 0.375   | 0.0165  | 0.8991 |
| Time          | 1  | 1.4    | 1.4017  | 0.0617  | 0.8064 |
| Genotype*Time | 1  | 4.34   | 4.335   | 0.1908  | 0.6669 |

**PO4**

| Factor        | Df | Sum Sq  | Mean Sq  | F value | Pr(>F) |
|---------------|----|---------|----------|---------|--------|
| Genotype      | 1  | 0.1176  | 0.1176   | 1.1822  | 0.2898 |
| Time          | 1  | 0.16007 | 0.160067 | 1.6091  | 0.2192 |
| Genotype*Time | 1  | 0.0294  | 0.0294   | 0.2956  | 0.5927 |

**urea**

| Factor        | Df | Sum Sq | Mean Sq | F value | Pr(>F)       |
|---------------|----|--------|---------|---------|--------------|
| Genotype      | 1  | 28.602 | 28.6017 | 15.1412 | 0.000907 *** |
| Time          | 1  | 14.415 | 14.415  | 7.631   | 0.012013 *   |
| Genotype*Time | 1  | 0.002  | 0.0017  | 0.0009  | 0.976598     |

**aldosterone**

| Factor        | Df | Sum Sq | Mean Sq | F value | Pr(>F)     |
|---------------|----|--------|---------|---------|------------|
| Genotype      | 1  | 40615  | 40615   | 2.3703  | 0.13934    |
| Time          | 1  | 250656 | 250656  | 14.6282 | 0.00106 ** |
| Genotype*Time | 1  | 1166   | 1166    | 0.0681  | 0.79685    |

2-way ANOVA was performed with genotype (Control, *cKO*), time (ZT4 and ZT16) and interaction between time and genotype as factors.

P values are indicated in figure legends. A P value less than 0.05 was considered significant.

**Supplemental Table 2.** Diastolic (A) and Systolic (B) BP in Control and cKO mice n analysis of

variance **A. Diastolic Blood Pressure light phase vs. dark phase**

| Factor        | Df | Sum Sq  | Mean Sq | F value | Pr(>F)    |
|---------------|----|---------|---------|---------|-----------|
| Genotype      | 1  | 52.62   | 52.62   | 2.8803  | 0.1281067 |
| Time          | 1  | 806.77  | 806.77  | 44.1576 | 0.0001616 |
| Animal        | 8  | 1229.82 | 153.73  | 8.4141  | 0.0034175 |
| Genotype*Time | 1  | 23.93   | 23.93   | 1.3096  | 0.2855575 |
| Residuals     | 8  | 146.16  | 18.27   |         |           |

**B. Systolic Blood Pressure light phase vs. dark phase**

| Factor        | Df | Sum Sq  | Mean Sq | F value | Pr(>F)    |
|---------------|----|---------|---------|---------|-----------|
| Genotype      | 1  | 336     | 336     | 29.8249 | 6.01E-04  |
| Time          | 1  | 1105.71 | 1105.71 | 98.1493 | 9.10E-06  |
| Animal        | 8  | 242.27  | 30.28   | 2.6881  | 0.0917283 |
| Genotype*Time | 1  | 13.68   | 13.68   | 1.2144  | 0.3025017 |
| Residuals     | 8  | 90.12   | 11.27   |         |           |

ANOVA were performed with genotype (Control, cKO), time (light phase vs. dark phase), mouse (for mouse to mouse variability) and interaction between time and genotype as factors.

**Supplemental Table 3:** Quantity of RNA-seq reads generated and aligned against Mus musculus GRCh38 genome

| <b>RNA sample</b>                               | <b>CtrlZT16_1</b> | <b>CtrlZT16_3</b> | <b>CtrlZT16_5</b> | <b>CtrlZT4_1</b> | <b>CtrlZT4_3</b> | <b>CtrlZT4_5</b> |
|-------------------------------------------------|-------------------|-------------------|-------------------|------------------|------------------|------------------|
| NB PF READS [Million]                           | 46.34             | 54.59             | 52.18             | 47.24            | 38.43            | 43.53            |
| READS ALIGNED [Million]                         | 44.21             | 52.77             | 50.38             | 45.39            | 37.02            | 42.15            |
| NB READS UNIQUELY MAPPED INSIDE GENES [Million] | 31.81             | 38.04             | 35.36             | 33.4             | 27.14            | 31.3             |
|                                                 | <b>cKOZT16_2</b>  | <b>cKOZT16_4</b>  | <b>cKOZT16_6</b>  | <b>cKOZT4_2</b>  | <b>cKOZT4_4</b>  | <b>cKOZT4_6</b>  |
| NB PF READS [Million]                           | 53.48             | 47.84             | 35.97             | 45.6             | 51.8             | 35.39            |
| READS ALIGNED [Million]                         | 51.36             | 46.03             | 34.52             | 44.04            | 49.63            | 33.92            |
| NB READS UNIQUELY MAPPED INSIDE GENES [Million] | 35.64             | 34.34             | 25.9              | 33.36            | 37.65            | 25.63            |

**Supplemental Table 4.** Genes differentially expressed in kidneys of cKO mice.

| GeneID             | Symbol        | logFC ZT4 | logFC ZT16 | AveExp   | AveExp  | AveExp    | AveExp   | F      | P.Value  | adj.P.Val | Post-hoc       |
|--------------------|---------------|-----------|------------|----------|---------|-----------|----------|--------|----------|-----------|----------------|
|                    |               |           |            | Ctrl ZT4 | cKO ZT4 | Ctrl ZT16 | cKO ZT16 |        |          |           | classification |
| ENSMUSG00000074254 | Cyp2a4        | -2.30     | -2.31      | 15.37    | 13.07   | 15.98     | 13.67    | 308.89 | 3.15E-10 | 1.91E-06  | ZT16, ZT4      |
| ENSMUSG00000033860 | Fgg           | 3.07      | 3.25       | 9.99     | 13.06   | 10.15     | 13.39    | 277.92 | 5.51E-10 | 1.91E-06  | ZT16, ZT4      |
| ENSMUSG00000026077 | Npas2         | 2.22      | 3.49       | 9.41     | 11.63   | 7.70      | 11.19    | 271.08 | 6.28E-10 | 1.91E-06  | ZT16, ZT4      |
| ENSMUSG00000023913 | Pla2g7        | 1.36      | 1.60       | 10.72    | 12.08   | 10.70     | 12.31    | 270.40 | 6.37E-10 | 1.91E-06  | ZT16, ZT4      |
| ENSMUSG00000026205 | Slc23a3       | 1.48      | 1.53       | 9.42     | 10.90   | 9.55      | 11.08    | 264.36 | 7.17E-10 | 1.91E-06  | ZT16, ZT4      |
| ENSMUSG00000025185 | Loxl4         | 3.00      | 3.36       | 8.22     | 11.22   | 7.67      | 11.03    | 246.21 | 1.04E-09 | 1.99E-06  | ZT16, ZT4      |
| ENSMUSG00000028150 | Rorc          | 2.19      | 0.59       | 11.60    | 13.80   | 13.14     | 13.73    | 244.47 | 1.08E-09 | 1.99E-06  | ZT16, ZT4      |
| ENSMUSG00000035910 | Dcdc2a        | 1.36      | 1.77       | 10.15    | 11.51   | 9.35      | 11.12    | 239.79 | 1.20E-09 | 1.99E-06  | ZT16, ZT4      |
| ENSMUSG00000031373 | Car5b         | 0.99      | 1.44       | 12.66    | 13.66   | 12.30     | 13.75    | 231.12 | 1.46E-09 | 2.15E-06  | ZT16, ZT4      |
| ENSMUSG00000043719 | Col6a6        | 2.65      | 3.40       | 7.42     | 10.07   | 6.32      | 9.71     | 216.66 | 2.04E-09 | 2.71E-06  | ZT16, ZT4      |
| ENSMUSG00000020038 | Cry1          | 2.81      | 0.76       | 8.00     | 10.82   | 10.19     | 10.95    | 207.77 | 2.54E-09 | 3.07E-06  | ZT16, ZT4      |
| ENSMUSG00000046352 | Gjb2          | -1.51     | -1.06      | 12.83    | 11.32   | 12.27     | 11.20    | 199.86 | 3.12E-09 | 3.45E-06  | ZT16, ZT4      |
| ENSMUSG00000021125 | Arg2          | 2.35      | 2.34       | 8.40     | 10.74   | 9.23      | 11.57    | 192.47 | 3.80E-09 | 3.64E-06  | ZT16, ZT4      |
| ENSMUSG00000058756 | Thra          | 1.15      | 1.45       | 11.20    | 12.35   | 10.62     | 12.07    | 192.14 | 3.83E-09 | 3.64E-06  | ZT16, ZT4      |
| ENSMUSG00000030762 | Aqp8          | 2.86      | 3.74       | 7.45     | 10.30   | 5.92      | 9.66     | 179.51 | 5.47E-09 | 4.84E-06  | ZT16, ZT4      |
| ENSMUSG00000028327 | 1300002K09Rik | 0.32      | 1.58       | 11.15    | 11.47   | 10.06     | 11.64    | 172.92 | 6.65E-09 | 5.52E-06  | ZT16, ZT4      |
| ENSMUSG00000021775 | Nr1d2         | -1.99     | -1.98      | 12.85    | 10.86   | 12.85     | 10.86    | 163.70 | 8.84E-09 | 6.91E-06  | ZT16, ZT4      |
| ENSMUSG00000057074 | Ces1g         | -2.62     | -1.89      | 12.01    | 9.39    | 12.08     | 10.18    | 160.62 | 9.76E-09 | 7.20E-06  | ZT16, ZT4      |
| ENSMUSG00000030244 | Gys2          | -0.92     | -1.24      | 11.05    | 10.13   | 10.96     | 9.72     | 150.98 | 1.35E-08 | 9.41E-06  | ZT16, ZT4      |
| ENSMUSG00000055745 | Ldoc1l        | 1.14      | 1.64       | 9.16     | 10.31   | 8.43      | 10.07    | 144.96 | 1.66E-08 | 1.10E-05  | ZT16, ZT4      |
| ENSMUSG00000032374 | Plod2         | 0.91      | 1.19       | 11.84    | 12.75   | 11.64     | 12.83    | 140.74 | 1.94E-08 | 1.23E-05  | ZT16, ZT4      |
| ENSMUSG00000027510 | Rbm38         | 1.57      | 1.52       | 8.14     | 9.71    | 7.84      | 9.36     | 131.82 | 2.72E-08 | 1.64E-05  | ZT16, ZT4      |
| ENSMUSG00000015890 | Amdhd1        | 1.47      | 1.66       | 7.05     | 8.52    | 6.33      | 7.99     | 127.43 | 3.24E-08 | 1.87E-05  | ZT16, ZT4      |
| ENSMUSG00000059406 | Tmprss9       | 1.88      | 2.02       | 7.72     | 9.60    | 7.09      | 9.11     | 125.78 | 3.47E-08 | 1.92E-05  | ZT16, ZT4      |
| ENSMUSG00000048216 | Gpr85         | 1.92      | 1.93       | 6.45     | 8.37    | 5.91      | 7.84     | 124.55 | 3.65E-08 | 1.94E-05  | ZT16, ZT4      |
| ENSMUSG00000069324 | Gm5096        | 2.65      | 2.92       | 5.67     | 8.32    | 5.30      | 8.23     | 122.57 | 3.96E-08 | 1.98E-05  | ZT16, ZT4      |
| ENSMUSG00000062905 | Vmn1r32       | 5.09      | 5.12       | 2.40     | 7.50    | 2.18      | 7.29     | 121.48 | 4.15E-08 | 1.98E-05  | ZT16, ZT4      |
| ENSMUSG00000017677 | Wsb1          | 0.93      | 0.95       | 12.35    | 13.28   | 12.42     | 13.36    | 121.28 | 4.18E-08 | 1.98E-05  | ZT16, ZT4      |

|                    |          |       |       |       |       |       |       |        |          |          |           |
|--------------------|----------|-------|-------|-------|-------|-------|-------|--------|----------|----------|-----------|
| ENSMUSG00000058624 | Gda      | -1.58 | -1.96 | 9.06  | 7.49  | 9.65  | 7.69  | 118.26 | 4.76E-08 | 2.18E-05 | ZT16, ZT4 |
| ENSMUSG00000056973 | Ces1d    | -2.30 | -2.58 | 14.45 | 12.14 | 15.40 | 12.82 | 113.76 | 5.81E-08 | 2.57E-05 | ZT16, ZT4 |
| ENSMUSG00000051435 | Fhad1    | 4.53  | 3.29  | 3.62  | 8.14  | 4.29  | 7.58  | 112.45 | 6.17E-08 | 2.64E-05 | ZT16, ZT4 |
| ENSMUSG00000032607 | Amt      | 0.61  | 1.03  | 11.66 | 12.27 | 11.23 | 12.26 | 111.36 | 6.48E-08 | 2.69E-05 | ZT16, ZT4 |
| ENSMUSG00000074768 | Bhmt     | 2.29  | 2.78  | 7.65  | 9.94  | 6.94  | 9.72  | 108.41 | 7.44E-08 | 2.99E-05 | ZT16, ZT4 |
| ENSMUSG00000040128 | Pnrc1    | 1.41  | 1.00  | 10.60 | 12.00 | 10.75 | 11.75 | 102.46 | 9.93E-08 | 3.82E-05 | ZT16, ZT4 |
| ENSMUSG00000022877 | Hrg      | -2.38 | -2.18 | 9.05  | 6.67  | 8.86  | 6.68  | 102.18 | 1.01E-07 | 3.82E-05 | ZT16, ZT4 |
| ENSMUSG00000036452 | Arhgap26 | 0.81  | 1.33  | 11.26 | 12.07 | 10.78 | 12.10 | 100.90 | 1.07E-07 | 3.96E-05 | ZT16, ZT4 |
| ENSMUSG00000078532 | Nkain1   | -2.03 | -2.27 | 8.39  | 6.36  | 9.54  | 7.27  | 99.92  | 1.13E-07 | 4.02E-05 | ZT16, ZT4 |
| ENSMUSG00000039710 | Slc7a12  | 2.58  | 2.39  | 9.57  | 12.15 | 10.22 | 12.62 | 99.53  | 1.15E-07 | 4.02E-05 | ZT16, ZT4 |
| ENSMUSG00000018427 | Ypel2    | 1.35  | 1.22  | 10.56 | 11.91 | 10.62 | 11.84 | 98.79  | 1.20E-07 | 4.07E-05 | ZT16, ZT4 |
| ENSMUSG00000091898 | Tnnc1    | -1.02 | -1.90 | 6.61  | 5.59  | 8.60  | 6.70  | 98.08  | 1.24E-07 | 4.12E-05 | ZT16, ZT4 |
| ENSMUSG00000078706 | Gm53     | 1.62  | 1.38  | 9.34  | 10.96 | 9.33  | 10.72 | 96.98  | 1.32E-07 | 4.26E-05 | ZT16, ZT4 |
| ENSMUSG00000089678 | Agxt2    | 0.92  | 0.96  | 13.23 | 14.15 | 13.11 | 14.06 | 94.58  | 1.49E-07 | 4.72E-05 | ZT16, ZT4 |
| ENSMUSG00000029650 | Slc46a3  | -1.01 | -1.16 | 11.40 | 10.38 | 11.63 | 10.47 | 92.15  | 1.70E-07 | 5.27E-05 | ZT16, ZT4 |
| ENSMUSG00000020182 | Ddc      | 0.45  | 1.43  | 13.18 | 13.64 | 12.39 | 13.82 | 91.13  | 1.80E-07 | 5.35E-05 | ZT16, ZT4 |
| ENSMUSG00000023067 | Cdkn1a   | 1.50  | 1.56  | 8.73  | 10.23 | 8.61  | 10.17 | 90.75  | 1.84E-07 | 5.35E-05 | ZT16, ZT4 |
| ENSMUSG00000022512 | Cldn1    | 0.94  | 1.14  | 10.93 | 11.87 | 10.17 | 11.31 | 90.66  | 1.85E-07 | 5.35E-05 | ZT16, ZT4 |
| ENSMUSG00000018900 | Slc22a5  | -0.86 | -1.01 | 13.90 | 13.05 | 14.25 | 13.24 | 89.08  | 2.03E-07 | 5.72E-05 | ZT16, ZT4 |
| ENSMUSG00000051262 | Cml3     | -1.62 | -2.24 | 7.76  | 6.14  | 8.70  | 6.46  | 87.73  | 2.19E-07 | 5.98E-05 | ZT16, ZT4 |
| ENSMUSG00000024575 | Pde6a    | -1.24 | -1.28 | 10.59 | 9.35  | 10.24 | 8.96  | 87.58  | 2.21E-07 | 5.98E-05 | ZT16, ZT4 |
| ENSMUSG00000020889 | Nr1d1    | -1.90 | -0.96 | 12.04 | 10.14 | 9.35  | 8.39  | 86.25  | 2.38E-07 | 6.33E-05 | ZT16, ZT4 |
| ENSMUSG00000028001 | Fga      | 2.10  | 2.33  | 11.20 | 13.30 | 10.93 | 13.26 | 85.23  | 2.53E-07 | 6.52E-05 | ZT16, ZT4 |
| ENSMUSG00000005547 | Cyp2a5   | -2.89 | -3.30 | 12.55 | 9.66  | 14.40 | 11.10 | 84.93  | 2.58E-07 | 6.52E-05 | ZT16, ZT4 |
| ENSMUSG00000032602 | Slc25a20 | -0.74 | -0.90 | 11.88 | 11.14 | 12.25 | 11.36 | 84.61  | 2.63E-07 | 6.52E-05 | ZT16, ZT4 |
| ENSMUSG00000006542 | Prkag3   | -1.56 | -2.36 | 8.07  | 6.51  | 8.97  | 6.61  | 84.40  | 2.66E-07 | 6.52E-05 | ZT16, ZT4 |
| ENSMUSG00000027870 | Hao2     | 1.73  | 2.23  | 14.77 | 16.50 | 14.69 | 16.91 | 83.93  | 2.74E-07 | 6.52E-05 | ZT16, ZT4 |
| ENSMUSG00000027347 | Rasgrp1  | 1.03  | 0.58  | 8.99  | 10.01 | 8.90  | 9.48  | 83.85  | 2.75E-07 | 6.52E-05 | ZT16, ZT4 |
| ENSMUSG00000028989 | Angptl7  | -2.01 | -2.46 | 9.37  | 7.35  | 10.26 | 7.80  | 81.98  | 3.08E-07 | 7.18E-05 | ZT16, ZT4 |
| ENSMUSG00000006575 | Rundc3a  | -1.35 | -1.47 | 7.97  | 6.62  | 8.56  | 7.09  | 80.68  | 3.34E-07 | 7.65E-05 | ZT16, ZT4 |
| ENSMUSG00000028528 | Dnajc6   | -0.75 | -0.61 | 11.82 | 11.07 | 11.88 | 11.27 | 80.01  | 3.48E-07 | 7.82E-05 | ZT16, ZT4 |
| ENSMUSG00000033107 | Rnf125   | 1.91  | 1.66  | 6.12  | 8.03  | 5.90  | 7.56  | 79.79  | 3.53E-07 | 7.82E-05 | ZT16, ZT4 |
| ENSMUSG00000015357 | Clpx     | 0.58  | 0.82  | 13.80 | 14.38 | 13.40 | 14.22 | 79.38  | 3.63E-07 | 7.89E-05 | ZT16, ZT4 |
| ENSMUSG00000032902 | Slc16a1  | 0.95  | 1.15  | 12.31 | 13.25 | 12.15 | 13.30 | 77.35  | 4.13E-07 | 8.85E-05 | ZT16, ZT4 |



|                    |               |       |       |       |       |       |       |       |          |          |           |
|--------------------|---------------|-------|-------|-------|-------|-------|-------|-------|----------|----------|-----------|
| ENSMUSG00000041301 | Cftr          | 0.72  | 1.12  | 9.57  | 10.29 | 9.62  | 10.74 | 76.16 | 4.47E-07 | 9.42E-05 | ZT16, ZT4 |
| ENSMUSG00000031326 | Cdx4          | 2.44  | 3.21  | 4.48  | 6.92  | 3.58  | 6.79  | 75.77 | 4.58E-07 | 9.51E-05 | ZT16, ZT4 |
| ENSMUSG00000031938 | 4931406C07Rik | -0.72 | -0.83 | 15.95 | 15.22 | 15.84 | 15.01 | 74.98 | 4.83E-07 | 9.63E-05 | ZT16, ZT4 |
| ENSMUSG00000028607 | Cpt2          | -0.57 | -0.56 | 13.57 | 13.00 | 13.83 | 13.27 | 74.98 | 4.83E-07 | 9.63E-05 | ZT16, ZT4 |
| ENSMUSG00000044505 | Lingo4        | 3.14  | 0.88  | 4.75  | 7.88  | 6.53  | 7.41  | 74.82 | 4.88E-07 | 9.63E-05 | ZT16, ZT4 |
| ENSMUSG00000028976 | Slc2a5        | -0.83 | -0.89 | 12.71 | 11.88 | 12.65 | 11.77 | 74.67 | 4.93E-07 | 9.63E-05 | ZT16, ZT4 |
| ENSMUSG00000029188 | Slc34a2       | 1.70  | 1.45  | 8.00  | 9.70  | 7.45  | 8.89  | 71.50 | 6.13E-07 | 0.000118 | ZT16, ZT4 |
| ENSMUSG00000046324 | Ermp1         | 0.65  | 0.95  | 12.42 | 13.07 | 11.95 | 12.90 | 71.27 | 6.23E-07 | 0.000118 | ZT16, ZT4 |
| ENSMUSG00000002250 | Ppard         | 1.97  | 2.74  | 10.79 | 12.76 | 9.94  | 12.68 | 70.64 | 6.51E-07 | 0.000122 | ZT16, ZT4 |
| ENSMUSG00000039982 | Dtx4          | 0.85  | 1.32  | 10.75 | 11.60 | 9.90  | 11.22 | 69.85 | 6.89E-07 | 0.000127 | ZT16, ZT4 |
| ENSMUSG00000024292 | Cyp4f14       | -1.22 | -1.42 | 7.62  | 6.40  | 7.53  | 6.12  | 69.35 | 7.14E-07 | 0.00013  | ZT16, ZT4 |
| ENSMUSG00000035504 | Reep6         | -1.07 | -0.99 | 11.19 | 10.12 | 11.39 | 10.40 | 68.72 | 7.47E-07 | 0.000134 | ZT16, ZT4 |
| ENSMUSG00000031770 | Herpud1       | -0.51 | -0.74 | 14.08 | 13.57 | 15.06 | 14.31 | 67.78 | 8.00E-07 | 0.000142 | ZT16, ZT4 |
| ENSMUSG00000039193 | Nlrc4         | -1.08 | -0.99 | 8.67  | 7.59  | 8.84  | 7.85  | 67.38 | 8.25E-07 | 0.000143 | ZT16, ZT4 |
| ENSMUSG00000025221 | Kcnp2         | 1.57  | 1.87  | 6.70  | 8.27  | 6.51  | 8.38  | 67.29 | 8.30E-07 | 0.000143 | ZT16, ZT4 |
| ENSMUSG00000079494 | Cml5          | -2.12 | -2.57 | 10.58 | 8.46  | 12.66 | 10.10 | 65.43 | 9.54E-07 | 0.000162 | ZT16, ZT4 |
| ENSMUSG00000033831 | Fgb           | 1.86  | 2.35  | 7.90  | 9.75  | 8.05  | 10.40 | 64.26 | 1.04E-06 | 0.000175 | ZT16, ZT4 |
| ENSMUSG00000046818 | Ddit4l        | 1.18  | 1.01  | 9.73  | 10.92 | 9.64  | 10.65 | 63.69 | 1.09E-06 | 0.000181 | ZT16, ZT4 |
| ENSMUSG00000056666 | Retsat        | -0.96 | -1.02 | 14.39 | 13.43 | 14.79 | 13.77 | 63.46 | 1.11E-06 | 0.000182 | ZT16, ZT4 |
| ENSMUSG00000042115 | Klhdc8a       | 0.74  | 0.71  | 10.29 | 11.02 | 10.17 | 10.88 | 62.46 | 1.20E-06 | 0.000193 | ZT16, ZT4 |
| ENSMUSG00000021263 | Degs2         | -0.65 | -0.73 | 11.76 | 11.11 | 11.66 | 10.93 | 62.44 | 1.20E-06 | 0.000193 | ZT16, ZT4 |
| ENSMUSG00000028527 | Ak4           | -0.25 | -0.75 | 13.82 | 13.57 | 14.80 | 14.05 | 62.28 | 1.22E-06 | 0.000193 | ZT16, ZT4 |
| ENSMUSG00000078597 | Cyp4a12b      | -2.59 | -2.15 | 10.28 | 7.69  | 10.54 | 8.39  | 61.94 | 1.25E-06 | 0.000196 | ZT16, ZT4 |
| ENSMUSG00000039632 | Ccdc151       | -0.86 | -0.55 | 8.37  | 7.51  | 8.33  | 7.77  | 61.70 | 1.28E-06 | 0.000197 | ZT16, ZT4 |
| ENSMUSG00000031382 | Asb11         | 2.17  | 2.12  | 7.07  | 9.24  | 7.69  | 9.80  | 60.71 | 1.38E-06 | 0.000211 | ZT16, ZT4 |
| ENSMUSG00000028957 | Per3          | -1.16 | -1.03 | 10.44 | 9.28  | 11.19 | 10.16 | 60.14 | 1.45E-06 | 0.000219 | ZT16, ZT4 |
| ENSMUSG00000066071 | Cyp4a12a      | -2.89 | -2.33 | 13.14 | 10.25 | 13.34 | 11.02 | 59.24 | 1.56E-06 | 0.000232 | ZT16, ZT4 |
| ENSMUSG00000042102 | Dmgdh         | 0.74  | 0.72  | 12.76 | 13.50 | 12.72 | 13.44 | 59.12 | 1.58E-06 | 0.000232 | ZT16, ZT4 |
| ENSMUSG00000063796 | Slc22a8       | -0.93 | -0.81 | 15.37 | 14.44 | 15.37 | 14.56 | 59.01 | 1.59E-06 | 0.000232 | ZT16, ZT4 |
| ENSMUSG00000025479 | Cyp2e1        | -0.87 | -0.90 | 16.69 | 15.82 | 17.13 | 16.23 | 58.61 | 1.64E-06 | 0.000237 | ZT16, ZT4 |
| ENSMUSG00000079037 | Prnp          | -0.45 | -0.95 | 13.21 | 12.76 | 13.82 | 12.87 | 58.13 | 1.71E-06 | 0.000243 | ZT16, ZT4 |
| ENSMUSG00000041073 | Nacad         | 1.25  | 1.35  | 6.27  | 7.52  | 5.49  | 6.84  | 58.02 | 1.73E-06 | 0.000243 | ZT16, ZT4 |
| ENSMUSG00000029368 | Alb           | -2.94 | -2.71 | 9.28  | 6.33  | 9.79  | 7.07  | 57.93 | 1.74E-06 | 0.000243 | ZT16, ZT4 |
| ENSMUSG00000025347 | Mettl7b       | -0.74 | -0.72 | 13.77 | 13.03 | 14.17 | 13.45 | 57.67 | 1.78E-06 | 0.000246 | ZT16, ZT4 |

|                    |               |       |       |       |       |       |       |       |          |          |           |
|--------------------|---------------|-------|-------|-------|-------|-------|-------|-------|----------|----------|-----------|
| ENSMUSG00000022900 | Ildr1         | 0.59  | 0.87  | 10.62 | 11.22 | 10.67 | 11.54 | 57.35 | 1.83E-06 | 0.000246 | ZT16, ZT4 |
| ENSMUSG00000037697 | Ddhd1         | 0.74  | 0.86  | 10.12 | 10.86 | 10.07 | 10.93 | 57.31 | 1.84E-06 | 0.000246 | ZT16, ZT4 |
| ENSMUSG00000026003 | Acadl         | -0.65 | -0.67 | 14.24 | 13.60 | 14.30 | 13.63 | 57.31 | 1.84E-06 | 0.000246 | ZT16, ZT4 |
| ENSMUSG00000031845 | Bcmo1         | -1.02 | -1.17 | 8.67  | 7.65  | 8.24  | 7.07  | 56.97 | 1.89E-06 | 0.000251 | ZT16, ZT4 |
| ENSMUSG00000062184 | Hs6st2        | -1.07 | -0.94 | 9.24  | 8.16  | 8.97  | 8.03  | 55.96 | 2.07E-06 | 0.000272 | ZT16, ZT4 |
| ENSMUSG00000020123 | Avpr1a        | 0.73  | 0.98  | 9.81  | 10.54 | 9.22  | 10.20 | 55.83 | 2.09E-06 | 0.000272 | ZT16, ZT4 |
| ENSMUSG00000024736 | Tmem132a      | 0.75  | 1.23  | 9.31  | 10.06 | 9.00  | 10.23 | 55.45 | 2.16E-06 | 0.000279 | ZT16, ZT4 |
| ENSMUSG00000047986 | Palm3         | 0.83  | 1.31  | 10.23 | 11.06 | 9.43  | 10.74 | 55.23 | 2.20E-06 | 0.000281 | ZT16, ZT4 |
| ENSMUSG00000033610 | Pank1         | -0.73 | -0.77 | 14.64 | 13.92 | 14.88 | 14.11 | 54.43 | 2.36E-06 | 0.000299 | ZT16, ZT4 |
| ENSMUSG00000074639 | BC089597      | 1.20  | 1.19  | 11.97 | 13.17 | 12.20 | 13.39 | 53.92 | 2.48E-06 | 0.00031  | ZT16, ZT4 |
| ENSMUSG00000041731 | Pgm5          | 0.92  | 0.85  | 8.10  | 9.02  | 7.92  | 8.77  | 53.61 | 2.55E-06 | 0.000316 | ZT16, ZT4 |
| ENSMUSG00000041078 | Grid1         | 1.80  | 2.50  | 6.24  | 8.04  | 4.75  | 7.25  | 53.53 | 2.57E-06 | 0.000316 | ZT16, ZT4 |
| ENSMUSG00000021118 | Plek2         | -0.65 | -0.94 | 7.88  | 7.24  | 8.40  | 7.46  | 52.64 | 2.78E-06 | 0.000337 | ZT16, ZT4 |
| ENSMUSG00000022766 | Serpind1      | 1.78  | 2.53  | 5.26  | 7.04  | 3.98  | 6.51  | 52.62 | 2.79E-06 | 0.000337 | ZT16, ZT4 |
| ENSMUSG00000048387 | Osr1          | 1.03  | 1.12  | 6.15  | 7.18  | 5.84  | 6.96  | 52.32 | 2.87E-06 | 0.000343 | ZT16, ZT4 |
| ENSMUSG00000071177 | Serpina1d     | -2.13 | -1.82 | 11.97 | 9.84  | 12.12 | 10.30 | 51.87 | 2.99E-06 | 0.000355 | ZT16, ZT4 |
| ENSMUSG00000063446 | E130309F12Rik | 1.50  | 1.75  | 5.36  | 6.85  | 4.37  | 6.12  | 51.73 | 3.03E-06 | 0.000356 | ZT16, ZT4 |
| ENSMUSG00000020674 | Pxdn          | 0.40  | 0.71  | 11.23 | 11.63 | 10.46 | 11.17 | 50.54 | 3.39E-06 | 0.000394 | ZT16, ZT4 |
| ENSMUSG00000059824 | Dbp           | -1.58 | -1.48 | 10.96 | 9.38  | 10.59 | 9.11  | 50.50 | 3.41E-06 | 0.000394 | ZT16, ZT4 |
| ENSMUSG00000037348 | Paqr7         | -0.45 | -0.62 | 12.81 | 12.35 | 13.27 | 12.65 | 50.04 | 3.57E-06 | 0.000408 | ZT16, ZT4 |
| ENSMUSG00000004383 | Large         | 0.59  | 0.53  | 9.01  | 9.60  | 8.58  | 9.11  | 49.75 | 3.66E-06 | 0.000416 | ZT16, ZT4 |
| ENSMUSG00000020875 | Hoxb9         | 0.74  | 0.56  | 10.50 | 11.24 | 10.67 | 11.23 | 48.96 | 3.96E-06 | 0.000443 | ZT16, ZT4 |
| ENSMUSG00000004880 | Lbr           | -0.48 | -0.72 | 11.65 | 11.18 | 11.74 | 11.02 | 48.93 | 3.97E-06 | 0.000443 | ZT16, ZT4 |
| ENSMUSG00000068876 | Cgn           | 0.58  | 0.82  | 10.31 | 10.89 | 9.95  | 10.77 | 48.57 | 4.12E-06 | 0.000455 | ZT16, ZT4 |
| ENSMUSG00000025041 | Nt5c2         | -0.56 | -0.34 | 12.42 | 11.85 | 12.40 | 12.06 | 48.51 | 4.14E-06 | 0.000455 | ZT16, ZT4 |
| ENSMUSG00000053819 | Camk2d        | 0.51  | 0.53  | 10.77 | 11.28 | 10.48 | 11.01 | 48.00 | 4.36E-06 | 0.000472 | ZT16, ZT4 |
| ENSMUSG00000079495 | Gm11128       | -1.27 | -1.68 | 11.48 | 10.21 | 13.22 | 11.54 | 47.97 | 4.37E-06 | 0.000472 | ZT16, ZT4 |
| ENSMUSG00000024644 | Cndp2         | -1.19 | -0.99 | 17.02 | 15.84 | 17.28 | 16.30 | 47.57 | 4.56E-06 | 0.000488 | ZT16, ZT4 |
| ENSMUSG00000053303 | Slc22a26      | -1.83 | -1.42 | 11.00 | 9.16  | 11.33 | 9.91  | 47.32 | 4.67E-06 | 0.000496 | ZT16, ZT4 |
| ENSMUSG00000024165 | Hn1l          | 0.52  | 0.85  | 11.70 | 12.22 | 11.29 | 12.14 | 47.22 | 4.72E-06 | 0.000498 | ZT16, ZT4 |
| ENSMUSG00000029772 | Ahcy12        | 0.23  | 0.68  | 14.78 | 15.01 | 14.39 | 15.07 | 46.66 | 5.00E-06 | 0.000523 | ZT16      |
| ENSMUSG00000027359 | Slc27a2       | -0.41 | -0.59 | 18.04 | 17.63 | 18.28 | 17.69 | 46.46 | 5.11E-06 | 0.000526 | ZT16, ZT4 |
| ENSMUSG00000090622 | A930033H14Rik | -0.82 | -2.06 | 6.18  | 5.36  | 7.81  | 5.75  | 46.44 | 5.11E-06 | 0.000526 | ZT16, ZT4 |
| ENSMUSG00000027227 | Sord          | -0.47 | -0.68 | 16.57 | 16.10 | 16.86 | 16.18 | 46.27 | 5.20E-06 | 0.000532 | ZT16, ZT4 |

|                    |           |       |       |       |       |       |       |       |          |          |           |
|--------------------|-----------|-------|-------|-------|-------|-------|-------|-------|----------|----------|-----------|
| ENSMUSG00000023262 | Acy1      | -0.54 | -0.77 | 12.78 | 12.24 | 13.31 | 12.53 | 45.62 | 5.57E-06 | 0.000562 | ZT16, ZT4 |
| ENSMUSG00000055653 | Gpc3      | 1.02  | 0.91  | 11.03 | 12.05 | 11.24 | 12.15 | 45.60 | 5.58E-06 | 0.000562 | ZT16, ZT4 |
| ENSMUSG00000005413 | Hmox1     | -0.83 | -0.72 | 11.54 | 10.71 | 11.82 | 11.10 | 45.06 | 5.91E-06 | 0.00059  | ZT16, ZT4 |
| ENSMUSG00000058997 | Vwa8      | -0.66 | -0.52 | 14.42 | 13.76 | 14.42 | 13.90 | 44.60 | 6.21E-06 | 0.000615 | ZT16, ZT4 |
| ENSMUSG00000033634 | Cml2      | -1.27 | -1.37 | 12.62 | 11.35 | 13.22 | 11.85 | 43.91 | 6.69E-06 | 0.000658 | ZT16, ZT4 |
| ENSMUSG00000057103 | Cml1      | -0.78 | -1.07 | 14.24 | 13.46 | 14.81 | 13.74 | 43.72 | 6.83E-06 | 0.000667 | ZT16, ZT4 |
| ENSMUSG00000034450 | Gulo      | 2.21  | 1.13  | 5.08  | 7.29  | 6.51  | 7.64  | 43.44 | 7.05E-06 | 0.000683 | ZT16, ZT4 |
| ENSMUSG00000058589 | Anks1b    | -2.27 | -3.40 | 6.89  | 4.61  | 7.25  | 3.85  | 43.35 | 7.12E-06 | 0.000685 | ZT16, ZT4 |
| ENSMUSG00000028713 | Cyp4b1    | -0.70 | -0.64 | 17.87 | 17.17 | 17.70 | 17.06 | 43.11 | 7.31E-06 | 0.000699 | ZT16, ZT4 |
| ENSMUSG00000035699 | Slc51a    | -1.24 | -1.64 | 12.84 | 11.60 | 13.62 | 11.97 | 42.91 | 7.48E-06 | 0.000708 | ZT16, ZT4 |
| ENSMUSG00000030545 | Pex11a    | -0.38 | -0.48 | 11.99 | 11.61 | 12.34 | 11.86 | 42.86 | 7.51E-06 | 0.000708 | ZT16, ZT4 |
| ENSMUSG00000031958 | Ldhd      | -0.92 | -0.60 | 16.58 | 15.65 | 16.58 | 15.98 | 42.58 | 7.75E-06 | 0.000725 | ZT16, ZT4 |
| ENSMUSG00000027187 | Cat       | -0.49 | -0.46 | 16.16 | 15.67 | 16.26 | 15.80 | 42.14 | 8.15E-06 | 0.000757 | ZT16, ZT4 |
| ENSMUSG00000052698 | Tln2      | -0.51 | -0.66 | 13.86 | 13.35 | 13.59 | 12.93 | 41.92 | 8.36E-06 | 0.000767 | ZT16, ZT4 |
| ENSMUSG00000002578 | Ikzf4     | 1.71  | 1.82  | 6.85  | 8.55  | 5.80  | 7.61  | 41.85 | 8.42E-06 | 0.000767 | ZT16, ZT4 |
| ENSMUSG00000032913 | Lrig2     | 0.75  | 0.47  | 10.62 | 11.37 | 10.40 | 10.86 | 41.82 | 8.46E-06 | 0.000767 | ZT16, ZT4 |
| ENSMUSG00000031327 | Chic1     | 0.43  | 0.74  | 10.49 | 10.92 | 10.24 | 10.98 | 41.78 | 8.49E-06 | 0.000767 | ZT16, ZT4 |
| ENSMUSG00000043333 | Rhbdl2    | 0.47  | 1.19  | 6.28  | 6.75  | 5.75  | 6.95  | 41.70 | 8.57E-06 | 0.000769 | ZT16, ZT4 |
| ENSMUSG00000016552 | Foxred2   | 0.81  | 1.08  | 9.40  | 10.21 | 8.90  | 9.98  | 41.04 | 9.24E-06 | 0.000821 | ZT16, ZT4 |
| ENSMUSG00000053647 | Gper1     | 0.93  | 0.92  | 6.60  | 7.53  | 6.83  | 7.75  | 41.01 | 9.28E-06 | 0.000821 | ZT16, ZT4 |
| ENSMUSG00000028003 | Lrat      | 0.54  | 1.52  | 9.11  | 9.65  | 7.22  | 8.74  | 40.33 | 1.00E-05 | 0.000877 | ZT16      |
| ENSMUSG00000020604 | Arsg      | 0.19  | 0.77  | 12.43 | 12.62 | 11.68 | 12.44 | 40.30 | 1.01E-05 | 0.000877 | ZT16      |
| ENSMUSG00000028970 | Abcb1b    | 1.03  | 1.04  | 9.29  | 10.32 | 9.32  | 10.36 | 40.28 | 1.01E-05 | 0.000877 | ZT16, ZT4 |
| ENSMUSG00000028712 | Cyp4a31   | -0.74 | -0.52 | 13.69 | 12.96 | 13.86 | 13.34 | 40.17 | 1.02E-05 | 0.000882 | ZT16, ZT4 |
| ENSMUSG00000020635 | Fkbp1b    | 1.09  | 1.59  | 5.58  | 6.67  | 5.41  | 6.99  | 39.77 | 1.07E-05 | 0.000917 | ZT16, ZT4 |
| ENSMUSG00000040998 | Npnt      | 0.91  | 1.07  | 13.32 | 14.23 | 12.92 | 13.99 | 39.73 | 1.08E-05 | 0.000917 | ZT16, ZT4 |
| ENSMUSG00000026621 | Marc1     | -1.93 | -2.81 | 4.79  | 2.86  | 6.58  | 3.77  | 39.53 | 1.10E-05 | 0.000931 | ZT16, ZT4 |
| ENSMUSG00000005268 | Prlr      | 1.84  | 1.42  | 10.64 | 12.47 | 11.06 | 12.48 | 39.50 | 1.11E-05 | 0.000931 | ZT16, ZT4 |
| ENSMUSG00000039270 | Megf9     | 0.68  | 0.74  | 10.48 | 11.16 | 10.38 | 11.12 | 39.45 | 1.11E-05 | 0.000931 | ZT16, ZT4 |
| ENSMUSG00000072949 | Acot1     | -0.80 | -0.64 | 11.31 | 10.51 | 11.33 | 10.69 | 39.33 | 1.13E-05 | 0.000939 | ZT16, ZT4 |
| ENSMUSG00000002204 | Napsa     | -0.64 | -0.62 | 16.79 | 16.15 | 17.01 | 16.40 | 38.91 | 1.19E-05 | 0.000981 | ZT16, ZT4 |
| ENSMUSG00000026417 | Pigr      | 0.92  | 1.03  | 12.56 | 13.48 | 12.38 | 13.40 | 38.78 | 1.21E-05 | 0.000991 | ZT16, ZT4 |
| ENSMUSG00000066366 | Serpina1a | -1.52 | -1.56 | 10.15 | 8.63  | 10.21 | 8.65  | 38.73 | 1.22E-05 | 0.000991 | ZT16, ZT4 |
| ENSMUSG00000010651 | Acaa1b    | -0.63 | -1.14 | 13.37 | 12.73 | 13.87 | 12.73 | 38.62 | 1.23E-05 | 0.000999 | ZT16, ZT4 |

|                     |               |       |       |       |       |       |       |       |          |          |           |
|---------------------|---------------|-------|-------|-------|-------|-------|-------|-------|----------|----------|-----------|
| ENSMUSG00000029482  | Aacs          | -0.64 | -0.96 | 13.08 | 12.44 | 13.62 | 12.66 | 38.10 | 1.31E-05 | 0.001057 | ZT16, ZT4 |
| ENSMUSG00000017868  | Sgk2          | -0.49 | -0.38 | 13.66 | 13.17 | 13.78 | 13.39 | 38.04 | 1.32E-05 | 0.001059 | ZT16, ZT4 |
| ENSMUSG00000079550  | Mpp4          | 0.01  | -1.43 | 5.73  | 5.74  | 7.38  | 5.95  | 37.79 | 1.37E-05 | 0.001086 | ZT16      |
| ENSMUSG00000089694  | Gm4477        | -1.63 | -2.47 | 7.50  | 5.87  | 8.17  | 5.69  | 37.71 | 1.38E-05 | 0.00109  | ZT16, ZT4 |
| ENSMUSG00000021794  | Glud1         | 0.48  | 0.45  | 14.48 | 14.96 | 14.53 | 14.98 | 37.65 | 1.39E-05 | 0.001091 | ZT16, ZT4 |
| ENSMUSG00000016179  | Camk1g        | 0.67  | 0.85  | 8.06  | 8.73  | 7.59  | 8.44  | 37.61 | 1.40E-05 | 0.001091 | ZT16, ZT4 |
| ENSMUSG00000021814  | Anxa7         | -0.51 | -0.51 | 13.54 | 13.02 | 13.69 | 13.18 | 37.44 | 1.43E-05 | 0.001108 | ZT16, ZT4 |
| ENSMUSG00000048960  | Prex2         | -0.44 | -0.67 | 10.78 | 10.34 | 11.33 | 10.66 | 37.12 | 1.49E-05 | 0.001147 | ZT16, ZT4 |
| ENSMUSG00000045094  | Arhgef37      | 1.16  | 1.18  | 6.99  | 8.15  | 6.68  | 7.86  | 37.01 | 1.51E-05 | 0.001156 | ZT16, ZT4 |
| ENSMUSG00000026170  | Cyp27a1       | -0.47 | -0.52 | 11.96 | 11.49 | 12.33 | 11.80 | 36.70 | 1.57E-05 | 0.001195 | ZT16, ZT4 |
| ENSMUSG00000074794  | Arrdc3        | 1.06  | 0.89  | 13.09 | 14.16 | 13.00 | 13.89 | 36.44 | 1.62E-05 | 0.001229 | ZT16, ZT4 |
| ENSMUSG00000013415  | Igf2bp1       | -1.34 | -0.71 | 8.74  | 7.40  | 8.07  | 7.36  | 36.32 | 1.64E-05 | 0.001235 | ZT16, ZT4 |
| ENSMUSG000000051483 | Cbr1          | 0.72  | 0.80  | 11.25 | 11.97 | 11.43 | 12.23 | 36.32 | 1.65E-05 | 0.001235 | ZT16, ZT4 |
| ENSMUSG00000031980  | Agt           | 0.51  | 0.80  | 12.33 | 12.84 | 12.35 | 13.15 | 36.27 | 1.66E-05 | 0.001235 | ZT16, ZT4 |
| ENSMUSG00000060177  | Klk1b22       | -2.24 | -1.68 | 5.98  | 3.75  | 6.33  | 4.65  | 36.12 | 1.69E-05 | 0.001252 | ZT16, ZT4 |
| ENSMUSG00000025934  | Gsta3         | -1.31 | -1.49 | 13.14 | 11.83 | 13.92 | 12.42 | 36.05 | 1.70E-05 | 0.001252 | ZT16, ZT4 |
| ENSMUSG00000030771  | Micalcl       | 0.77  | 1.54  | 7.24  | 8.01  | 6.49  | 8.04  | 36.04 | 1.71E-05 | 0.001252 | ZT16, ZT4 |
| ENSMUSG00000038526  | Car14         | -0.44 | -0.67 | 12.77 | 12.33 | 12.90 | 12.23 | 35.95 | 1.73E-05 | 0.00126  | ZT16, ZT4 |
| ENSMUSG00000038567  | Cyp24a1       | -0.80 | -1.69 | 13.57 | 12.77 | 12.37 | 10.68 | 35.82 | 1.75E-05 | 0.001273 | ZT16, ZT4 |
| ENSMUSG00000025178  | Pi4k2a        | 0.34  | 0.56  | 12.14 | 12.48 | 11.95 | 12.50 | 35.56 | 1.82E-05 | 0.00131  | ZT16, ZT4 |
| ENSMUSG00000037465  | Klf10         | -0.54 | -1.01 | 10.22 | 9.68  | 10.82 | 9.81  | 35.52 | 1.83E-05 | 0.00131  | ZT16, ZT4 |
| ENSMUSG00000016528  | Mapkapk2      | 0.50  | 0.54  | 12.28 | 12.77 | 12.14 | 12.68 | 35.22 | 1.90E-05 | 0.001349 | ZT16, ZT4 |
| ENSMUSG00000061808  | Ttr           | 0.97  | 0.97  | 12.47 | 13.44 | 12.19 | 13.16 | 35.22 | 1.90E-05 | 0.001349 | ZT16, ZT4 |
| ENSMUSG00000019944  | Rhobtb1       | 1.31  | 0.66  | 11.18 | 12.50 | 11.32 | 11.98 | 35.07 | 1.94E-05 | 0.001369 | ZT16, ZT4 |
| ENSMUSG00000027239  | Mdk           | -0.74 | -0.54 | 11.09 | 10.35 | 11.01 | 10.48 | 35.01 | 1.95E-05 | 0.001373 | ZT16, ZT4 |
| ENSMUSG00000025871  | 4833439L19Rik | -0.34 | -0.47 | 15.87 | 15.53 | 16.13 | 15.66 | 34.79 | 2.01E-05 | 0.001406 | ZT16, ZT4 |
| ENSMUSG00000044092  | C130050O18Rik | 0.45  | 0.98  | 6.67  | 7.12  | 6.34  | 7.33  | 34.75 | 2.02E-05 | 0.001406 | ZT16, ZT4 |
| ENSMUSG00000068742  | Cry2          | 1.04  | 0.35  | 10.19 | 11.23 | 10.61 | 10.96 | 34.53 | 2.08E-05 | 0.001441 | ZT4       |
| ENSMUSG00000017146  | Brca1         | 0.27  | 0.92  | 6.82  | 7.09  | 5.97  | 6.89  | 34.21 | 2.17E-05 | 0.001496 | ZT16      |
| ENSMUSG00000024900  | Cpt1a         | -0.44 | -0.50 | 15.23 | 14.79 | 15.03 | 14.53 | 34.06 | 2.22E-05 | 0.001519 | ZT16, ZT4 |
| ENSMUSG00000070348  | Ccnd1         | -0.83 | -0.54 | 13.54 | 12.71 | 13.19 | 12.65 | 33.91 | 2.27E-05 | 0.001543 | ZT16, ZT4 |
| ENSMUSG00000031750  | Ii34          | -0.93 | -0.54 | 10.81 | 9.88  | 10.61 | 10.06 | 33.47 | 2.41E-05 | 0.001628 | ZT16, ZT4 |
| ENSMUSG00000026669  | Mcm10         | -1.01 | -1.21 | 8.46  | 7.46  | 8.95  | 7.74  | 33.45 | 2.41E-05 | 0.001628 | ZT16, ZT4 |
| ENSMUSG00000042251  | Pm20d1        | -0.59 | -0.52 | 13.06 | 12.46 | 13.04 | 12.52 | 33.37 | 2.44E-05 | 0.001639 | ZT16, ZT4 |

|                    |           |       |       |       |       |       |       |       |          |          |           |
|--------------------|-----------|-------|-------|-------|-------|-------|-------|-------|----------|----------|-----------|
| ENSMUSG00000040600 | Eps8l3    | -1.59 | -1.19 | 7.58  | 5.99  | 6.66  | 5.47  | 33.28 | 2.47E-05 | 0.001651 | ZT16, ZT4 |
| ENSMUSG00000021879 | Dnah12    | 0.75  | 0.89  | 6.50  | 7.25  | 5.68  | 6.57  | 33.16 | 2.51E-05 | 0.001669 | ZT16, ZT4 |
| ENSMUSG00000074919 | Gm10787   | -2.26 | -2.63 | 6.41  | 4.15  | 8.96  | 6.33  | 33.07 | 2.55E-05 | 0.001683 | ZT16, ZT4 |
| ENSMUSG00000037411 | Serpine1  | -1.26 | -1.69 | 7.71  | 6.45  | 9.22  | 7.53  | 32.71 | 2.68E-05 | 0.00176  | ZT16, ZT4 |
| ENSMUSG00000049690 | Nckap5    | 0.89  | 1.52  | 8.96  | 9.85  | 7.90  | 9.41  | 32.64 | 2.71E-05 | 0.00177  | ZT16, ZT4 |
| ENSMUSG00000020303 | Stc2      | 1.18  | 0.99  | 7.38  | 8.56  | 6.99  | 7.98  | 32.58 | 2.73E-05 | 0.001775 | ZT16, ZT4 |
| ENSMUSG00000071226 | Cecr2     | 0.58  | 0.65  | 9.51  | 10.09 | 8.93  | 9.58  | 32.54 | 2.74E-05 | 0.001777 | ZT16, ZT4 |
| ENSMUSG00000031271 | Serpina7  | 1.65  | 2.22  | 3.90  | 5.55  | 4.34  | 6.57  | 32.13 | 2.91E-05 | 0.001876 | ZT16, ZT4 |
| ENSMUSG00000030800 | Prss8     | -0.59 | -0.48 | 14.66 | 14.08 | 14.82 | 14.34 | 32.09 | 2.93E-05 | 0.001877 | ZT16, ZT4 |
| ENSMUSG00000028494 | Plin2     | -0.65 | -0.58 | 12.74 | 12.08 | 13.12 | 12.54 | 31.99 | 2.97E-05 | 0.001894 | ZT16, ZT4 |
| ENSMUSG00000026473 | Glul      | -0.24 | -0.72 | 15.07 | 14.83 | 15.83 | 15.12 | 31.83 | 3.04E-05 | 0.001926 | ZT16      |
| ENSMUSG00000031488 | Rab11fip1 | 0.51  | 0.37  | 10.12 | 10.63 | 9.78  | 10.15 | 31.81 | 3.05E-05 | 0.001926 | ZT16, ZT4 |
| ENSMUSG00000043008 | Klhl6     | -0.45 | -0.90 | 8.96  | 8.51  | 9.67  | 8.77  | 31.78 | 3.06E-05 | 0.001926 | ZT16, ZT4 |
| ENSMUSG00000037370 | Enpp1     | -0.40 | -0.50 | 11.56 | 11.17 | 11.48 | 10.98 | 31.53 | 3.17E-05 | 0.001985 | ZT16, ZT4 |
| ENSMUSG00000021702 | Thbs4     | -1.35 | -3.06 | 4.06  | 2.71  | 6.45  | 3.39  | 31.47 | 3.20E-05 | 0.001995 | ZT16, ZT4 |
| ENSMUSG00000049858 | Suox      | 0.41  | 0.46  | 12.15 | 12.57 | 12.07 | 12.54 | 31.27 | 3.29E-05 | 0.002043 | ZT16, ZT4 |
| ENSMUSG00000010760 | Phlda2    | -0.63 | -0.53 | 9.65  | 9.02  | 9.92  | 9.40  | 31.23 | 3.32E-05 | 0.002045 | ZT16, ZT4 |
| ENSMUSG00000034875 | Nudt19    | -0.44 | -0.97 | 15.11 | 14.67 | 16.29 | 15.32 | 31.20 | 3.33E-05 | 0.002045 | ZT16, ZT4 |
| ENSMUSG00000025196 | Cpn1      | 0.81  | 0.87  | 11.41 | 12.22 | 11.12 | 12.00 | 31.07 | 3.39E-05 | 0.002076 | ZT16, ZT4 |
| ENSMUSG00000004035 | Gstm7     | 0.90  | 0.79  | 8.98  | 9.88  | 9.20  | 9.98  | 30.99 | 3.43E-05 | 0.002092 | ZT16, ZT4 |
| ENSMUSG00000026489 | Adck3     | 0.60  | 0.64  | 13.42 | 14.01 | 12.91 | 13.55 | 30.93 | 3.47E-05 | 0.002101 | ZT16, ZT4 |
| ENSMUSG00000018581 | Dnah11    | 0.69  | 0.69  | 7.32  | 8.02  | 6.76  | 7.44  | 30.52 | 3.68E-05 | 0.002219 | ZT16, ZT4 |
| ENSMUSG00000033453 | Adamts15  | 0.85  | 0.81  | 10.34 | 11.18 | 10.08 | 10.89 | 30.50 | 3.69E-05 | 0.002219 | ZT16, ZT4 |
| ENSMUSG00000027249 | F2        | -1.82 | -2.09 | 6.25  | 4.43  | 6.16  | 4.08  | 30.39 | 3.76E-05 | 0.002247 | ZT16, ZT4 |
| ENSMUSG00000066319 | Rtp3      | -0.72 | -0.42 | 7.58  | 6.86  | 7.50  | 7.09  | 30.29 | 3.81E-05 | 0.002271 | ZT16, ZT4 |
| ENSMUSG00000040584 | Abcb1a    | -0.77 | -0.88 | 8.95  | 8.17  | 9.01  | 8.13  | 30.23 | 3.85E-05 | 0.002281 | ZT16, ZT4 |
| ENSMUSG00000066072 | Cyp4a10   | -1.09 | -0.80 | 13.97 | 12.87 | 14.26 | 13.46 | 29.92 | 4.03E-05 | 0.002378 | ZT16, ZT4 |
| ENSMUSG00000079471 | Gm7325    | 1.19  | 0.52  | 6.74  | 7.93  | 7.64  | 8.17  | 29.74 | 4.15E-05 | 0.002429 | ZT4       |
| ENSMUSG00000038968 | Klk1b16   | -2.15 | -2.23 | 6.32  | 4.17  | 6.80  | 4.57  | 29.71 | 4.16E-05 | 0.002429 | ZT16, ZT4 |
| ENSMUSG00000020019 | Ntn4      | 0.56  | 0.50  | 11.43 | 11.99 | 11.29 | 11.79 | 29.70 | 4.17E-05 | 0.002429 | ZT16, ZT4 |
| ENSMUSG00000049580 | Tsku      | -0.89 | -1.19 | 10.36 | 9.46  | 10.85 | 9.65  | 29.56 | 4.26E-05 | 0.002469 | ZT16, ZT4 |
| ENSMUSG00000002233 | Rhoc      | -0.59 | -0.24 | 12.38 | 11.80 | 12.37 | 12.14 | 29.46 | 4.32E-05 | 0.002497 | ZT4       |
| ENSMUSG00000075569 | Rsph10b   | 0.90  | 1.59  | 5.52  | 6.42  | 4.87  | 6.46  | 29.37 | 4.39E-05 | 0.00252  | ZT16, ZT4 |
| ENSMUSG00000004207 | Psap      | -0.47 | -0.28 | 17.42 | 16.96 | 17.34 | 17.06 | 29.35 | 4.40E-05 | 0.00252  | ZT16, ZT4 |



|                     |               |       |       |       |       |       |       |       |          |          |           |
|---------------------|---------------|-------|-------|-------|-------|-------|-------|-------|----------|----------|-----------|
| ENSMUSG00000019906  | Lin7a         | -0.51 | -0.53 | 8.30  | 7.79  | 8.84  | 8.30  | 29.28 | 4.45E-05 | 0.002534 | ZT16, ZT4 |
| ENSMUSG00000027111  | Itga6         | 0.68  | 0.64  | 12.69 | 13.36 | 12.75 | 13.39 | 29.22 | 4.49E-05 | 0.002548 | ZT16, ZT4 |
| ENSMUSG00000020672  | Sntg2         | 0.62  | 2.39  | 6.46  | 7.08  | 4.89  | 7.28  | 29.15 | 4.54E-05 | 0.00256  | ZT16      |
| ENSMUSG00000002346  | Slc25a42      | -0.61 | -0.73 | 12.46 | 11.85 | 12.72 | 11.98 | 29.14 | 4.55E-05 | 0.00256  | ZT16, ZT4 |
| ENSMUSG00000095959  | Gm10845       | -0.14 | 0.88  | 7.77  | 7.63  | 6.73  | 7.61  | 29.11 | 4.57E-05 | 0.00256  | ZT16      |
| ENSMUSG00000032076  | Cadm1         | -0.41 | -0.47 | 11.35 | 10.95 | 11.24 | 10.78 | 29.04 | 4.61E-05 | 0.002575 | ZT16, ZT4 |
| ENSMUSG00000022562  | Oplah         | -0.47 | -0.66 | 13.06 | 12.58 | 13.34 | 12.68 | 28.94 | 4.69E-05 | 0.002605 | ZT16, ZT4 |
| ENSMUSG00000027774  | Gfm1          | -0.38 | -0.39 | 13.53 | 13.14 | 13.70 | 13.31 | 28.84 | 4.76E-05 | 0.002636 | ZT16, ZT4 |
| ENSMUSG00000038677  | Scube3        | 1.33  | 1.91  | 8.07  | 9.41  | 6.73  | 8.64  | 28.74 | 4.84E-05 | 0.002665 | ZT16, ZT4 |
| ENSMUSG00000034171  | Faah          | 0.28  | 0.63  | 12.11 | 12.39 | 11.69 | 12.32 | 28.71 | 4.86E-05 | 0.002669 | ZT16      |
| ENSMUSG00000001155  | Ftcd          | -0.66 | -0.75 | 10.47 | 9.81  | 10.79 | 10.04 | 28.55 | 4.99E-05 | 0.002724 | ZT16, ZT4 |
| ENSMUSG00000034435  | Tmem30b       | 0.68  | 0.20  | 10.27 | 10.96 | 10.32 | 10.52 | 28.27 | 5.21E-05 | 0.002833 | ZT4       |
| ENSMUSG00000020865  | Abcc3         | 1.06  | 1.61  | 7.42  | 8.48  | 6.80  | 8.41  | 28.26 | 5.23E-05 | 0.002833 | ZT16, ZT4 |
| ENSMUSG00000037656  | Slc20a2       | 0.30  | 0.46  | 12.10 | 12.41 | 11.70 | 12.16 | 27.86 | 5.57E-05 | 0.003005 | ZT16, ZT4 |
| ENSMUSG00000025981  | Coq10b        | -0.75 | -0.99 | 11.46 | 10.70 | 12.71 | 11.72 | 27.84 | 5.59E-05 | 0.003005 | ZT16, ZT4 |
| ENSMUSG00000028645  | Slc2a1        | 0.56  | 0.44  | 11.34 | 11.90 | 11.23 | 11.67 | 27.64 | 5.77E-05 | 0.003091 | ZT16, ZT4 |
| ENSMUSG00000062151  | Unc13c        | 1.02  | 1.65  | 6.96  | 7.97  | 6.06  | 7.71  | 27.54 | 5.87E-05 | 0.003119 | ZT16, ZT4 |
| ENSMUSG00000026616  | Cr2           | 0.62  | 0.90  | 6.98  | 7.61  | 6.92  | 7.83  | 27.54 | 5.87E-05 | 0.003119 | ZT16, ZT4 |
| ENSMUSG00000001986  | Gria3         | 0.84  | 0.89  | 9.66  | 10.50 | 9.35  | 10.23 | 27.42 | 5.98E-05 | 0.003166 | ZT16, ZT4 |
| ENSMUSG00000006345  | Ggt1          | -0.43 | -0.34 | 16.37 | 15.95 | 16.49 | 16.15 | 27.21 | 6.20E-05 | 0.003266 | ZT16, ZT4 |
| ENSMUSG00000029125  | Stx18         | 0.28  | 0.66  | 10.71 | 10.98 | 10.80 | 11.45 | 27.08 | 6.32E-05 | 0.00332  | ZT16      |
| ENSMUSG00000022389  | Tef           | -0.38 | -0.60 | 13.90 | 13.51 | 14.01 | 13.42 | 27.05 | 6.36E-05 | 0.003324 | ZT16, ZT4 |
| ENSMUSG00000032786  | Alas1         | -0.58 | -0.69 | 13.60 | 13.02 | 15.09 | 14.41 | 27.00 | 6.41E-05 | 0.003329 | ZT16, ZT4 |
| ENSMUSG00000023873  | 1700010I14Rik | 0.57  | 0.99  | 6.86  | 7.42  | 6.21  | 7.21  | 26.97 | 6.44E-05 | 0.003329 | ZT16, ZT4 |
| ENSMUSG000000051985 | Igfn1         | 1.89  | 1.97  | 5.15  | 7.03  | 4.51  | 6.48  | 26.96 | 6.46E-05 | 0.003329 | ZT16, ZT4 |
| ENSMUSG00000042041  | 2010003K11Rik | -1.79 | -1.53 | 7.75  | 5.97  | 8.22  | 6.69  | 26.94 | 6.48E-05 | 0.003329 | ZT16, ZT4 |
| ENSMUSG00000042195  | Slc35f2       | 0.35  | 0.43  | 9.95  | 10.30 | 9.66  | 10.09 | 26.93 | 6.49E-05 | 0.003329 | ZT16, ZT4 |
| ENSMUSG00000074676  | Foxs1         | -0.09 | -0.98 | 7.37  | 7.28  | 7.21  | 6.23  | 26.87 | 6.55E-05 | 0.003334 | ZT16      |
| ENSMUSG00000040405  | Havcr1        | -1.69 | -1.26 | 7.76  | 6.07  | 7.20  | 5.94  | 26.87 | 6.55E-05 | 0.003334 | ZT16, ZT4 |
| ENSMUSG00000038217  | Tlcd2         | -0.97 | -0.72 | 9.60  | 8.64  | 9.84  | 9.12  | 26.82 | 6.61E-05 | 0.003345 | ZT16, ZT4 |
| ENSMUSG00000032883  | Acsl3         | -0.39 | -0.70 | 10.98 | 10.59 | 11.39 | 10.69 | 26.81 | 6.63E-05 | 0.003345 | ZT16, ZT4 |
| ENSMUSG00000006205  | Htra1         | 0.39  | 0.58  | 12.94 | 13.33 | 12.64 | 13.23 | 26.77 | 6.67E-05 | 0.003354 | ZT16, ZT4 |
| ENSMUSG00000038732  | Mboat1        | 0.94  | 1.01  | 8.17  | 9.11  | 7.26  | 8.26  | 26.44 | 7.05E-05 | 0.003533 | ZT16, ZT4 |
| ENSMUSG00000055022  | Cntn1         | -0.39 | -0.54 | 7.30  | 6.92  | 7.34  | 6.80  | 26.30 | 7.22E-05 | 0.003605 | ZT16, ZT4 |

|                    |               |       |       |       |       |       |       |       |          |          |           |
|--------------------|---------------|-------|-------|-------|-------|-------|-------|-------|----------|----------|-----------|
| ENSMUSG00000044949 | Ubt2          | 1.13  | 0.72  | 5.56  | 6.69  | 5.57  | 6.29  | 26.23 | 7.30E-05 | 0.003632 | ZT16, ZT4 |
| ENSMUSG00000039620 | 6430573F11Rik | 0.80  | 1.04  | 7.77  | 8.57  | 6.93  | 7.97  | 26.19 | 7.35E-05 | 0.003641 | ZT16, ZT4 |
| ENSMUSG00000048763 | Hoxb3         | 0.71  | 0.82  | 7.83  | 8.54  | 7.64  | 8.46  | 26.00 | 7.60E-05 | 0.003751 | ZT16, ZT4 |
| ENSMUSG00000035031 | C8a           | -0.93 | -0.58 | 11.21 | 10.28 | 11.24 | 10.66 | 25.96 | 7.64E-05 | 0.003751 | ZT16, ZT4 |
| ENSMUSG00000010025 | Aldh3a2       | -0.53 | -0.40 | 14.73 | 14.20 | 14.92 | 14.52 | 25.95 | 7.65E-05 | 0.003751 | ZT16, ZT4 |
| ENSMUSG00000002289 | Angptl4       | -1.49 | -2.19 | 10.92 | 9.43  | 11.24 | 9.05  | 25.90 | 7.73E-05 | 0.003773 | ZT16, ZT4 |
| ENSMUSG00000006724 | Cyp27b1       | -1.59 | -1.07 | 8.60  | 7.00  | 10.38 | 9.31  | 25.86 | 7.78E-05 | 0.003777 | ZT16, ZT4 |
| ENSMUSG00000021281 | Tnfaip2       | 0.48  | 0.47  | 11.34 | 11.82 | 11.10 | 11.57 | 25.85 | 7.79E-05 | 0.003777 | ZT16, ZT4 |
| ENSMUSG00000026853 | Crat          | -0.47 | -0.42 | 13.48 | 13.00 | 13.71 | 13.29 | 25.79 | 7.88E-05 | 0.003796 | ZT16, ZT4 |
| ENSMUSG00000056708 | Ier5          | 0.98  | 0.22  | 9.14  | 10.12 | 9.44  | 9.66  | 25.78 | 7.89E-05 | 0.003796 | ZT4       |
| ENSMUSG00000030170 | Wnt5b         | -0.30 | -0.92 | 7.95  | 7.65  | 8.42  | 7.50  | 25.74 | 7.95E-05 | 0.003809 | ZT16      |
| ENSMUSG00000005125 | Ndr1          | 0.45  | 0.59  | 17.82 | 18.27 | 17.34 | 17.93 | 25.61 | 8.11E-05 | 0.003876 | ZT16, ZT4 |
| ENSMUSG00000021384 | Susd3         | -0.57 | -0.80 | 11.42 | 10.84 | 12.43 | 11.63 | 25.50 | 8.27E-05 | 0.003924 | ZT16, ZT4 |
| ENSMUSG00000043668 | Tox3          | 0.50  | 0.76  | 8.37  | 8.87  | 7.98  | 8.74  | 25.50 | 8.28E-05 | 0.003924 | ZT16, ZT4 |
| ENSMUSG00000021509 | Slc25a48      | -0.49 | -0.48 | 11.35 | 10.87 | 11.02 | 10.53 | 25.45 | 8.35E-05 | 0.003937 | ZT16, ZT4 |
| ENSMUSG00000073988 | Ttpa          | -1.09 | -1.15 | 10.28 | 9.19  | 11.03 | 9.89  | 25.44 | 8.37E-05 | 0.003937 | ZT16, ZT4 |
| ENSMUSG00000058258 | Idi1          | 0.48  | 0.95  | 9.64  | 10.12 | 9.36  | 10.31 | 25.42 | 8.39E-05 | 0.003937 | ZT16, ZT4 |
| ENSMUSG00000017978 | Cadps2        | 0.39  | 0.41  | 9.80  | 10.19 | 9.78  | 10.19 | 25.22 | 8.69E-05 | 0.004065 | ZT16, ZT4 |
| ENSMUSG00000023073 | Slc10a2       | 0.69  | 0.92  | 10.97 | 11.66 | 11.22 | 12.14 | 25.16 | 8.79E-05 | 0.00408  | ZT16, ZT4 |
| ENSMUSG00000022853 | Ehhadh        | -0.78 | -0.49 | 16.17 | 15.39 | 16.61 | 16.12 | 25.16 | 8.79E-05 | 0.00408  | ZT16, ZT4 |
| ENSMUSG00000036655 | Colec11       | -0.72 | -0.52 | 7.23  | 6.51  | 7.44  | 6.92  | 25.11 | 8.87E-05 | 0.004103 | ZT16, ZT4 |
| ENSMUSG00000028023 | Pitx2         | 0.55  | 0.71  | 7.82  | 8.37  | 7.66  | 8.37  | 25.07 | 8.93E-05 | 0.004115 | ZT16, ZT4 |
| ENSMUSG00000022408 | Fam83f        | 0.52  | 0.87  | 7.46  | 7.98  | 6.86  | 7.73  | 25.05 | 8.96E-05 | 0.004115 | ZT16, ZT4 |
| ENSMUSG00000010064 | Slc38a3       | 0.57  | 0.80  | 11.52 | 12.09 | 11.65 | 12.45 | 24.97 | 9.08E-05 | 0.004157 | ZT16, ZT4 |
| ENSMUSG00000031016 | Wee1          | -0.37 | -0.99 | 8.71  | 8.34  | 9.66  | 8.67  | 24.92 | 9.17E-05 | 0.004183 | ZT16      |
| ENSMUSG00000039633 | Lonrf1        | -0.23 | -1.40 | 8.74  | 8.51  | 9.75  | 8.35  | 24.76 | 9.43E-05 | 0.004286 | ZT16      |
| ENSMUSG00000045284 | Dcaf12l1      | 0.51  | 0.56  | 8.65  | 9.16  | 8.14  | 8.69  | 24.70 | 9.54E-05 | 0.004322 | ZT16, ZT4 |
| ENSMUSG00000015837 | Sqstm1        | -0.40 | -0.33 | 15.37 | 14.97 | 15.29 | 14.96 | 24.64 | 9.63E-05 | 0.004342 | ZT16, ZT4 |
| ENSMUSG00000015653 | Steap2        | -0.29 | -0.38 | 13.24 | 12.94 | 13.51 | 13.13 | 24.63 | 9.65E-05 | 0.004342 | ZT16, ZT4 |
| ENSMUSG00000005980 | Dnase1        | -1.04 | -1.25 | 15.52 | 14.48 | 15.91 | 14.66 | 24.58 | 9.74E-05 | 0.00437  | ZT16, ZT4 |
| ENSMUSG00000052387 | Trpm3         | 0.86  | 1.15  | 5.53  | 6.40  | 5.34  | 6.49  | 24.55 | 9.79E-05 | 0.004378 | ZT16, ZT4 |
| ENSMUSG00000042363 | Lgalsl        | 0.49  | 0.49  | 10.40 | 10.88 | 10.14 | 10.62 | 24.45 | 9.96E-05 | 0.004433 | ZT16, ZT4 |
| ENSMUSG00000096852 | Cyp2d12       | 1.06  | 1.17  | 12.10 | 13.16 | 12.41 | 13.59 | 24.44 | 9.98E-05 | 0.004433 | ZT16, ZT4 |
| ENSMUSG00000073418 | C4b           | -0.86 | -0.85 | 8.82  | 7.96  | 9.08  | 8.23  | 24.38 | 0.000101 | 0.004456 | ZT16, ZT4 |

|                    |               |       |       |       |       |       |       |       |           |          |           |
|--------------------|---------------|-------|-------|-------|-------|-------|-------|-------|-----------|----------|-----------|
| ENSMUSG00000056124 | B4galt6       | 0.54  | 0.38  | 9.90  | 10.44 | 9.76  | 10.14 | 24.38 | 0.000101  | 0.004456 | ZT16, ZT4 |
| ENSMUSG00000033096 | Apmap         | 0.36  | 0.60  | 13.08 | 13.44 | 13.07 | 13.67 | 24.35 | 0.0001016 | 0.004467 | ZT16, ZT4 |
| ENSMUSG00000099032 | Tcf24         | 0.63  | 0.64  | 8.16  | 8.79  | 7.85  | 8.49  | 24.29 | 0.0001026 | 0.004497 | ZT16, ZT4 |
| ENSMUSG00000025533 | Asl           | -0.37 | -0.48 | 13.86 | 13.48 | 13.94 | 13.46 | 24.26 | 0.0001032 | 0.004508 | ZT16, ZT4 |
| ENSMUSG00000039652 | Cpeb3         | -0.58 | -1.02 | 10.83 | 10.24 | 10.76 | 9.74  | 24.15 | 0.0001053 | 0.004586 | ZT16, ZT4 |
| ENSMUSG00000000594 | Gm2a          | -0.43 | -0.29 | 14.48 | 14.05 | 14.44 | 14.15 | 24.04 | 0.0001075 | 0.004665 | ZT16, ZT4 |
| ENSMUSG00000020859 | Spag9         | -0.26 | -0.41 | 13.65 | 13.39 | 13.73 | 13.31 | 23.94 | 0.0001095 | 0.004723 | ZT16, ZT4 |
| ENSMUSG00000033082 | Clec1a        | -0.53 | -0.28 | 8.56  | 8.03  | 8.53  | 8.25  | 23.93 | 0.0001097 | 0.004723 | ZT16, ZT4 |
| ENSMUSG00000074715 | Ccl28         | 1.51  | 1.91  | 10.04 | 11.55 | 10.54 | 12.44 | 23.91 | 0.0001099 | 0.004723 | ZT16, ZT4 |
| ENSMUSG00000042942 | Greb1l        | 0.82  | 1.02  | 10.47 | 11.29 | 9.29  | 10.31 | 23.84 | 0.0001113 | 0.004769 | ZT16, ZT4 |
| ENSMUSG00000045215 | Asxl3         | 0.72  | 1.00  | 8.72  | 9.43  | 8.19  | 9.20  | 23.64 | 0.0001157 | 0.004933 | ZT16, ZT4 |
| ENSMUSG00000039395 | Mreg          | 0.00  | -0.97 | 7.61  | 7.61  | 8.11  | 7.14  | 23.63 | 0.0001159 | 0.004933 | ZT16      |
| ENSMUSG00000041193 | Pla2g5        | 0.76  | 1.06  | 9.59  | 10.35 | 9.24  | 10.30 | 23.60 | 0.0001165 | 0.004942 | ZT16, ZT4 |
| ENSMUSG00000020051 | Pah           | -0.37 | -0.44 | 16.81 | 16.44 | 16.77 | 16.33 | 23.54 | 0.0001177 | 0.004978 | ZT16, ZT4 |
| ENSMUSG00000006641 | Slc5a6        | -0.64 | -0.49 | 10.38 | 9.74  | 9.87  | 9.39  | 23.39 | 0.0001212 | 0.005109 | ZT16, ZT4 |
| ENSMUSG00000029499 | Pxmp2         | -0.44 | -0.64 | 11.29 | 10.84 | 11.93 | 11.28 | 23.34 | 0.0001223 | 0.005139 | ZT16, ZT4 |
| ENSMUSG00000019767 | Ccdc170       | 0.57  | 1.34  | 7.15  | 7.72  | 6.82  | 8.16  | 23.31 | 0.0001229 | 0.005146 | ZT16      |
| ENSMUSG00000002228 | Ppm1j         | -1.19 | -1.09 | 7.78  | 6.58  | 7.29  | 6.19  | 23.27 | 0.000124  | 0.005176 | ZT16, ZT4 |
| ENSMUSG00000029913 | Prdm5         | 0.59  | 0.45  | 8.50  | 9.10  | 8.39  | 8.84  | 23.21 | 0.0001254 | 0.005218 | ZT16, ZT4 |
| ENSMUSG00000078651 | Aoc2          | 1.12  | 0.24  | 6.51  | 7.63  | 6.54  | 6.79  | 23.16 | 0.0001264 | 0.005245 | ZT4       |
| ENSMUSG00000055737 | Ghr           | -0.34 | -0.41 | 15.71 | 15.36 | 15.87 | 15.46 | 23.14 | 0.000127  | 0.005245 | ZT16, ZT4 |
| ENSMUSG00000055866 | Per2          | 1.20  | -0.27 | 9.41  | 10.61 | 11.94 | 11.67 | 23.13 | 0.0001272 | 0.005245 | ZT4       |
| ENSMUSG00000038079 | Tmem237       | -0.91 | -1.09 | 11.02 | 10.11 | 11.46 | 10.37 | 23.11 | 0.0001278 | 0.005253 | ZT16, ZT4 |
| ENSMUSG00000054057 | A930004D18Rik | 0.95  | 1.07  | 7.50  | 8.45  | 7.14  | 8.22  | 23.00 | 0.0001304 | 0.005345 | ZT16, ZT4 |
| ENSMUSG00000023249 | Parp3         | -0.45 | -0.27 | 11.30 | 10.85 | 11.10 | 10.84 | 22.93 | 0.0001322 | 0.005386 | ZT16, ZT4 |
| ENSMUSG00000079737 | 3110001I22Rik | -0.41 | -0.59 | 7.23  | 6.82  | 7.20  | 6.60  | 22.93 | 0.0001322 | 0.005386 | ZT16, ZT4 |
| ENSMUSG00000026110 | Mgat4a        | 0.41  | 0.34  | 10.64 | 11.04 | 10.66 | 10.99 | 22.90 | 0.000133  | 0.0054   | ZT16, ZT4 |
| ENSMUSG00000020377 | Ltc4s         | 0.78  | 0.79  | 7.89  | 8.68  | 8.37  | 9.16  | 22.87 | 0.0001337 | 0.005412 | ZT16, ZT4 |
| ENSMUSG00000032840 | 2410131K14Rik | 0.53  | 0.11  | 10.43 | 10.96 | 10.76 | 10.87 | 22.82 | 0.000135  | 0.005448 | ZT4       |
| ENSMUSG00000052572 | Dlg2          | -0.54 | -1.22 | 7.64  | 7.10  | 8.26  | 7.04  | 22.71 | 0.0001378 | 0.005544 | ZT16      |
| ENSMUSG00000007989 | Fzd3          | 0.50  | 0.38  | 6.84  | 7.35  | 6.97  | 7.35  | 22.69 | 0.0001383 | 0.005549 | ZT16, ZT4 |
| ENSMUSG00000044033 | Ccdc141       | 0.44  | 0.60  | 11.72 | 12.16 | 11.97 | 12.57 | 22.57 | 0.0001415 | 0.005661 | ZT16, ZT4 |
| ENSMUSG00000043614 | Vps37d        | 0.63  | 0.51  | 8.42  | 9.04  | 7.81  | 8.33  | 22.50 | 0.0001435 | 0.005723 | ZT16, ZT4 |
| ENSMUSG00000022453 | Naga          | 0.32  | 0.45  | 11.89 | 12.21 | 11.69 | 12.14 | 22.46 | 0.0001445 | 0.00573  | ZT16, ZT4 |

|                     |               |       |       |       |       |       |       |       |           |          |           |
|---------------------|---------------|-------|-------|-------|-------|-------|-------|-------|-----------|----------|-----------|
| ENSMUSG00000075585  | 6330403L08Rik | 0.67  | 0.80  | 6.87  | 7.54  | 6.50  | 7.30  | 22.46 | 0.0001446 | 0.00573  | ZT16, ZT4 |
| ENSMUSG00000076431  | Sox4          | 0.47  | 0.46  | 9.60  | 10.07 | 9.22  | 9.69  | 22.41 | 0.000146  | 0.005769 | ZT16, ZT4 |
| ENSMUSG00000001773  | Folh1         | 0.74  | 1.25  | 13.39 | 14.13 | 13.49 | 14.74 | 22.39 | 0.0001466 | 0.005774 | ZT16, ZT4 |
| ENSMUSG000000034917 | Tjp3          | 0.60  | 0.78  | 9.26  | 9.85  | 8.91  | 9.68  | 22.37 | 0.000147  | 0.005774 | ZT16, ZT4 |
| ENSMUSG000000054074 | Skida1        | 0.70  | 0.43  | 8.63  | 9.33  | 8.33  | 8.76  | 22.31 | 0.0001487 | 0.005825 | ZT16, ZT4 |
| ENSMUSG000000028125 | Abca4         | 0.80  | 0.70  | 9.27  | 10.07 | 8.86  | 9.56  | 22.30 | 0.0001492 | 0.005827 | ZT16, ZT4 |
| ENSMUSG000000069372 | Ctxn3         | -3.21 | -2.25 | 7.77  | 4.56  | 6.98  | 4.73  | 22.28 | 0.0001498 | 0.005832 | ZT16, ZT4 |
| ENSMUSG000000024386 | Proc          | -0.34 | -0.27 | 13.55 | 13.22 | 13.54 | 13.27 | 22.21 | 0.0001516 | 0.005886 | ZT16, ZT4 |
| ENSMUSG000000072575 | Eddm3b        | 1.37  | 1.30  | 6.46  | 7.84  | 6.55  | 7.85  | 22.19 | 0.0001522 | 0.005894 | ZT16, ZT4 |
| ENSMUSG000000027257 | Pacsin3       | 0.42  | 0.36  | 10.04 | 10.46 | 9.97  | 10.33 | 22.08 | 0.0001556 | 0.006005 | ZT16, ZT4 |
| ENSMUSG000000032564 | Cpne4         | -0.26 | -0.64 | 10.55 | 10.29 | 10.91 | 10.28 | 21.98 | 0.0001589 | 0.006115 | ZT16      |
| ENSMUSG000000041323 | Ak7           | -0.47 | -0.76 | 8.00  | 7.54  | 8.44  | 7.68  | 21.85 | 0.0001629 | 0.006237 | ZT16, ZT4 |
| ENSMUSG000000044393 | Dsg2          | 0.51  | 0.63  | 9.08  | 9.59  | 8.71  | 9.33  | 21.85 | 0.000163  | 0.006237 | ZT16, ZT4 |
| ENSMUSG000000046056 | Sbsn          | 0.85  | 0.60  | 6.85  | 7.70  | 6.30  | 6.90  | 21.75 | 0.0001662 | 0.006324 | ZT16, ZT4 |
| ENSMUSG000000041594 | Tmtc4         | -0.17 | -0.45 | 10.82 | 10.65 | 11.16 | 10.71 | 21.75 | 0.0001662 | 0.006324 | ZT16      |
| ENSMUSG000000038059 | Smim3         | 0.30  | 0.64  | 9.37  | 9.67  | 9.05  | 9.69  | 21.68 | 0.0001683 | 0.006367 | ZT16      |
| ENSMUSG000000040471 | Ggt6          | 0.41  | 0.64  | 9.69  | 10.10 | 9.06  | 9.70  | 21.68 | 0.0001683 | 0.006367 | ZT16, ZT4 |
| ENSMUSG000000028127 | Abcd3         | -0.28 | -0.38 | 14.91 | 14.63 | 15.20 | 14.82 | 21.66 | 0.0001691 | 0.006369 | ZT16, ZT4 |
| ENSMUSG000000026189 | Pecr          | -0.39 | -0.34 | 14.80 | 14.41 | 14.77 | 14.43 | 21.65 | 0.0001693 | 0.006369 | ZT16, ZT4 |
| ENSMUSG000000056413 | Adap1         | 0.17  | 0.56  | 10.18 | 10.35 | 9.72  | 10.28 | 21.63 | 0.0001701 | 0.00638  | ZT16      |
| ENSMUSG000000028553 | Angptl3       | 0.90  | 0.90  | 9.69  | 10.58 | 10.02 | 10.91 | 21.60 | 0.0001711 | 0.006399 | ZT16, ZT4 |
| ENSMUSG000000045594 | Glb1          | -0.34 | -0.31 | 13.79 | 13.46 | 13.78 | 13.48 | 21.50 | 0.0001747 | 0.006516 | ZT16, ZT4 |
| ENSMUSG000000028699 | Tspan1        | 0.38  | 0.42  | 10.92 | 11.30 | 10.86 | 11.28 | 21.47 | 0.0001755 | 0.00653  | ZT16, ZT4 |
| ENSMUSG000000000690 | Hoxb6         | 0.39  | 0.25  | 9.97  | 10.37 | 10.03 | 10.27 | 21.46 | 0.0001761 | 0.006533 | ZT16, ZT4 |
| ENSMUSG000000022438 | Parvb         | 1.14  | 0.86  | 8.96  | 10.10 | 8.62  | 9.48  | 21.41 | 0.0001779 | 0.006581 | ZT16, ZT4 |
| ENSMUSG000000072647 | Adam1a        | 1.16  | 0.33  | 4.74  | 5.90  | 5.37  | 5.70  | 21.38 | 0.0001788 | 0.006594 | ZT4       |
| ENSMUSG000000028792 | Ak2           | -0.31 | -0.35 | 13.37 | 13.06 | 13.59 | 13.24 | 21.36 | 0.0001797 | 0.006609 | ZT16, ZT4 |
| ENSMUSG000000038172 | Ttc39b        | -0.31 | -0.30 | 10.43 | 10.11 | 10.28 | 9.98  | 21.29 | 0.0001822 | 0.006663 | ZT16, ZT4 |
| ENSMUSG000000056698 | Elmod3        | -0.37 | -0.27 | 11.22 | 10.85 | 11.15 | 10.88 | 21.28 | 0.0001825 | 0.006663 | ZT16, ZT4 |
| ENSMUSG000000037780 | Mbl1          | -1.46 | -1.34 | 8.29  | 6.83  | 8.95  | 7.60  | 21.28 | 0.0001826 | 0.006663 | ZT16, ZT4 |
| ENSMUSG000000004558 | Ndrp2         | -0.49 | -0.48 | 12.99 | 12.49 | 13.18 | 12.70 | 21.23 | 0.0001843 | 0.006704 | ZT16, ZT4 |
| ENSMUSG000000039693 | Msantd3       | 0.58  | 0.56  | 7.76  | 8.34  | 7.82  | 8.38  | 21.15 | 0.0001874 | 0.006799 | ZT16, ZT4 |
| ENSMUSG000000022613 | Miox          | -0.74 | -0.74 | 17.27 | 16.52 | 17.67 | 16.93 | 21.07 | 0.0001905 | 0.006893 | ZT16, ZT4 |
| ENSMUSG000000022875 | Kng1          | 0.72  | 1.46  | 5.64  | 6.35  | 5.39  | 6.85  | 21.01 | 0.0001927 | 0.006928 | ZT16      |

|                    |           |       |       |       |       |       |       |       |           |          |           |
|--------------------|-----------|-------|-------|-------|-------|-------|-------|-------|-----------|----------|-----------|
| ENSMUSG00000049630 | C1ql3     | -0.93 | -1.07 | 6.23  | 5.30  | 7.11  | 6.03  | 21.01 | 0.0001928 | 0.006928 | ZT16, ZT4 |
| ENSMUSG00000022861 | Dgkg      | 0.48  | 1.28  | 9.56  | 10.04 | 7.62  | 8.90  | 21.00 | 0.0001932 | 0.006928 | ZT16      |
| ENSMUSG00000024371 | C2        | -0.46 | -0.58 | 10.19 | 9.72  | 10.55 | 9.97  | 20.98 | 0.000194  | 0.006928 | ZT16, ZT4 |
| ENSMUSG00000036745 | Ttll7     | -0.66 | -0.74 | 8.28  | 7.62  | 8.42  | 7.68  | 20.98 | 0.0001941 | 0.006928 | ZT16, ZT4 |
| ENSMUSG00000075478 | Slitrk1   | 0.95  | 1.26  | 6.00  | 6.96  | 5.16  | 6.42  | 20.90 | 0.0001971 | 0.007017 | ZT16, ZT4 |
| ENSMUSG00000022969 | Il10rb    | -0.52 | -0.48 | 11.21 | 10.69 | 11.34 | 10.86 | 20.77 | 0.0002023 | 0.007179 | ZT16, ZT4 |
| ENSMUSG00000035486 | Plk5      | -0.64 | -1.30 | 6.14  | 5.50  | 7.05  | 5.75  | 20.74 | 0.0002037 | 0.007179 | ZT16      |
| ENSMUSG00000024485 | Slc4a9    | 0.50  | 0.49  | 11.90 | 12.40 | 11.81 | 12.30 | 20.73 | 0.0002043 | 0.007179 | ZT16, ZT4 |
| ENSMUSG00000078451 | Ppil6     | 0.32  | 0.54  | 8.57  | 8.89  | 8.38  | 8.92  | 20.72 | 0.0002047 | 0.007179 | ZT16, ZT4 |
| ENSMUSG00000068747 | Sort1     | 0.60  | 0.45  | 11.39 | 11.99 | 11.09 | 11.53 | 20.71 | 0.0002051 | 0.007179 | ZT16, ZT4 |
| ENSMUSG00000032561 | Acpp      | 0.43  | 0.42  | 9.23  | 9.66  | 9.09  | 9.50  | 20.70 | 0.0002053 | 0.007179 | ZT16, ZT4 |
| ENSMUSG00000030562 | Nox4      | -0.44 | -0.75 | 14.97 | 14.53 | 15.64 | 14.89 | 20.70 | 0.0002055 | 0.007179 | ZT16, ZT4 |
| ENSMUSG00000027641 | Rbl1      | 0.39  | 0.45  | 9.42  | 9.82  | 9.18  | 9.63  | 20.62 | 0.000209  | 0.007257 | ZT16, ZT4 |
| ENSMUSG00000038552 | Fndc4     | 0.51  | 0.24  | 7.35  | 7.85  | 7.20  | 7.44  | 20.61 | 0.0002094 | 0.007257 | ZT4       |
| ENSMUSG00000037129 | Tmprss13  | 1.47  | 1.43  | 4.86  | 6.32  | 4.78  | 6.20  | 20.60 | 0.0002095 | 0.007257 | ZT16, ZT4 |
| ENSMUSG00000030257 | Srgap3    | 0.88  | 0.57  | 9.31  | 10.18 | 9.16  | 9.73  | 20.58 | 0.0002105 | 0.007257 | ZT16, ZT4 |
| ENSMUSG00000052974 | Cyp2f2    | 0.25  | 0.87  | 7.59  | 7.84  | 6.88  | 7.75  | 20.58 | 0.0002105 | 0.007257 | ZT16      |
| ENSMUSG00000056749 | Nfil3     | 1.66  | 0.40  | 8.72  | 10.38 | 10.10 | 10.50 | 20.57 | 0.000211  | 0.007257 | ZT4       |
| ENSMUSG00000038550 | Gm129     | -1.99 | -1.92 | 6.79  | 4.81  | 7.40  | 5.47  | 20.47 | 0.0002153 | 0.007389 | ZT16, ZT4 |
| ENSMUSG00000037001 | Zfp39     | 0.15  | 0.57  | 8.76  | 8.92  | 8.03  | 8.60  | 20.36 | 0.0002203 | 0.00754  | ZT16      |
| ENSMUSG00000062410 | Hsd3b3    | -0.59 | -0.97 | 12.60 | 12.01 | 13.48 | 12.50 | 20.25 | 0.0002253 | 0.007692 | ZT16, ZT4 |
| ENSMUSG00000045515 | Pou3f3    | 0.51  | 0.15  | 10.91 | 11.42 | 10.92 | 11.07 | 20.14 | 0.000231  | 0.007864 | ZT4       |
| ENSMUSG00000021069 | Pygl      | 0.45  | 0.44  | 11.00 | 11.45 | 11.15 | 11.60 | 20.08 | 0.0002337 | 0.007938 | ZT16, ZT4 |
| ENSMUSG00000026399 | Cd55      | -0.82 | -0.76 | 10.22 | 9.41  | 10.36 | 9.60  | 19.95 | 0.0002405 | 0.008147 | ZT16, ZT4 |
| ENSMUSG00000048087 | Gm4737    | -0.42 | -0.42 | 12.24 | 11.82 | 12.55 | 12.13 | 19.89 | 0.0002434 | 0.008225 | ZT16, ZT4 |
| ENSMUSG00000039629 | Strip2    | 0.62  | 0.92  | 8.04  | 8.66  | 7.88  | 8.80  | 19.84 | 0.000246  | 0.008291 | ZT16, ZT4 |
| ENSMUSG00000030814 | Bcl7c     | 0.58  | 0.65  | 9.06  | 9.63  | 8.93  | 9.58  | 19.76 | 0.0002503 | 0.008393 | ZT16, ZT4 |
| ENSMUSG00000032420 | Nt5e      | 0.48  | 0.59  | 13.15 | 13.63 | 13.64 | 14.23 | 19.76 | 0.0002503 | 0.008393 | ZT16, ZT4 |
| ENSMUSG00000040964 | Arhgef10l | 0.46  | 0.94  | 11.84 | 12.30 | 11.22 | 12.16 | 19.68 | 0.0002546 | 0.008516 | ZT16      |
| ENSMUSG00000026687 | Aldh9a1   | -0.37 | -0.45 | 14.41 | 14.03 | 14.48 | 14.03 | 19.65 | 0.0002562 | 0.008549 | ZT16, ZT4 |
| ENSMUSG00000030678 | Maz       | 0.52  | 0.34  | 11.10 | 11.62 | 11.02 | 11.36 | 19.64 | 0.000257  | 0.008552 | ZT16, ZT4 |
| ENSMUSG00000027199 | Gatm      | 0.23  | 0.43  | 16.24 | 16.46 | 15.87 | 16.29 | 19.58 | 0.00026   | 0.008597 | ZT16      |
| ENSMUSG00000022564 | Grina     | -0.38 | -0.33 | 14.98 | 14.60 | 15.15 | 14.82 | 19.58 | 0.0002601 | 0.008597 | ZT16, ZT4 |
| ENSMUSG00000009628 | Tex15     | 0.96  | 1.40  | 5.64  | 6.60  | 5.60  | 7.00  | 19.57 | 0.0002606 | 0.008597 | ZT16, ZT4 |

|                    |               |       |       |       |       |       |       |       |           |          |           |
|--------------------|---------------|-------|-------|-------|-------|-------|-------|-------|-----------|----------|-----------|
| ENSMUSG00000034245 | Hdac11        | 0.33  | 0.43  | 10.97 | 11.30 | 10.70 | 11.13 | 19.57 | 0.0002609 | 0.008597 | ZT16, ZT4 |
| ENSMUSG00000020068 | Pbld2         | -0.42 | -0.58 | 11.05 | 10.63 | 11.14 | 10.56 | 19.52 | 0.0002632 | 0.008651 | ZT16, ZT4 |
| ENSMUSG00000028982 | Slc25a33      | -0.30 | -0.50 | 9.34  | 9.05  | 9.72  | 9.22  | 19.41 | 0.0002701 | 0.008856 | ZT16, ZT4 |
| ENSMUSG00000042118 | Bhmt2         | 0.61  | 0.60  | 12.55 | 13.16 | 12.28 | 12.88 | 19.35 | 0.0002734 | 0.008942 | ZT16, ZT4 |
| ENSMUSG00000000876 | Pxmp4         | -0.59 | -0.47 | 12.98 | 12.39 | 13.15 | 12.68 | 19.32 | 0.0002753 | 0.008983 | ZT16, ZT4 |
| ENSMUSG00000029636 | Wasf3         | 0.68  | 0.77  | 8.40  | 9.08  | 8.02  | 8.79  | 19.29 | 0.0002768 | 0.009008 | ZT16, ZT4 |
| ENSMUSG00000030228 | Pik3c2g       | -0.81 | -0.43 | 9.09  | 8.28  | 9.10  | 8.66  | 19.25 | 0.0002795 | 0.009064 | ZT4       |
| ENSMUSG00000034613 | Ppm1h         | 0.65  | 0.88  | 11.96 | 12.61 | 11.33 | 12.21 | 19.24 | 0.0002798 | 0.009064 | ZT16, ZT4 |
| ENSMUSG00000008658 | Rbfox1        | -0.35 | -0.60 | 7.53  | 7.18  | 7.32  | 6.72  | 19.19 | 0.0002831 | 0.009147 | ZT16      |
| ENSMUSG00000029086 | Prom1         | 0.36  | 0.70  | 12.92 | 13.29 | 12.50 | 13.20 | 19.12 | 0.0002876 | 0.00927  | ZT16      |
| ENSMUSG00000027690 | Slc2a2        | -0.46 | -0.32 | 13.93 | 13.47 | 13.46 | 13.15 | 19.05 | 0.0002917 | 0.00938  | ZT16, ZT4 |
| ENSMUSG00000011382 | Dhdh          | -0.39 | -0.48 | 10.28 | 9.89  | 10.04 | 9.56  | 18.97 | 0.0002972 | 0.009533 | ZT16, ZT4 |
| ENSMUSG00000041272 | Tox           | 0.85  | 0.45  | 6.45  | 7.30  | 6.15  | 6.60  | 18.91 | 0.0003011 | 0.009616 | ZT4       |
| ENSMUSG00000002844 | Adprh         | 0.35  | 0.40  | 9.83  | 10.17 | 9.68  | 10.08 | 18.91 | 0.0003013 | 0.009616 | ZT16, ZT4 |
| ENSMUSG00000038775 | Vill          | 0.39  | 0.82  | 12.60 | 12.99 | 12.65 | 13.47 | 18.87 | 0.0003035 | 0.009649 | ZT16      |
| ENSMUSG00000020609 | Apob          | 0.41  | 0.48  | 14.53 | 14.94 | 14.70 | 15.18 | 18.84 | 0.0003054 | 0.009649 | ZT16, ZT4 |
| ENSMUSG00000036158 | Prickle1      | 0.66  | 0.52  | 8.68  | 9.34  | 8.71  | 9.23  | 18.84 | 0.0003056 | 0.009649 | ZT16, ZT4 |
| ENSMUSG00000039910 | Cited2        | 0.81  | 0.42  | 11.07 | 11.89 | 10.47 | 10.89 | 18.84 | 0.0003058 | 0.009649 | ZT4       |
| ENSMUSG00000079465 | Col4a3        | 0.66  | 0.89  | 14.24 | 14.90 | 13.74 | 14.63 | 18.84 | 0.0003059 | 0.009649 | ZT16, ZT4 |
| ENSMUSG00000044352 | Sowaha        | 0.53  | 0.47  | 6.62  | 7.15  | 6.30  | 6.77  | 18.78 | 0.0003101 | 0.009758 | ZT16, ZT4 |
| ENSMUSG00000068196 | Col8a1        | 0.48  | 0.51  | 9.73  | 10.21 | 9.17  | 9.68  | 18.66 | 0.0003183 | 0.009991 | ZT16, ZT4 |
| ENSMUSG00000004270 | Lpcat3        | -0.55 | -0.36 | 13.45 | 12.90 | 13.45 | 13.08 | 18.64 | 0.0003197 | 0.009998 | ZT16, ZT4 |
| ENSMUSG00000037458 | Azin1         | -0.41 | -0.32 | 13.66 | 13.25 | 13.97 | 13.65 | 18.64 | 0.00032   | 0.009998 | ZT16, ZT4 |
| ENSMUSG00000037108 | Zcwpw1        | 0.52  | 0.56  | 7.92  | 8.44  | 8.03  | 8.59  | 18.62 | 0.0003212 | 0.010013 | ZT16, ZT4 |
| ENSMUSG00000031402 | Mpp1          | -0.36 | -0.33 | 14.03 | 13.67 | 14.10 | 13.77 | 18.59 | 0.0003234 | 0.010058 | ZT16, ZT4 |
| ENSMUSG00000057766 | Ankrd29       | -0.38 | -0.31 | 10.33 | 9.95  | 10.51 | 10.20 | 18.57 | 0.000325  | 0.010084 | ZT16, ZT4 |
| ENSMUSG00000020434 | 4921536K21Rik | 0.46  | 0.88  | 6.53  | 6.99  | 5.81  | 6.69  | 18.46 | 0.0003327 | 0.010297 | ZT16      |
| ENSMUSG00000032826 | Ank2          | 0.44  | 0.45  | 8.72  | 9.17  | 8.65  | 9.11  | 18.45 | 0.0003334 | 0.010297 | ZT16, ZT4 |
| ENSMUSG00000032278 | Paqr5         | 0.19  | 0.39  | 12.75 | 12.94 | 12.89 | 13.27 | 18.41 | 0.0003367 | 0.010372 | ZT16      |
| ENSMUSG00000040740 | Slc25a34      | -0.50 | -0.60 | 10.54 | 10.03 | 10.72 | 10.12 | 18.39 | 0.0003381 | 0.010391 | ZT16, ZT4 |
| ENSMUSG00000015405 | Ace2          | 0.43  | 0.57  | 12.47 | 12.90 | 12.55 | 13.12 | 18.35 | 0.0003411 | 0.010461 | ZT16, ZT4 |
| ENSMUSG00000019856 | Fam184a       | 0.54  | 0.61  | 9.78  | 10.32 | 9.49  | 10.11 | 18.29 | 0.000346  | 0.010585 | ZT16, ZT4 |
| ENSMUSG00000034731 | Dgkh          | -0.77 | -0.92 | 8.11  | 7.34  | 8.91  | 7.99  | 18.27 | 0.0003475 | 0.010606 | ZT16, ZT4 |
| ENSMUSG00000074476 | Spc24         | -0.63 | -0.19 | 6.81  | 6.18  | 6.70  | 6.51  | 18.24 | 0.0003495 | 0.010646 | ZT4       |

|                    |          |       |       |       |       |       |       |       |           |          |           |
|--------------------|----------|-------|-------|-------|-------|-------|-------|-------|-----------|----------|-----------|
| ENSMUSG00000078695 | Cisd3    | -0.40 | -0.32 | 11.22 | 10.83 | 11.37 | 11.06 | 18.21 | 0.0003527 | 0.010717 | ZT16, ZT4 |
| ENSMUSG00000019874 | Fabp7    | 0.08  | 1.51  | 9.70  | 9.78  | 8.92  | 10.43 | 18.19 | 0.0003536 | 0.01072  | ZT16      |
| ENSMUSG00000022332 | Khdrbs3  | -0.37 | -0.45 | 10.54 | 10.17 | 10.71 | 10.26 | 18.11 | 0.0003601 | 0.010891 | ZT16, ZT4 |
| ENSMUSG00000019969 | Psen1    | -0.34 | -0.40 | 12.47 | 12.13 | 12.70 | 12.31 | 18.10 | 0.0003616 | 0.010912 | ZT16, ZT4 |
| ENSMUSG00000067653 | Ankrd23  | 0.36  | 0.56  | 7.72  | 8.08  | 7.40  | 7.96  | 18.08 | 0.0003629 | 0.010928 | ZT16, ZT4 |
| ENSMUSG00000021806 | Nid2     | 0.63  | 0.88  | 10.62 | 11.25 | 9.92  | 10.81 | 18.06 | 0.0003646 | 0.010952 | ZT16, ZT4 |
| ENSMUSG00000027130 | Slc12a6  | -0.18 | -0.51 | 12.30 | 12.12 | 12.96 | 12.45 | 18.05 | 0.0003655 | 0.010957 | ZT16      |
| ENSMUSG00000031147 | Magix    | 0.43  | 0.47  | 8.88  | 9.31  | 9.02  | 9.49  | 18.01 | 0.0003692 | 0.011032 | ZT16, ZT4 |
| ENSMUSG00000027967 | Neurog2  | -1.03 | -1.28 | 6.81  | 5.78  | 6.97  | 5.69  | 18.00 | 0.0003697 | 0.011032 | ZT16, ZT4 |
| ENSMUSG00000090877 | Hspa1b   | 0.21  | -1.38 | 9.78  | 9.99  | 12.29 | 10.91 | 17.98 | 0.0003711 | 0.01105  | ZT16      |
| ENSMUSG00000060002 | Chpt1    | -0.40 | -0.41 | 16.87 | 16.47 | 17.03 | 16.62 | 17.94 | 0.0003746 | 0.011128 | ZT16, ZT4 |
| ENSMUSG00000018931 | Gm16515  | 0.33  | 0.34  | 11.03 | 11.36 | 10.78 | 11.13 | 17.90 | 0.000378  | 0.011204 | ZT16, ZT4 |
| ENSMUSG00000061740 | Cyp2d22  | 0.39  | 0.40  | 10.75 | 11.14 | 10.92 | 11.33 | 17.83 | 0.0003843 | 0.011366 | ZT16, ZT4 |
| ENSMUSG00000037071 | Scd1     | -0.84 | -1.06 | 14.34 | 13.50 | 14.56 | 13.50 | 17.82 | 0.0003858 | 0.011385 | ZT16, ZT4 |
| ENSMUSG00000003617 | Cp       | 0.65  | 0.57  | 12.31 | 12.96 | 12.71 | 13.28 | 17.78 | 0.0003888 | 0.011449 | ZT16, ZT4 |
| ENSMUSG00000047409 | Ctdspl   | 0.41  | 0.36  | 11.81 | 12.22 | 11.23 | 11.59 | 17.77 | 0.0003899 | 0.011454 | ZT16, ZT4 |
| ENSMUSG00000075012 | Fjx1     | 0.46  | 0.64  | 8.20  | 8.67  | 7.94  | 8.58  | 17.75 | 0.0003918 | 0.011486 | ZT16, ZT4 |
| ENSMUSG00000018677 | Slc25a39 | -0.33 | -0.39 | 14.92 | 14.59 | 14.96 | 14.57 | 17.72 | 0.0003947 | 0.011545 | ZT16, ZT4 |
| ENSMUSG00000028158 | Mttp     | -0.42 | -0.35 | 11.28 | 10.86 | 11.63 | 11.28 | 17.70 | 0.000396  | 0.011558 | ZT16, ZT4 |
| ENSMUSG00000027993 | Trim2    | 0.42  | 0.40  | 11.77 | 12.19 | 11.57 | 11.97 | 17.66 | 0.0003998 | 0.011642 | ZT16, ZT4 |
| ENSMUSG00000030785 | Cox6a2   | -0.35 | -0.97 | 6.19  | 5.84  | 6.29  | 5.32  | 17.58 | 0.0004073 | 0.011835 | ZT16      |
| ENSMUSG00000032340 | Neo1     | 0.39  | 0.39  | 11.73 | 12.12 | 11.48 | 11.87 | 17.57 | 0.0004083 | 0.011837 | ZT16, ZT4 |
| ENSMUSG00000050199 | Lgr4     | 0.30  | 0.37  | 13.67 | 13.97 | 13.26 | 13.63 | 17.55 | 0.0004101 | 0.011864 | ZT16, ZT4 |
| ENSMUSG00000025534 | Gusb     | -0.67 | -0.44 | 12.26 | 11.60 | 12.24 | 11.79 | 17.54 | 0.0004113 | 0.011873 | ZT16, ZT4 |
| ENSMUSG00000031398 | Plxna3   | 0.87  | 0.46  | 7.12  | 7.99  | 7.19  | 7.65  | 17.53 | 0.0004126 | 0.011886 | ZT4       |
| ENSMUSG00000070003 | Ssbp4    | 0.64  | 0.42  | 8.91  | 9.55  | 8.78  | 9.20  | 17.50 | 0.0004153 | 0.011938 | ZT16, ZT4 |
| ENSMUSG00000024521 | Pmaip1   | -0.78 | -0.75 | 10.37 | 9.59  | 10.81 | 10.06 | 17.42 | 0.0004236 | 0.012148 | ZT16, ZT4 |
| ENSMUSG00000036894 | Rap2b    | 0.41  | 0.36  | 7.84  | 8.25  | 7.23  | 7.58  | 17.35 | 0.0004305 | 0.012322 | ZT16, ZT4 |
| ENSMUSG00000028410 | Dnaja1   | -0.32 | -0.53 | 12.77 | 12.45 | 13.76 | 13.23 | 17.31 | 0.000434  | 0.012394 | ZT16      |
| ENSMUSG00000027356 | Fermt1   | 0.34  | 0.44  | 11.37 | 11.71 | 11.27 | 11.71 | 17.30 | 0.0004352 | 0.012402 | ZT16, ZT4 |
| ENSMUSG00000042116 | Vwa1     | -0.37 | -0.53 | 11.77 | 11.40 | 12.22 | 11.69 | 17.28 | 0.0004374 | 0.012438 | ZT16, ZT4 |
| ENSMUSG00000004668 | Abca13   | -0.48 | -0.50 | 13.50 | 13.01 | 13.58 | 13.09 | 17.20 | 0.0004453 | 0.012636 | ZT16, ZT4 |
| ENSMUSG00000037016 | Frem2    | 0.70  | 0.71  | 9.80  | 10.50 | 9.32  | 10.03 | 17.12 | 0.0004549 | 0.012879 | ZT16, ZT4 |
| ENSMUSG00000049191 | Rgag4    | 0.88  | 0.61  | 8.71  | 9.59  | 8.46  | 9.07  | 17.08 | 0.0004585 | 0.012954 | ZT16, ZT4 |

|                     |          |       |       |       |       |       |       |       |           |          |           |
|---------------------|----------|-------|-------|-------|-------|-------|-------|-------|-----------|----------|-----------|
| ENSMUSG00000030525  | Chrna7   | 0.94  | 0.78  | 5.14  | 6.08  | 5.75  | 6.53  | 17.03 | 0.0004639 | 0.013078 | ZT16, ZT4 |
| ENSMUSG00000002257  | Def6     | 0.47  | 0.69  | 7.44  | 7.91  | 7.00  | 7.68  | 17.01 | 0.000467  | 0.013137 | ZT16, ZT4 |
| ENSMUSG00000022602  | Arc      | 0.05  | -2.09 | 6.98  | 7.03  | 8.89  | 6.80  | 16.99 | 0.0004689 | 0.013164 | ZT16      |
| ENSMUSG00000001761  | Smo      | 0.34  | 0.46  | 11.19 | 11.53 | 10.69 | 11.15 | 16.97 | 0.0004706 | 0.013183 | ZT16, ZT4 |
| ENSMUSG000000041720 | Pi4ka    | 0.69  | 0.78  | 13.68 | 14.37 | 13.13 | 13.91 | 16.89 | 0.0004806 | 0.013437 | ZT16, ZT4 |
| ENSMUSG000000011305 | Plin5    | -0.89 | -0.72 | 8.25  | 7.36  | 8.38  | 7.66  | 16.86 | 0.0004843 | 0.01351  | ZT16, ZT4 |
| ENSMUSG000000024781 | Lipa     | -0.44 | -0.58 | 14.94 | 14.50 | 15.09 | 14.51 | 16.77 | 0.0004941 | 0.013726 | ZT16, ZT4 |
| ENSMUSG000000022351 | Sqle     | -0.51 | -0.47 | 12.61 | 12.10 | 12.71 | 12.24 | 16.77 | 0.0004941 | 0.013726 | ZT16, ZT4 |
| ENSMUSG000000042797 | Aqp11    | -0.37 | -0.47 | 11.40 | 11.02 | 11.56 | 11.09 | 16.76 | 0.0004956 | 0.013726 | ZT16, ZT4 |
| ENSMUSG000000030603 | Psmc4    | -0.42 | -0.22 | 13.02 | 12.60 | 13.15 | 12.92 | 16.76 | 0.0004962 | 0.013726 | ZT4       |
| ENSMUSG000000060639 | Hist1h4i | -0.65 | -0.60 | 7.79  | 7.14  | 8.19  | 7.59  | 16.74 | 0.0004975 | 0.013735 | ZT16, ZT4 |
| ENSMUSG000000020828 | Pld2     | 0.40  | 0.27  | 8.99  | 9.39  | 8.94  | 9.21  | 16.73 | 0.0004995 | 0.01376  | ZT16, ZT4 |
| ENSMUSG000000021336 | Slc17a4  | 0.56  | 0.86  | 9.27  | 9.83  | 8.35  | 9.21  | 16.69 | 0.0005038 | 0.013851 | ZT16      |
| ENSMUSG000000016239 | Lonrf3   | 1.08  | 0.12  | 7.29  | 8.37  | 8.72  | 8.84  | 16.66 | 0.0005075 | 0.013905 | ZT4       |
| ENSMUSG000000022583 | Ly6f     | -1.85 | -1.74 | 5.79  | 3.95  | 6.60  | 4.86  | 16.65 | 0.000509  | 0.013905 | ZT16, ZT4 |
| ENSMUSG000000024621 | Csf1r    | -0.34 | -0.33 | 12.40 | 12.06 | 12.26 | 11.93 | 16.64 | 0.0005108 | 0.013905 | ZT16, ZT4 |
| ENSMUSG000000044626 | Liph     | 1.28  | 0.62  | 4.71  | 6.00  | 4.78  | 5.40  | 16.64 | 0.0005109 | 0.013905 | ZT4       |
| ENSMUSG000000041075 | Fzd7     | 0.67  | 0.28  | 9.97  | 10.64 | 9.76  | 10.05 | 16.63 | 0.000511  | 0.013905 | ZT4       |
| ENSMUSG000000060703 | Cd302    | -0.59 | -0.82 | 11.94 | 11.34 | 12.56 | 11.74 | 16.61 | 0.0005145 | 0.013972 | ZT16, ZT4 |
| ENSMUSG000000027698 | Nceh1    | -0.33 | -0.30 | 14.38 | 14.05 | 14.42 | 14.12 | 16.60 | 0.0005159 | 0.01398  | ZT16, ZT4 |
| ENSMUSG000000020186 | Csrp2    | -0.56 | -0.56 | 12.92 | 12.37 | 13.35 | 12.80 | 16.57 | 0.0005196 | 0.014052 | ZT16, ZT4 |
| ENSMUSG000000025921 | Rdh10    | 0.30  | 0.47  | 12.28 | 12.59 | 12.28 | 12.74 | 16.54 | 0.0005231 | 0.014118 | ZT16      |
| ENSMUSG000000086784 | Isoc2a   | -0.44 | -0.57 | 13.37 | 12.93 | 13.60 | 13.03 | 16.51 | 0.0005262 | 0.01416  | ZT16, ZT4 |
| ENSMUSG000000004655 | Aqp1     | -0.32 | -0.30 | 16.06 | 15.74 | 16.36 | 16.06 | 16.51 | 0.0005274 | 0.01416  | ZT16, ZT4 |
| ENSMUSG000000024151 | Msh2     | 0.36  | 0.41  | 9.82  | 10.18 | 9.45  | 9.86  | 16.50 | 0.0005278 | 0.01416  | ZT16, ZT4 |
| ENSMUSG000000040820 | Hlcs     | 0.24  | 0.50  | 9.18  | 9.43  | 8.56  | 9.06  | 16.48 | 0.0005304 | 0.014199 | ZT16      |
| ENSMUSG000000031217 | Efnb1    | 0.42  | 0.38  | 10.14 | 10.56 | 10.12 | 10.49 | 16.44 | 0.0005359 | 0.014314 | ZT16, ZT4 |
| ENSMUSG000000001700 | Gramd3   | -0.25 | -0.36 | 11.44 | 11.19 | 11.63 | 11.27 | 16.43 | 0.0005368 | 0.014314 | ZT16, ZT4 |
| ENSMUSG000000001334 | Fndc5    | 0.58  | 0.68  | 7.55  | 8.13  | 7.48  | 8.16  | 16.42 | 0.0005392 | 0.014348 | ZT16, ZT4 |
| ENSMUSG000000043088 | Il17re   | 0.60  | 0.69  | 9.00  | 9.60  | 8.94  | 9.64  | 16.41 | 0.0005404 | 0.014351 | ZT16, ZT4 |
| ENSMUSG000000039835 | Nhs1     | 0.58  | 0.64  | 10.69 | 11.26 | 10.24 | 10.88 | 16.39 | 0.0005421 | 0.014369 | ZT16, ZT4 |
| ENSMUSG000000055799 | Tcf7l1   | 0.59  | 0.76  | 7.95  | 8.54  | 7.30  | 8.06  | 16.37 | 0.0005458 | 0.014437 | ZT16, ZT4 |
| ENSMUSG000000002324 | Rec8     | 0.39  | 0.46  | 9.09  | 9.48  | 9.11  | 9.57  | 16.34 | 0.0005491 | 0.014495 | ZT16, ZT4 |
| ENSMUSG000000040183 | Ankrd6   | -0.28 | -0.65 | 8.27  | 7.99  | 8.52  | 7.86  | 16.32 | 0.0005518 | 0.014539 | ZT16      |



|                    |               |       |       |       |       |       |       |       |           |          |           |
|--------------------|---------------|-------|-------|-------|-------|-------|-------|-------|-----------|----------|-----------|
| ENSMUSG00000036957 | Lrfn3         | 1.07  | 1.16  | 7.29  | 8.37  | 6.82  | 7.98  | 16.28 | 0.0005573 | 0.014624 | ZT16, ZT4 |
| ENSMUSG00000026107 | Nabp1         | -0.47 | -0.27 | 12.55 | 12.08 | 12.60 | 12.33 | 16.28 | 0.0005583 | 0.014624 | ZT4       |
| ENSMUSG00000020782 | Ligl2         | 0.35  | 0.60  | 12.48 | 12.82 | 12.24 | 12.84 | 16.27 | 0.0005584 | 0.014624 | ZT16      |
| ENSMUSG00000016194 | Hsd11b1       | -1.26 | -1.05 | 13.44 | 12.18 | 13.76 | 12.71 | 16.19 | 0.0005708 | 0.01492  | ZT16, ZT4 |
| ENSMUSG00000028571 | Cyp2j13       | -0.56 | -0.54 | 14.81 | 14.26 | 15.14 | 14.60 | 16.07 | 0.0005875 | 0.015306 | ZT16, ZT4 |
| ENSMUSG00000021311 | Mtr           | 0.34  | 0.59  | 10.71 | 11.05 | 10.54 | 11.14 | 16.07 | 0.0005878 | 0.015306 | ZT16      |
| ENSMUSG00000048911 | Rnf24         | -0.87 | -0.89 | 12.32 | 11.45 | 12.32 | 11.43 | 16.06 | 0.0005892 | 0.015312 | ZT16, ZT4 |
| ENSMUSG00000051278 | 4930422G04Rik | 0.26  | 0.46  | 6.88  | 7.14  | 6.29  | 6.75  | 16.04 | 0.0005921 | 0.015356 | ZT16      |
| ENSMUSG00000074435 | Smcp          | -1.01 | -0.81 | 8.06  | 7.05  | 8.54  | 7.73  | 16.03 | 0.0005934 | 0.01536  | ZT16, ZT4 |
| ENSMUSG00000021178 | Psmc1         | -0.36 | -0.29 | 12.78 | 12.41 | 12.91 | 12.61 | 16.01 | 0.0005966 | 0.015414 | ZT16, ZT4 |
| ENSMUSG00000068037 | Mas1          | -0.79 | -0.12 | 7.80  | 7.01  | 6.55  | 6.43  | 15.98 | 0.000601  | 0.015495 | ZT4       |
| ENSMUSG00000026435 | Slc45a3       | 0.60  | 0.55  | 11.29 | 11.89 | 11.32 | 11.87 | 15.95 | 0.0006055 | 0.015581 | ZT16, ZT4 |
| ENSMUSG00000058952 | Cfi           | 0.63  | 0.51  | 8.99  | 9.62  | 9.18  | 9.69  | 15.92 | 0.0006099 | 0.015647 | ZT16, ZT4 |
| ENSMUSG00000058420 | Syt17         | 0.46  | 0.92  | 7.41  | 7.87  | 7.09  | 8.00  | 15.92 | 0.0006104 | 0.015647 | ZT16      |
| ENSMUSG00000048915 | Efna5         | 0.86  | 0.81  | 5.95  | 6.81  | 5.33  | 6.13  | 15.89 | 0.0006146 | 0.015723 | ZT16, ZT4 |
| ENSMUSG00000022595 | Lypd2         | 0.68  | 0.27  | 6.58  | 7.25  | 6.47  | 6.74  | 15.88 | 0.0006157 | 0.015723 | ZT4       |
| ENSMUSG00000042156 | Dzip1         | 0.70  | 0.52  | 7.82  | 8.52  | 7.55  | 8.08  | 15.79 | 0.00063   | 0.016057 | ZT16, ZT4 |
| ENSMUSG00000043342 | Hoxd9         | 0.44  | 0.32  | 10.08 | 10.52 | 10.28 | 10.59 | 15.75 | 0.0006379 | 0.016227 | ZT16, ZT4 |
| ENSMUSG00000029919 | Hpgds         | -0.68 | -0.78 | 7.67  | 6.98  | 7.48  | 6.70  | 15.71 | 0.0006434 | 0.016328 | ZT16, ZT4 |
| ENSMUSG00000031880 | Rrad          | -0.35 | -0.73 | 7.23  | 6.88  | 7.20  | 6.47  | 15.71 | 0.0006443 | 0.016328 | ZT16      |
| ENSMUSG00000028399 | Ptprd         | -0.12 | -0.47 | 13.15 | 13.03 | 13.54 | 13.08 | 15.67 | 0.0006496 | 0.016429 | ZT16      |
| ENSMUSG00000017713 | Tha1          | -0.33 | -0.25 | 9.55  | 9.22  | 9.85  | 9.59  | 15.57 | 0.0006664 | 0.016823 | ZT16, ZT4 |
| ENSMUSG00000031775 | Plip          | -0.56 | 0.03  | 11.39 | 10.83 | 11.04 | 11.07 | 15.55 | 0.0006698 | 0.016877 | ZT4       |
| ENSMUSG00000031202 | Rab39b        | 0.30  | 0.46  | 6.83  | 7.13  | 7.12  | 7.58  | 15.54 | 0.0006716 | 0.016892 | ZT16      |
| ENSMUSG00000039824 | Myl6b         | -0.77 | -0.62 | 8.84  | 8.07  | 8.33  | 7.71  | 15.49 | 0.0006809 | 0.017092 | ZT16, ZT4 |
| ENSMUSG00000055555 | 4930502E18Rik | -2.05 | -1.74 | 6.98  | 4.93  | 7.68  | 5.94  | 15.45 | 0.000688  | 0.017236 | ZT16, ZT4 |
| ENSMUSG00000020774 | Aspa          | -1.08 | -1.16 | 13.53 | 12.45 | 13.76 | 12.60 | 15.44 | 0.0006892 | 0.017236 | ZT16, ZT4 |
| ENSMUSG00000049353 | Rd3           | 1.08  | 0.60  | 4.69  | 5.77  | 4.85  | 5.45  | 15.41 | 0.0006953 | 0.017355 | ZT4       |
| ENSMUSG00000032377 | Plscr4        | -0.24 | -0.36 | 11.10 | 10.87 | 11.33 | 10.97 | 15.36 | 0.0007047 | 0.017557 | ZT16      |
| ENSMUSG00000042487 | Leo1          | 0.46  | 0.36  | 9.79  | 10.26 | 9.90  | 10.26 | 15.31 | 0.0007127 | 0.017723 | ZT16, ZT4 |
| ENSMUSG00000073434 | Wdr90         | 0.63  | 0.80  | 8.73  | 9.36  | 8.30  | 9.10  | 15.30 | 0.0007162 | 0.017776 | ZT16, ZT4 |
| ENSMUSG00000047281 | Sfn           | 0.42  | 0.39  | 8.21  | 8.63  | 8.46  | 8.85  | 15.28 | 0.0007199 | 0.017834 | ZT16, ZT4 |
| ENSMUSG00000003948 | Mmd           | 0.45  | 0.17  | 10.21 | 10.66 | 10.04 | 10.21 | 15.27 | 0.0007213 | 0.017835 | ZT4       |
| ENSMUSG00000036169 | Sostdc1       | 0.58  | 0.44  | 11.82 | 12.40 | 11.15 | 11.60 | 15.26 | 0.0007231 | 0.017848 | ZT16, ZT4 |

|                    |               |       |       |       |       |       |       |       |           |          |           |
|--------------------|---------------|-------|-------|-------|-------|-------|-------|-------|-----------|----------|-----------|
| ENSMUSG00000041052 | Slc7a13       | -0.73 | -0.56 | 16.21 | 15.48 | 16.58 | 16.02 | 15.25 | 0.0007253 | 0.017849 | ZT16, ZT4 |
| ENSMUSG00000039286 | Fndc3b        | 0.34  | 0.38  | 11.62 | 11.96 | 11.57 | 11.95 | 15.24 | 0.0007258 | 0.017849 | ZT16, ZT4 |
| ENSMUSG00000021062 | Rab15         | 0.79  | 0.51  | 7.95  | 8.74  | 7.93  | 8.43  | 15.16 | 0.0007413 | 0.018196 | ZT4       |
| ENSMUSG00000014905 | Dnajb9        | -0.27 | -0.45 | 11.88 | 11.61 | 12.70 | 12.25 | 15.13 | 0.0007478 | 0.018308 | ZT16      |
| ENSMUSG00000024042 | Sik1          | -0.33 | -1.00 | 10.96 | 10.64 | 11.63 | 10.63 | 15.12 | 0.0007489 | 0.018308 | ZT16      |
| ENSMUSG00000031886 | Ces2e         | -0.70 | -0.47 | 10.41 | 9.71  | 10.66 | 10.19 | 15.12 | 0.00075   | 0.018308 | ZT4       |
| ENSMUSG00000034854 | Mfsd12        | 0.36  | 0.54  | 9.16  | 9.52  | 9.11  | 9.65  | 15.09 | 0.0007555 | 0.018396 | ZT16      |
| ENSMUSG00000017724 | Etv4          | 0.97  | 0.90  | 6.10  | 7.07  | 5.88  | 6.77  | 15.09 | 0.0007564 | 0.018396 | ZT16, ZT4 |
| ENSMUSG00000045294 | Insig1        | -0.36 | -0.92 | 11.52 | 11.16 | 12.06 | 11.14 | 15.05 | 0.0007642 | 0.018519 | ZT16      |
| ENSMUSG00000006390 | Elovl1        | -0.39 | -0.26 | 12.97 | 12.58 | 12.96 | 12.70 | 15.04 | 0.000766  | 0.018519 | ZT4       |
| ENSMUSG00000023019 | Gpd1          | -0.29 | -0.20 | 14.93 | 14.63 | 15.13 | 14.93 | 15.02 | 0.0007687 | 0.018519 | ZT4       |
| ENSMUSG00000034930 | Rtkn          | -0.16 | -0.70 | 10.53 | 10.36 | 10.94 | 10.24 | 15.02 | 0.0007697 | 0.018519 | ZT16      |
| ENSMUSG00000028341 | Nr4a3         | -0.31 | -1.28 | 4.57  | 4.26  | 6.04  | 4.76  | 15.02 | 0.0007698 | 0.018519 | ZT16      |
| ENSMUSG00000031698 | Mylk3         | -0.48 | -0.89 | 8.04  | 7.56  | 8.39  | 7.50  | 15.02 | 0.0007707 | 0.018519 | ZT16      |
| ENSMUSG00000001768 | Rin2          | 0.31  | 0.49  | 12.07 | 12.39 | 11.82 | 12.31 | 15.01 | 0.0007712 | 0.018519 | ZT16      |
| ENSMUSG00000048482 | Bdnf          | -0.77 | -0.77 | 8.51  | 7.74  | 9.07  | 8.30  | 15.00 | 0.0007747 | 0.018553 | ZT16, ZT4 |
| ENSMUSG00000020467 | Efemp1        | 0.47  | 0.23  | 10.36 | 10.83 | 10.67 | 10.90 | 14.99 | 0.0007754 | 0.018553 | ZT4       |
| ENSMUSG00000022464 | Slc38a4       | -0.84 | -0.57 | 9.16  | 8.31  | 9.08  | 8.52  | 14.98 | 0.0007788 | 0.0186   | ZT4       |
| ENSMUSG00000062480 | Acat3         | -0.53 | -0.52 | 9.66  | 9.13  | 10.47 | 9.95  | 14.89 | 0.0007963 | 0.018981 | ZT16, ZT4 |
| ENSMUSG00000020080 | Hkdc1         | 0.42  | 0.55  | 7.35  | 7.77  | 7.38  | 7.93  | 14.89 | 0.0007976 | 0.018981 | ZT16, ZT4 |
| ENSMUSG00000026600 | Soat1         | 0.38  | 0.26  | 10.31 | 10.70 | 10.19 | 10.45 | 14.87 | 0.0008006 | 0.019018 | ZT4       |
| ENSMUSG00000046432 | Ngfrap1       | 0.50  | 0.44  | 9.43  | 9.92  | 9.21  | 9.64  | 14.83 | 0.0008092 | 0.01917  | ZT16, ZT4 |
| ENSMUSG00000090369 | 4933411K16Rik | 0.67  | 0.65  | 5.72  | 6.39  | 5.58  | 6.23  | 14.82 | 0.0008114 | 0.01917  | ZT16, ZT4 |
| ENSMUSG00000039960 | Rhou          | 0.75  | 0.25  | 7.31  | 8.06  | 7.77  | 8.03  | 14.82 | 0.0008114 | 0.01917  | ZT4       |
| ENSMUSG00000029206 | Nsun7         | 0.80  | 0.95  | 5.72  | 6.52  | 5.02  | 5.96  | 14.81 | 0.0008128 | 0.01917  | ZT16, ZT4 |
| ENSMUSG00000042282 | Gucy2f        | 0.86  | 1.38  | 5.05  | 5.91  | 3.72  | 5.10  | 14.78 | 0.0008201 | 0.019289 | ZT16      |
| ENSMUSG00000020733 | Slc9a3r1      | -0.26 | -0.27 | 14.44 | 14.17 | 14.64 | 14.37 | 14.78 | 0.0008207 | 0.019289 | ZT16, ZT4 |
| ENSMUSG00000019832 | Rab32         | -0.50 | -0.31 | 10.36 | 9.87  | 10.26 | 9.95  | 14.75 | 0.0008275 | 0.01938  | ZT4       |
| ENSMUSG00000035004 | Igsf6         | -0.41 | -0.62 | 6.46  | 6.05  | 6.31  | 5.69  | 14.75 | 0.0008279 | 0.01938  | ZT16      |
| ENSMUSG00000033685 | Ucp2          | -0.74 | -1.11 | 12.81 | 12.07 | 12.87 | 11.76 | 14.74 | 0.000829  | 0.01938  | ZT16      |
| ENSMUSG00000025150 | Cbr2          | -0.75 | -0.62 | 7.59  | 6.84  | 7.80  | 7.17  | 14.73 | 0.0008313 | 0.0194   | ZT16, ZT4 |
| ENSMUSG00000023905 | Tnfrsf12a     | -0.80 | -0.69 | 10.09 | 9.28  | 10.79 | 10.09 | 14.71 | 0.0008355 | 0.019462 | ZT16, ZT4 |
| ENSMUSG00000031384 | Asb9          | 0.30  | 1.10  | 11.17 | 11.47 | 10.50 | 11.60 | 14.70 | 0.000837  | 0.019462 | ZT16      |
| ENSMUSG00000023044 | Csad          | -0.48 | -0.29 | 14.32 | 13.84 | 14.26 | 13.97 | 14.70 | 0.0008383 | 0.019462 | ZT4       |

|                    |               |       |       |       |       |       |       |       |           |          |           |
|--------------------|---------------|-------|-------|-------|-------|-------|-------|-------|-----------|----------|-----------|
| ENSMUSG00000040569 | Slc26a7       | -1.03 | -0.31 | 8.61  | 7.58  | 8.04  | 7.73  | 14.69 | 0.0008407 | 0.019483 | ZT4       |
| ENSMUSG00000015843 | Rxrg          | -2.25 | -0.68 | 5.67  | 3.42  | 5.01  | 4.33  | 14.67 | 0.0008451 | 0.019529 | ZT4       |
| ENSMUSG00000061825 | Ces2c         | -0.67 | -0.54 | 12.83 | 12.16 | 13.18 | 12.64 | 14.67 | 0.0008456 | 0.019529 | ZT16, ZT4 |
| ENSMUSG00000026255 | Efh1          | 0.41  | 0.38  | 12.47 | 12.88 | 12.65 | 13.03 | 14.65 | 0.0008501 | 0.019597 | ZT16, ZT4 |
| ENSMUSG00000039648 | Ccbl1         | -0.50 | -0.60 | 12.75 | 12.25 | 12.96 | 12.36 | 14.61 | 0.0008578 | 0.01974  | ZT16, ZT4 |
| ENSMUSG00000067071 | Hes6          | -0.54 | -0.55 | 11.50 | 10.96 | 11.81 | 11.26 | 14.60 | 0.000861  | 0.019758 | ZT16, ZT4 |
| ENSMUSG00000039323 | Igfbp2        | 0.89  | 0.88  | 7.11  | 8.00  | 7.47  | 8.36  | 14.60 | 0.0008615 | 0.019758 | ZT16, ZT4 |
| ENSMUSG00000025511 | Tspan4        | -0.42 | -0.69 | 11.43 | 11.01 | 12.23 | 11.54 | 14.57 | 0.0008677 | 0.019867 | ZT16      |
| ENSMUSG00000012123 | Aim1l         | -1.59 | -1.68 | 6.35  | 4.76  | 6.13  | 4.45  | 14.56 | 0.0008693 | 0.019869 | ZT16, ZT4 |
| ENSMUSG00000079277 | Hoxd3         | 0.72  | 0.43  | 10.16 | 10.88 | 10.18 | 10.62 | 14.52 | 0.0008795 | 0.020068 | ZT4       |
| ENSMUSG00000073755 | 5730409E04Rik | 0.24  | 0.59  | 8.57  | 8.82  | 8.20  | 8.79  | 14.47 | 0.0008915 | 0.020262 | ZT16      |
| ENSMUSG00000018736 | Ndel1         | -0.19 | -0.37 | 13.09 | 12.90 | 13.39 | 13.02 | 14.46 | 0.0008929 | 0.020262 | ZT16      |
| ENSMUSG00000022040 | Ephx2         | -0.66 | -0.65 | 15.28 | 14.62 | 15.70 | 15.05 | 14.46 | 0.000893  | 0.020262 | ZT16, ZT4 |
| ENSMUSG00000074063 | Osgin1        | -0.38 | -0.84 | 11.88 | 11.49 | 12.82 | 11.98 | 14.46 | 0.0008941 | 0.020262 | ZT16      |
| ENSMUSG00000000326 | Comt          | 0.06  | 0.47  | 13.94 | 14.00 | 13.53 | 14.00 | 14.41 | 0.000906  | 0.020495 | ZT16      |
| ENSMUSG00000056116 | H2-T22        | -0.33 | -0.23 | 12.36 | 12.03 | 12.41 | 12.18 | 14.40 | 0.0009075 | 0.020495 | ZT4       |
| ENSMUSG00000028979 | Masp2         | -1.68 | -1.82 | 6.23  | 4.55  | 6.34  | 4.52  | 14.37 | 0.0009149 | 0.020627 | ZT16, ZT4 |
| ENSMUSG00000018012 | Rac3          | 0.88  | 0.16  | 6.06  | 6.94  | 6.42  | 6.58  | 14.34 | 0.0009236 | 0.020786 | ZT4       |
| ENSMUSG00000039519 | Cyp7b1        | 0.41  | 0.75  | 14.03 | 14.44 | 14.06 | 14.81 | 14.33 | 0.0009257 | 0.020797 | ZT16      |
| ENSMUSG00000043885 | Slc36a4       | 0.35  | 0.19  | 10.04 | 10.39 | 9.84  | 10.04 | 14.33 | 0.0009272 | 0.020797 | ZT4       |
| ENSMUSG00000022218 | Tgm1          | -0.60 | -0.51 | 10.79 | 10.19 | 11.10 | 10.59 | 14.32 | 0.0009295 | 0.020815 | ZT16, ZT4 |
| ENSMUSG00000003541 | Ier3          | -0.23 | -0.71 | 10.89 | 10.66 | 11.88 | 11.17 | 14.31 | 0.0009323 | 0.020827 | ZT16      |
| ENSMUSG00000050737 | Ptges         | 0.37  | 0.53  | 10.43 | 10.81 | 10.10 | 10.62 | 14.30 | 0.0009332 | 0.020827 | ZT16      |
| ENSMUSG00000034308 | Sdr42e1       | 0.15  | 0.58  | 8.84  | 8.99  | 8.33  | 8.90  | 14.29 | 0.0009367 | 0.020871 | ZT16      |
| ENSMUSG00000041700 | Lhfpl1        | 0.38  | 1.20  | 5.12  | 5.51  | 4.93  | 6.14  | 14.20 | 0.0009593 | 0.021338 | ZT16      |
| ENSMUSG00000029108 | Pcdh7         | 0.54  | 0.55  | 8.59  | 9.13  | 8.11  | 8.65  | 14.17 | 0.0009675 | 0.02148  | ZT16, ZT4 |
| ENSMUSG00000050022 | Amz1          | -0.89 | -0.36 | 7.96  | 7.07  | 6.74  | 6.38  | 14.17 | 0.000969  | 0.02148  | ZT4       |
| ENSMUSG00000022948 | Setd4         | 0.66  | 0.47  | 7.05  | 7.71  | 7.17  | 7.64  | 14.14 | 0.0009752 | 0.021584 | ZT4       |
| ENSMUSG00000002393 | Nr2f6         | 0.67  | 0.10  | 11.62 | 12.29 | 11.85 | 11.95 | 14.11 | 0.0009835 | 0.02173  | ZT4       |
| ENSMUSG00000045064 | Zc2hc1c       | 0.54  | 0.49  | 9.40  | 9.94  | 9.24  | 9.74  | 14.09 | 0.0009885 | 0.021805 | ZT16, ZT4 |
| ENSMUSG00000035849 | Krt222        | -1.03 | -0.84 | 6.61  | 5.58  | 6.04  | 5.20  | 14.07 | 0.0009942 | 0.021889 | ZT16, ZT4 |
| ENSMUSG00000019734 | Tmc4          | 0.47  | 0.31  | 11.38 | 11.84 | 11.66 | 11.97 | 14.07 | 0.0009961 | 0.021889 | ZT4       |
| ENSMUSG00000000325 | Arvcf         | 0.25  | 0.67  | 11.60 | 11.85 | 11.11 | 11.78 | 14.06 | 0.0009973 | 0.021889 | ZT16      |
| ENSMUSG00000079445 | B3gnt7        | 0.22  | 0.56  | 8.07  | 8.28  | 7.96  | 8.53  | 14.04 | 0.0010017 | 0.02195  | ZT16      |

|                    |               |       |       |       |       |       |       |       |           |          |           |
|--------------------|---------------|-------|-------|-------|-------|-------|-------|-------|-----------|----------|-----------|
| ENSMUSG00000038777 | Sema6c        | 0.93  | 0.39  | 6.51  | 7.45  | 6.06  | 6.46  | 14.03 | 0.0010068 | 0.022024 | ZT4       |
| ENSMUSG00000043085 | Tmem82        | -0.24 | -0.28 | 10.42 | 10.18 | 10.52 | 10.24 | 14.01 | 0.0010116 | 0.022094 | ZT16, ZT4 |
| ENSMUSG00000000154 | Slc22a18      | -0.45 | -0.26 | 15.22 | 14.77 | 15.25 | 14.99 | 13.98 | 0.0010209 | 0.022227 | ZT4       |
| ENSMUSG00000056501 | Cebpb         | 0.97  | -0.51 | 7.40  | 8.37  | 8.30  | 7.79  | 13.98 | 0.0010211 | 0.022227 | ZT4       |
| ENSMUSG00000055312 | 0610012H03Rik | -0.42 | -0.30 | 13.51 | 13.09 | 13.71 | 13.41 | 13.94 | 0.0010299 | 0.022347 | ZT4       |
| ENSMUSG00000022231 | Sema5a        | 0.41  | 0.38  | 11.39 | 11.80 | 10.97 | 11.34 | 13.94 | 0.0010299 | 0.022347 | ZT16, ZT4 |
| ENSMUSG00000021061 | Sptb          | 0.27  | 0.46  | 7.93  | 8.21  | 6.91  | 7.37  | 13.94 | 0.0010322 | 0.022359 | ZT16      |
| ENSMUSG00000050097 | Ces2b         | -0.66 | -0.70 | 9.71  | 9.05  | 10.10 | 9.40  | 13.90 | 0.0010436 | 0.022569 | ZT16, ZT4 |
| ENSMUSG00000038569 | Rad9b         | 0.53  | 0.37  | 7.96  | 8.49  | 7.94  | 8.31  | 13.87 | 0.0010516 | 0.022675 | ZT4       |
| ENSMUSG00000021565 | Slc6a19       | -0.60 | -0.38 | 15.40 | 14.80 | 14.55 | 14.17 | 13.87 | 0.0010519 | 0.022675 | ZT4       |
| ENSMUSG00000026542 | Apcs          | 0.64  | 1.50  | 6.90  | 7.55  | 6.25  | 7.75  | 13.86 | 0.0010554 | 0.022714 | ZT16      |
| ENSMUSG00000010048 | Ifrd2         | -0.56 | -0.30 | 11.82 | 11.26 | 12.01 | 11.71 | 13.81 | 0.0010693 | 0.022976 | ZT4       |
| ENSMUSG00000026664 | Phyh          | -0.33 | -0.42 | 15.28 | 14.95 | 15.51 | 15.09 | 13.77 | 0.0010818 | 0.023208 | ZT16, ZT4 |
| ENSMUSG00000007570 | Fance         | 0.32  | 0.39  | 8.95  | 9.26  | 8.71  | 9.10  | 13.75 | 0.0010886 | 0.023315 | ZT16, ZT4 |
| ENSMUSG00000014329 | Bicc1         | 0.43  | 0.57  | 13.06 | 13.49 | 12.65 | 13.23 | 13.73 | 0.0010933 | 0.023378 | ZT16      |
| ENSMUSG00000068323 | Slc4a5        | 0.72  | 0.83  | 6.13  | 6.85  | 5.91  | 6.74  | 13.71 | 0.001099  | 0.023462 | ZT16, ZT4 |
| ENSMUSG00000022199 | Slc22a17      | 0.54  | 0.53  | 10.35 | 10.89 | 10.17 | 10.69 | 13.68 | 0.00111   | 0.023626 | ZT16, ZT4 |
| ENSMUSG00000030091 | Nup210        | 0.53  | 0.54  | 10.77 | 11.31 | 10.08 | 10.63 | 13.68 | 0.0011102 | 0.023626 | ZT16, ZT4 |
| ENSMUSG00000056366 | Fabp3-ps1     | -0.65 | -0.69 | 11.00 | 10.35 | 11.49 | 10.80 | 13.67 | 0.0011136 | 0.023661 | ZT16, ZT4 |
| ENSMUSG00000038872 | Zfhx3         | 0.68  | 0.24  | 7.14  | 7.82  | 7.23  | 7.48  | 13.66 | 0.0011171 | 0.023695 | ZT4       |
| ENSMUSG00000031381 | Piga          | 0.44  | 0.10  | 10.73 | 11.17 | 11.16 | 11.25 | 13.61 | 0.0011315 | 0.023964 | ZT4       |
| ENSMUSG00000038065 | 2410066E13Rik | -0.36 | -0.42 | 11.14 | 10.78 | 11.27 | 10.85 | 13.60 | 0.0011355 | 0.02401  | ZT16, ZT4 |
| ENSMUSG00000032815 | Fanca         | 0.36  | 0.29  | 8.12  | 8.48  | 8.11  | 8.40  | 13.56 | 0.0011464 | 0.024202 | ZT16, ZT4 |
| ENSMUSG00000039238 | Zfp750        | 0.48  | 0.83  | 8.94  | 9.42  | 8.03  | 8.86  | 13.55 | 0.0011507 | 0.024217 | ZT16      |
| ENSMUSG00000059939 | 9430015G10Rik | 0.49  | 0.15  | 8.30  | 8.80  | 8.26  | 8.41  | 13.55 | 0.0011508 | 0.024217 | ZT4       |
| ENSMUSG00000096847 | Tmem151b      | 0.70  | 0.69  | 6.27  | 6.97  | 5.89  | 6.58  | 13.53 | 0.001158  | 0.024331 | ZT16, ZT4 |
| ENSMUSG00000033068 | Entpd6        | 0.34  | 0.43  | 9.90  | 10.24 | 9.62  | 10.05 | 13.48 | 0.0011749 | 0.02464  | ZT16, ZT4 |
| ENSMUSG00000090164 | BC035044      | -1.24 | -0.62 | 5.50  | 4.26  | 5.93  | 5.31  | 13.47 | 0.0011764 | 0.02464  | ZT4       |
| ENSMUSG00000031548 | Sfrp1         | 0.28  | 0.27  | 12.71 | 12.98 | 12.47 | 12.74 | 13.45 | 0.0011844 | 0.024725 | ZT16, ZT4 |
| ENSMUSG00000033467 | Crlf2         | -0.08 | -0.63 | 7.19  | 7.10  | 7.30  | 6.67  | 13.45 | 0.001185  | 0.024725 | ZT16      |
| ENSMUSG00000023072 | Cep89         | 0.22  | 0.35  | 10.50 | 10.73 | 10.28 | 10.63 | 13.44 | 0.0011861 | 0.024725 | ZT16      |
| ENSMUSG00000041362 | 4930506M07Rik | 0.34  | 0.59  | 10.76 | 11.09 | 10.38 | 10.97 | 13.41 | 0.0011986 | 0.024941 | ZT16      |
| ENSMUSG00000061689 | Dlgap4        | 0.46  | 0.43  | 10.38 | 10.84 | 10.26 | 10.69 | 13.40 | 0.0012002 | 0.024941 | ZT16, ZT4 |
| ENSMUSG00000015112 | Slc25a13      | -0.11 | -0.37 | 13.38 | 13.27 | 13.67 | 13.30 | 13.40 | 0.0012028 | 0.024956 | ZT16      |

|                    |          |       |       |       |       |       |       |       |           |          |           |
|--------------------|----------|-------|-------|-------|-------|-------|-------|-------|-----------|----------|-----------|
| ENSMUSG00000023963 | Cyp39a1  | -0.07 | -0.39 | 9.67  | 9.59  | 9.84  | 9.46  | 13.39 | 0.0012059 | 0.024982 | ZT16      |
| ENSMUSG00000062713 | Sim2     | 0.83  | 0.61  | 8.32  | 9.15  | 8.07  | 8.68  | 13.36 | 0.0012152 | 0.025097 | ZT4       |
| ENSMUSG00000032081 | Apoc3    | 0.57  | 0.64  | 8.54  | 9.12  | 8.58  | 9.22  | 13.36 | 0.0012153 | 0.025097 | ZT16, ZT4 |
| ENSMUSG00000027597 | Ahcy     | -0.46 | -0.49 | 12.14 | 11.69 | 12.43 | 11.94 | 13.32 | 0.001228  | 0.025321 | ZT16, ZT4 |
| ENSMUSG00000031838 | Ifi30    | -0.37 | -0.38 | 11.91 | 11.54 | 12.20 | 11.82 | 13.31 | 0.0012326 | 0.025377 | ZT16, ZT4 |
| ENSMUSG00000026764 | Kif5c    | 0.46  | 0.31  | 7.07  | 7.54  | 7.07  | 7.39  | 13.27 | 0.0012462 | 0.025589 | ZT4       |
| ENSMUSG00000015094 | Npdc1    | 0.42  | 0.34  | 10.42 | 10.84 | 10.20 | 10.54 | 13.27 | 0.0012482 | 0.025589 | ZT16, ZT4 |
| ENSMUSG00000032091 | Tmprss4  | -1.10 | -1.18 | 5.92  | 4.83  | 6.19  | 5.00  | 13.26 | 0.001249  | 0.025589 | ZT16, ZT4 |
| ENSMUSG00000046731 | Kctd11   | -0.13 | -0.70 | 8.50  | 8.37  | 8.88  | 8.17  | 13.26 | 0.0012506 | 0.025589 | ZT16      |
| ENSMUSG00000001166 | Oas1c    | -0.56 | -0.77 | 8.54  | 7.98  | 8.40  | 7.63  | 13.21 | 0.0012692 | 0.025925 | ZT16      |
| ENSMUSG00000024565 | Sall3    | 0.70  | 1.08  | 7.68  | 8.38  | 6.90  | 7.98  | 13.20 | 0.001271  | 0.025925 | ZT16      |
| ENSMUSG00000001270 | Ckb      | 0.29  | 0.61  | 11.82 | 12.11 | 11.71 | 12.32 | 13.20 | 0.0012741 | 0.025949 | ZT16      |
| ENSMUSG00000055415 | Atp10b   | 0.44  | 0.47  | 8.13  | 8.57  | 7.93  | 8.41  | 13.19 | 0.0012762 | 0.025953 | ZT16, ZT4 |
| ENSMUSG00000050395 | Tnfsf15  | -0.79 | -0.11 | 7.30  | 6.51  | 6.29  | 6.18  | 13.18 | 0.0012799 | 0.025988 | ZT4       |
| ENSMUSG00000006154 | Eps8l1   | 0.96  | -0.02 | 8.29  | 9.25  | 8.54  | 8.52  | 13.15 | 0.0012892 | 0.026064 | ZT4       |
| ENSMUSG00000032123 | Dpagt1   | -0.34 | -0.20 | 10.92 | 10.58 | 11.01 | 10.80 | 13.15 | 0.0012905 | 0.026064 | ZT4       |
| ENSMUSG00000024150 | Mcf2     | -0.21 | -0.30 | 13.65 | 13.43 | 13.97 | 13.67 | 13.15 | 0.0012923 | 0.026064 | ZT16      |
| ENSMUSG00000035540 | Gc       | 0.44  | 0.23  | 11.73 | 12.17 | 11.98 | 12.21 | 13.14 | 0.0012938 | 0.026064 | ZT4       |
| ENSMUSG00000057156 | Homez    | 0.33  | 0.44  | 9.97  | 10.31 | 9.61  | 10.05 | 13.14 | 0.0012951 | 0.026064 | ZT16      |
| ENSMUSG00000066278 | Vps37b   | 0.28  | 0.27  | 9.56  | 9.83  | 9.46  | 9.72  | 13.14 | 0.0012955 | 0.026064 | ZT16, ZT4 |
| ENSMUSG00000059970 | Hspa2    | 0.67  | 0.40  | 8.38  | 9.04  | 8.72  | 9.12  | 13.13 | 0.0013    | 0.026098 | ZT4       |
| ENSMUSG00000038522 | Al317395 | -0.26 | -0.37 | 13.58 | 13.32 | 13.83 | 13.47 | 13.12 | 0.0013011 | 0.026098 | ZT16      |
| ENSMUSG00000028018 | Gstdc    | 0.30  | 0.24  | 9.06  | 9.37  | 8.95  | 9.19  | 13.10 | 0.0013108 | 0.026254 | ZT16, ZT4 |
| ENSMUSG00000022779 | Top3b    | 0.21  | 0.39  | 11.89 | 12.09 | 11.72 | 12.11 | 13.09 | 0.0013132 | 0.026262 | ZT16      |
| ENSMUSG00000039878 | Slc39a5  | 0.41  | 0.43  | 11.23 | 11.64 | 11.19 | 11.62 | 13.06 | 0.0013252 | 0.026461 | ZT16, ZT4 |
| ENSMUSG00000050295 | Foxc1    | 0.62  | 0.15  | 8.64  | 9.26  | 8.77  | 8.92  | 13.05 | 0.00133   | 0.026482 | ZT4       |
| ENSMUSG00000025790 | Slco3a1  | -0.37 | -0.39 | 13.17 | 12.80 | 13.32 | 12.93 | 13.05 | 0.0013302 | 0.026482 | ZT16, ZT4 |
| ENSMUSG00000063683 | Glyat    | -0.85 | -0.82 | 15.72 | 14.87 | 16.31 | 15.49 | 13.01 | 0.0013437 | 0.026645 | ZT16, ZT4 |
| ENSMUSG00000046417 | Fam211a  | 0.46  | 0.47  | 7.16  | 7.62  | 6.89  | 7.36  | 13.01 | 0.0013448 | 0.026645 | ZT16, ZT4 |
| ENSMUSG00000094935 | Gm9726   | -0.61 | -0.14 | 7.25  | 6.64  | 6.71  | 6.57  | 13.01 | 0.0013463 | 0.026645 | ZT4       |
| ENSMUSG00000047407 | Tgif1    | 0.45  | 0.11  | 9.46  | 9.91  | 9.22  | 9.33  | 13.01 | 0.0013464 | 0.026645 | ZT4       |
| ENSMUSG00000035852 | Misp     | 0.14  | 0.41  | 9.89  | 10.03 | 10.10 | 10.51 | 12.99 | 0.0013532 | 0.02674  | ZT16      |
| ENSMUSG00000032718 | Mansc1   | 0.34  | 0.47  | 8.44  | 8.78  | 7.87  | 8.34  | 12.96 | 0.0013634 | 0.02687  | ZT16      |
| ENSMUSG00000037868 | Egr2     | 0.36  | -2.69 | 5.15  | 5.51  | 8.22  | 5.54  | 12.96 | 0.0013639 | 0.02687  | ZT16      |

|                     |         |       |       |       |       |       |       |       |           |          |           |
|---------------------|---------|-------|-------|-------|-------|-------|-------|-------|-----------|----------|-----------|
| ENSMUSG00000027189  | Trim44  | 0.29  | 0.35  | 13.03 | 13.32 | 12.78 | 13.13 | 12.96 | 0.001366  | 0.026873 | ZT16, ZT4 |
| ENSMUSG00000021087  | Rtn1    | 0.95  | 0.69  | 6.53  | 7.48  | 6.40  | 7.10  | 12.94 | 0.0013716 | 0.026942 | ZT4       |
| ENSMUSG00000019960  | Dusp6   | -0.12 | -0.65 | 12.38 | 12.26 | 13.06 | 12.40 | 12.94 | 0.0013745 | 0.02696  | ZT16      |
| ENSMUSG00000025869  | Nop16   | -0.28 | -0.43 | 10.41 | 10.13 | 11.05 | 10.62 | 12.93 | 0.0013772 | 0.026973 | ZT16      |
| ENSMUSG00000026156  | B3gat2  | 0.59  | 0.39  | 11.46 | 12.05 | 10.93 | 11.32 | 12.91 | 0.0013847 | 0.027052 | ZT4       |
| ENSMUSG00000032802  | Srxn1   | -0.42 | -0.19 | 12.33 | 11.91 | 12.29 | 12.10 | 12.91 | 0.0013853 | 0.027052 | ZT4       |
| ENSMUSG000000051674 | Dcun1d4 | -0.33 | -0.19 | 12.38 | 12.05 | 12.46 | 12.28 | 12.90 | 0.0013878 | 0.02706  | ZT4       |
| ENSMUSG00000038298  | Pdzk1   | -0.21 | -0.33 | 16.27 | 16.05 | 16.53 | 16.20 | 12.74 | 0.0014571 | 0.028361 | ZT16      |
| ENSMUSG00000071633  | Gm4952  | -1.10 | -0.45 | 9.06  | 7.96  | 9.09  | 8.64  | 12.73 | 0.0014587 | 0.028361 | ZT4       |
| ENSMUSG00000018659  | Pnpo    | -0.35 | -0.36 | 12.68 | 12.33 | 13.15 | 12.79 | 12.73 | 0.0014623 | 0.028389 | ZT16, ZT4 |
| ENSMUSG00000024795  | Kif20b  | -0.99 | -0.59 | 10.62 | 9.64  | 11.45 | 10.86 | 12.71 | 0.0014674 | 0.028412 | ZT4       |
| ENSMUSG00000019564  | Arid3a  | 0.61  | 0.56  | 8.95  | 9.56  | 8.61  | 9.17  | 12.71 | 0.0014678 | 0.028412 | ZT16, ZT4 |
| ENSMUSG00000039063  | Echdc3  | 0.36  | 0.39  | 11.23 | 11.58 | 11.30 | 11.69 | 12.70 | 0.0014727 | 0.028465 | ZT16, ZT4 |
| ENSMUSG00000034918  | Cdhr2   | 0.31  | 0.36  | 11.99 | 12.30 | 12.06 | 12.42 | 12.69 | 0.0014778 | 0.028465 | ZT16, ZT4 |
| ENSMUSG00000038692  | Hoxb4   | 0.54  | 0.48  | 9.73  | 10.26 | 9.57  | 10.05 | 12.69 | 0.0014779 | 0.028465 | ZT16, ZT4 |
| ENSMUSG00000046223  | Plaur   | -0.14 | -0.59 | 8.08  | 7.94  | 7.97  | 7.38  | 12.69 | 0.0014791 | 0.028465 | ZT16      |
| ENSMUSG00000029193  | Cckar   | 0.36  | 0.60  | 12.58 | 12.93 | 12.11 | 12.70 | 12.66 | 0.0014932 | 0.028695 | ZT16      |
| ENSMUSG00000005089  | Slc1a2  | -0.58 | -0.80 | 8.36  | 7.78  | 8.24  | 7.44  | 12.64 | 0.0014992 | 0.028769 | ZT16      |
| ENSMUSG00000054863  | Fam19a5 | 0.46  | 0.65  | 7.86  | 8.32  | 7.32  | 7.97  | 12.63 | 0.0015031 | 0.028803 | ZT16      |
| ENSMUSG00000048485  | Zbtb8b  | 0.65  | 0.50  | 6.67  | 7.32  | 6.49  | 6.99  | 12.62 | 0.0015107 | 0.028906 | ZT4       |
| ENSMUSG00000052512  | Nav2    | 1.15  | 1.47  | 10.64 | 11.79 | 9.63  | 11.10 | 12.61 | 0.0015132 | 0.028907 | ZT16      |
| ENSMUSG00000029330  | Cds1    | 0.34  | 0.38  | 11.27 | 11.62 | 10.99 | 11.37 | 12.61 | 0.0015151 | 0.028907 | ZT16, ZT4 |
| ENSMUSG00000019715  | Gle1    | 0.30  | 0.27  | 11.33 | 11.64 | 11.08 | 11.35 | 12.59 | 0.0015236 | 0.029026 | ZT16, ZT4 |
| ENSMUSG00000029843  | Slc13a4 | -0.37 | -0.57 | 8.66  | 8.29  | 8.99  | 8.41  | 12.57 | 0.0015319 | 0.029143 | ZT16      |
| ENSMUSG00000068086  | Cyp2d9  | -0.63 | -0.43 | 13.60 | 12.96 | 13.87 | 13.44 | 12.54 | 0.0015438 | 0.029327 | ZT4       |
| ENSMUSG00000022139  | Mbnl2   | -0.21 | -0.32 | 12.88 | 12.66 | 13.15 | 12.83 | 12.53 | 0.0015508 | 0.029419 | ZT16      |
| ENSMUSG00000031431  | Tsc22d3 | 0.71  | -0.27 | 11.32 | 12.03 | 12.84 | 12.57 | 12.50 | 0.0015656 | 0.029655 | ZT4       |
| ENSMUSG00000049152  | Ugt3a2  | -0.56 | -0.33 | 17.21 | 16.65 | 17.38 | 17.05 | 12.49 | 0.0015677 | 0.029655 | ZT4       |
| ENSMUSG00000043017  | Ptgir   | -0.14 | -0.63 | 7.63  | 7.49  | 8.04  | 7.41  | 12.48 | 0.0015737 | 0.029727 | ZT16      |
| ENSMUSG00000060126  | Tpt1    | 0.74  | -0.12 | 9.19  | 9.93  | 9.97  | 9.86  | 12.47 | 0.0015804 | 0.029811 | ZT4       |
| ENSMUSG00000056429  | Tgoln1  | -0.35 | -0.16 | 15.25 | 14.91 | 15.32 | 15.16 | 12.46 | 0.0015844 | 0.029844 | ZT4       |
| ENSMUSG00000054939  | Zfp174  | 0.31  | 0.38  | 8.16  | 8.47  | 7.97  | 8.35  | 12.44 | 0.0015947 | 0.029968 | ZT16      |
| ENSMUSG00000038071  | Npy6r   | -1.96 | -2.54 | 5.36  | 3.39  | 5.70  | 3.16  | 12.43 | 0.0015956 | 0.029968 | ZT16      |
| ENSMUSG00000049511  | Htr1b   | 0.58  | 0.42  | 7.28  | 7.85  | 7.12  | 7.55  | 12.42 | 0.0016026 | 0.030018 | ZT4       |

|                    |               |       |       |       |       |       |       |       |           |          |           |
|--------------------|---------------|-------|-------|-------|-------|-------|-------|-------|-----------|----------|-----------|
| ENSMUSG00000064065 | Ipcef1        | 0.28  | 0.41  | 10.17 | 10.44 | 10.11 | 10.52 | 12.42 | 0.0016028 | 0.030018 | ZT16      |
| ENSMUSG00000040312 | Cchcr1        | 0.14  | 0.42  | 8.69  | 8.83  | 7.99  | 8.41  | 12.40 | 0.0016103 | 0.030118 | ZT16      |
| ENSMUSG00000074140 | Zfp319        | 0.63  | 0.20  | 7.24  | 7.87  | 7.14  | 7.35  | 12.39 | 0.0016148 | 0.030129 | ZT4       |
| ENSMUSG00000032827 | Ppp1r9a       | 0.46  | 0.53  | 10.02 | 10.48 | 9.68  | 10.22 | 12.39 | 0.0016154 | 0.030129 | ZT16, ZT4 |
| ENSMUSG00000032254 | Kif23         | 0.53  | 0.61  | 7.79  | 8.32  | 7.39  | 8.00  | 12.38 | 0.0016224 | 0.030198 | ZT16, ZT4 |
| ENSMUSG00000003546 | Klc4          | -0.37 | -0.21 | 12.81 | 12.44 | 12.97 | 12.75 | 12.38 | 0.0016238 | 0.030198 | ZT4       |
| ENSMUSG00000071723 | Gspt2         | 0.81  | 0.18  | 6.82  | 7.63  | 6.67  | 6.85  | 12.37 | 0.001626  | 0.030198 | ZT4       |
| ENSMUSG00000028261 | Ndufaf4       | -0.57 | -0.54 | 12.29 | 11.72 | 13.10 | 12.55 | 12.35 | 0.0016356 | 0.030334 | ZT16, ZT4 |
| ENSMUSG00000035495 | Tstd2         | 0.44  | 0.74  | 11.63 | 12.07 | 11.16 | 11.90 | 12.34 | 0.0016407 | 0.030359 | ZT16      |
| ENSMUSG00000027171 | Prrg4         | -0.64 | -1.25 | 8.22  | 7.58  | 7.83  | 6.59  | 12.34 | 0.0016422 | 0.030359 | ZT16      |
| ENSMUSG00000052727 | Map1b         | 0.45  | 0.42  | 7.92  | 8.37  | 7.75  | 8.17  | 12.34 | 0.0016438 | 0.030359 | ZT16, ZT4 |
| ENSMUSG00000038143 | Stox2         | 0.61  | 0.52  | 8.81  | 9.42  | 8.47  | 8.99  | 12.32 | 0.0016509 | 0.030448 | ZT16, ZT4 |
| ENSMUSG00000029657 | Hsph1         | -0.41 | -0.59 | 13.24 | 12.83 | 14.29 | 13.70 | 12.31 | 0.0016552 | 0.030485 | ZT16      |
| ENSMUSG00000028932 | Psmc2         | -0.42 | -0.26 | 12.91 | 12.49 | 13.06 | 12.80 | 12.30 | 0.0016628 | 0.030582 | ZT4       |
| ENSMUSG00000049307 | Fut4          | 0.18  | 0.53  | 6.63  | 6.81  | 6.15  | 6.68  | 12.28 | 0.0016713 | 0.030696 | ZT16      |
| ENSMUSG00000014077 | Chp1          | -0.26 | -0.22 | 13.49 | 13.23 | 13.67 | 13.45 | 12.26 | 0.0016847 | 0.030899 | ZT16, ZT4 |
| ENSMUSG00000050164 | Mchr1         | -1.30 | -0.86 | 6.45  | 5.15  | 6.96  | 6.10  | 12.24 | 0.0016908 | 0.030937 | ZT4       |
| ENSMUSG00000079262 | Slco1a6       | -0.90 | -0.81 | 14.67 | 13.77 | 15.21 | 14.40 | 12.24 | 0.0016914 | 0.030937 | ZT16, ZT4 |
| ENSMUSG00000036225 | Kctd1         | 0.49  | 0.47  | 9.16  | 9.65  | 9.00  | 9.47  | 12.21 | 0.0017101 | 0.031206 | ZT16, ZT4 |
| ENSMUSG00000054850 | 6330419J24Rik | -0.36 | -0.96 | 8.06  | 7.70  | 7.87  | 6.92  | 12.20 | 0.0017108 | 0.031206 | ZT16      |
| ENSMUSG00000028773 | Fabp3         | -0.74 | -0.69 | 9.55  | 8.81  | 10.05 | 9.36  | 12.17 | 0.0017267 | 0.031453 | ZT16, ZT4 |
| ENSMUSG00000008167 | Fbxw9         | 0.26  | 0.50  | 9.94  | 10.20 | 9.64  | 10.14 | 12.17 | 0.00173   | 0.031469 | ZT16      |
| ENSMUSG00000038893 | Fam117a       | 0.43  | 0.03  | 9.06  | 9.49  | 9.26  | 9.28  | 12.16 | 0.0017334 | 0.031488 | ZT4       |
| ENSMUSG00000045555 | Mettl24       | -0.68 | -0.82 | 6.27  | 5.59  | 6.11  | 5.29  | 12.15 | 0.0017397 | 0.031531 | ZT16      |
| ENSMUSG00000042073 | Abhd14b       | -0.27 | -0.24 | 14.35 | 14.08 | 14.34 | 14.11 | 12.15 | 0.0017405 | 0.031531 | ZT16, ZT4 |
| ENSMUSG00000022982 | Sod1          | -0.24 | -0.39 | 13.61 | 13.37 | 13.74 | 13.34 | 12.10 | 0.0017669 | 0.031965 | ZT16      |
| ENSMUSG00000038541 | Srd5a2        | -1.01 | -1.10 | 8.27  | 7.26  | 8.35  | 7.25  | 12.09 | 0.0017747 | 0.032029 | ZT16, ZT4 |
| ENSMUSG00000031161 | Hdac6         | 0.19  | 0.43  | 12.45 | 12.63 | 12.13 | 12.55 | 12.08 | 0.0017752 | 0.032029 | ZT16      |
| ENSMUSG00000029380 | Cxcl1         | -0.47 | -1.91 | 6.41  | 5.94  | 8.33  | 6.42  | 12.07 | 0.001785  | 0.032113 | ZT16      |
| ENSMUSG00000025082 | Vwa2          | 0.32  | 0.40  | 10.72 | 11.05 | 10.41 | 10.81 | 12.06 | 0.0017869 | 0.032113 | ZT16      |
| ENSMUSG00000038641 | Akr1d1        | -0.60 | -0.43 | 12.07 | 11.46 | 12.29 | 11.86 | 12.06 | 0.0017871 | 0.032113 | ZT4       |
| ENSMUSG00000039364 | Sectm1b       | -0.34 | -0.32 | 12.02 | 11.68 | 11.90 | 11.58 | 12.06 | 0.0017909 | 0.032125 | ZT16, ZT4 |
| ENSMUSG00000000303 | Cdh1          | 0.36  | 0.41  | 13.04 | 13.41 | 12.85 | 13.26 | 12.05 | 0.0017926 | 0.032125 | ZT16, ZT4 |
| ENSMUSG00000057286 | St6galnac2    | -0.40 | -0.12 | 13.24 | 12.84 | 13.28 | 13.16 | 12.05 | 0.001796  | 0.032142 | ZT4       |

|                     |               |       |       |       |       |       |       |       |           |          |           |
|---------------------|---------------|-------|-------|-------|-------|-------|-------|-------|-----------|----------|-----------|
| ENSMUSG00000020720  | Psmid12       | -0.36 | -0.31 | 12.55 | 12.19 | 12.82 | 12.51 | 12.01 | 0.0018145 | 0.032429 | ZT16, ZT4 |
| ENSMUSG00000002797  | Ggct          | 0.62  | 0.90  | 11.95 | 12.57 | 11.77 | 12.67 | 11.97 | 0.0018367 | 0.032781 | ZT16      |
| ENSMUSG00000041058  | Wwp1          | -0.22 | -0.31 | 14.02 | 13.80 | 14.14 | 13.83 | 11.96 | 0.0018437 | 0.032862 | ZT16      |
| ENSMUSG000000036138 | Acaa1a        | -0.16 | -0.32 | 12.61 | 12.45 | 12.62 | 12.30 | 11.94 | 0.0018575 | 0.033063 | ZT16      |
| ENSMUSG000000034593 | Myo5a         | -0.37 | -0.46 | 12.62 | 12.25 | 12.99 | 12.53 | 11.93 | 0.0018612 | 0.033086 | ZT16      |
| ENSMUSG000000026103 | Gls           | 0.34  | 0.38  | 13.81 | 14.16 | 14.00 | 14.38 | 11.92 | 0.0018682 | 0.033165 | ZT16, ZT4 |
| ENSMUSG000000075284 | Wipf1         | 0.60  | 0.36  | 9.20  | 9.80  | 9.23  | 9.60  | 11.91 | 0.001871  | 0.033171 | ZT4       |
| ENSMUSG000000047496 | Rnf152        | 0.50  | 0.42  | 11.46 | 11.96 | 11.08 | 11.50 | 11.91 | 0.001876  | 0.033215 | ZT4       |
| ENSMUSG000000037907 | Ankrd13b      | 0.71  | 0.74  | 9.51  | 10.22 | 8.64  | 9.38  | 11.88 | 0.0018896 | 0.033411 | ZT16, ZT4 |
| ENSMUSG000000031278 | Acsl4         | -0.06 | -0.38 | 12.00 | 11.94 | 12.36 | 11.98 | 11.86 | 0.0019019 | 0.033585 | ZT16      |
| ENSMUSG000000002475 | Abhd3         | -0.46 | -0.34 | 13.31 | 12.85 | 13.55 | 13.21 | 11.84 | 0.0019121 | 0.033719 | ZT4       |
| ENSMUSG000000007950 | Abhd8         | 0.59  | 0.23  | 8.59  | 9.18  | 8.65  | 8.88  | 11.80 | 0.0019392 | 0.034152 | ZT4       |
| ENSMUSG000000062729 | Ppox          | 0.23  | 0.31  | 11.28 | 11.51 | 11.10 | 11.41 | 11.79 | 0.0019468 | 0.034241 | ZT16      |
| ENSMUSG000000024803 | Ankrd1        | -0.51 | -0.72 | 6.76  | 6.25  | 7.20  | 6.48  | 11.78 | 0.0019502 | 0.034255 | ZT16      |
| ENSMUSG000000047586 | Nccrp1        | 0.83  | 0.38  | 10.13 | 10.96 | 10.25 | 10.63 | 11.78 | 0.0019537 | 0.034271 | ZT4       |
| ENSMUSG000000030963 | Umod          | -0.55 | -0.38 | 18.22 | 17.66 | 18.63 | 18.24 | 11.75 | 0.0019674 | 0.034446 | ZT4       |
| ENSMUSG000000043252 | Tmem64        | 0.13  | 0.42  | 13.67 | 13.80 | 13.61 | 14.03 | 11.75 | 0.0019689 | 0.034446 | ZT16      |
| ENSMUSG000000033767 | D930015E06Rik | -0.20 | -0.51 | 9.06  | 8.86  | 8.96  | 8.44  | 11.75 | 0.0019715 | 0.034446 | ZT16      |
| ENSMUSG000000095105 | Edaradd       | 0.25  | 0.84  | 6.79  | 7.04  | 6.27  | 7.11  | 11.73 | 0.0019822 | 0.034531 | ZT16      |
| ENSMUSG000000097061 | 9330151L19Rik | 0.33  | 0.39  | 8.92  | 9.25  | 8.70  | 9.09  | 11.73 | 0.0019836 | 0.034531 | ZT16      |
| ENSMUSG000000037669 | 1110057K04Rik | -0.32 | -0.23 | 11.59 | 11.27 | 11.84 | 11.62 | 11.73 | 0.0019841 | 0.034531 | ZT4       |
| ENSMUSG000000024866 | Acy3          | -0.54 | -0.35 | 17.30 | 16.76 | 17.35 | 16.99 | 11.72 | 0.0019867 | 0.034531 | ZT4       |
| ENSMUSG000000038704 | Aspdh         | -0.43 | -0.23 | 12.59 | 12.16 | 12.43 | 12.20 | 11.71 | 0.0019921 | 0.03458  | ZT4       |
| ENSMUSG000000007908 | Hmgcl1        | -0.48 | -0.20 | 7.31  | 6.83  | 7.35  | 7.15  | 11.70 | 0.001998  | 0.034594 | ZT4       |
| ENSMUSG000000002769 | Gnmt          | -0.25 | -0.40 | 10.34 | 10.09 | 10.46 | 10.06 | 11.70 | 0.0020004 | 0.034594 | ZT16      |
| ENSMUSG000000029821 | Dfna5         | -0.37 | -0.32 | 9.32  | 8.95  | 9.31  | 8.98  | 11.70 | 0.0020007 | 0.034594 | ZT16, ZT4 |
| ENSMUSG000000002944 | Cd36          | -0.82 | -0.66 | 15.86 | 15.04 | 16.22 | 15.56 | 11.69 | 0.0020048 | 0.034619 | ZT4       |
| ENSMUSG000000075256 | Cerkl         | 0.94  | 1.47  | 5.59  | 6.53  | 4.73  | 6.19  | 11.69 | 0.0020084 | 0.034635 | ZT16      |
| ENSMUSG000000048772 | Tmem53        | 0.22  | 0.49  | 10.11 | 10.32 | 9.84  | 10.33 | 11.62 | 0.002054  | 0.035376 | ZT16      |
| ENSMUSG000000035640 | Dos           | 0.59  | 0.32  | 7.40  | 7.99  | 7.27  | 7.59  | 11.58 | 0.002078  | 0.035743 | ZT4       |
| ENSMUSG000000024663 | Rab3il1       | -0.40 | 0.03  | 11.49 | 11.09 | 11.46 | 11.50 | 11.56 | 0.0020915 | 0.035928 | ZT4       |
| ENSMUSG000000032850 | Rnft2         | 0.81  | 0.98  | 7.11  | 7.92  | 6.03  | 7.01  | 11.53 | 0.002114  | 0.036269 | ZT16      |
| ENSMUSG000000018909 | Arrb1         | 0.48  | 0.59  | 12.21 | 12.69 | 11.84 | 12.43 | 11.51 | 0.0021227 | 0.03637  | ZT16      |
| ENSMUSG000000090165 | Ugt1a10       | 2.59  | 1.40  | 7.14  | 9.73  | 8.54  | 9.94  | 11.50 | 0.0021306 | 0.036459 | ZT4       |



|                    |               |       |       |       |       |       |       |       |           |          |           |
|--------------------|---------------|-------|-------|-------|-------|-------|-------|-------|-----------|----------|-----------|
| ENSMUSG00000042097 | Zfp239        | 0.33  | 0.55  | 8.33  | 8.66  | 8.21  | 8.76  | 11.49 | 0.0021372 | 0.036524 | ZT16      |
| ENSMUSG00000030298 | Sec13         | -0.29 | -0.33 | 12.52 | 12.22 | 12.92 | 12.58 | 11.48 | 0.0021439 | 0.036592 | ZT16, ZT4 |
| ENSMUSG00000022353 | Mtss1         | -0.15 | -0.43 | 12.27 | 12.11 | 12.30 | 11.87 | 11.44 | 0.0021705 | 0.037    | ZT16      |
| ENSMUSG00000028024 | Enpep         | -0.30 | -0.35 | 13.82 | 13.51 | 14.05 | 13.70 | 11.43 | 0.0021812 | 0.037133 | ZT16      |
| ENSMUSG00000026728 | Vim           | -0.33 | -0.22 | 11.65 | 11.32 | 11.75 | 11.54 | 11.41 | 0.0021954 | 0.037328 | ZT4       |
| ENSMUSG00000011179 | Odc1          | -0.71 | -0.70 | 14.47 | 13.76 | 14.87 | 14.17 | 11.40 | 0.002201  | 0.037374 | ZT16, ZT4 |
| ENSMUSG00000022437 | Samm50        | -0.26 | -0.25 | 13.32 | 13.06 | 13.52 | 13.27 | 11.39 | 0.0022048 | 0.037391 | ZT16, ZT4 |
| ENSMUSG00000026971 | Itgb6         | 0.00  | 0.68  | 13.48 | 13.48 | 12.92 | 13.60 | 11.39 | 0.0022113 | 0.037454 | ZT16      |
| ENSMUSG00000058006 | Mdn1          | -0.37 | -0.12 | 10.94 | 10.56 | 11.01 | 10.89 | 11.35 | 0.0022396 | 0.037885 | ZT4       |
| ENSMUSG00000031029 | Eif3f         | 0.53  | 0.12  | 11.16 | 11.69 | 11.09 | 11.21 | 11.34 | 0.0022472 | 0.037966 | ZT4       |
| ENSMUSG00000039865 | Slc44a3       | 0.30  | 0.42  | 9.63  | 9.92  | 9.56  | 9.97  | 11.31 | 0.0022684 | 0.038226 | ZT16      |
| ENSMUSG00000021094 | Dhrs7         | -0.21 | -0.47 | 9.57  | 9.36  | 9.87  | 9.40  | 11.31 | 0.0022684 | 0.038226 | ZT16      |
| ENSMUSG00000022415 | Syngn1        | 0.25  | 0.26  | 10.05 | 10.30 | 9.87  | 10.13 | 11.30 | 0.0022737 | 0.038267 | ZT16, ZT4 |
| ENSMUSG00000026656 | Fcgr2b        | -0.04 | 0.37  | 11.73 | 11.69 | 11.22 | 11.59 | 11.29 | 0.0022828 | 0.038351 | ZT16      |
| ENSMUSG00000037263 | 1700055N04Rik | -0.73 | -0.67 | 7.25  | 6.53  | 7.21  | 6.54  | 11.28 | 0.0022845 | 0.038351 | ZT16, ZT4 |
| ENSMUSG00000031024 | St5           | 0.37  | 0.41  | 11.21 | 11.58 | 10.88 | 11.29 | 11.24 | 0.0023149 | 0.038812 | ZT16, ZT4 |
| ENSMUSG00000019894 | Slc6a15       | -0.36 | -0.52 | 11.67 | 11.31 | 11.96 | 11.44 | 11.24 | 0.002321  | 0.038867 | ZT16      |
| ENSMUSG00000020572 | Nampt         | -0.48 | -0.84 | 13.72 | 13.24 | 14.63 | 13.79 | 11.22 | 0.0023288 | 0.038947 | ZT16      |
| ENSMUSG00000029664 | Tfpi2         | 0.23  | 0.75  | 10.89 | 11.12 | 10.93 | 11.68 | 11.22 | 0.0023361 | 0.038996 | ZT16      |
| ENSMUSG00000073125 | Xlr3b         | -0.24 | 2.57  | 6.43  | 6.18  | 5.63  | 8.21  | 11.21 | 0.0023376 | 0.038996 | ZT16      |
| ENSMUSG00000095300 | Gm906         | -1.17 | -0.99 | 6.61  | 5.44  | 7.23  | 6.25  | 11.20 | 0.0023456 | 0.039034 | ZT4       |
| ENSMUSG00000022636 | Alcam         | 0.26  | 0.37  | 11.48 | 11.74 | 11.53 | 11.90 | 11.20 | 0.0023457 | 0.039034 | ZT16      |
| ENSMUSG00000035829 | Ppp1r26       | 0.49  | 0.37  | 8.01  | 8.50  | 7.52  | 7.88  | 11.20 | 0.0023493 | 0.039044 | ZT4       |
| ENSMUSG00000008035 | Mid1ip1       | -0.17 | -0.46 | 11.33 | 11.16 | 11.79 | 11.33 | 11.19 | 0.0023571 | 0.039124 | ZT16      |
| ENSMUSG00000026875 | Traf1         | -0.46 | -0.54 | 7.17  | 6.72  | 7.04  | 6.50  | 11.17 | 0.0023714 | 0.03928  | ZT16      |
| ENSMUSG00000040447 | Spns2         | 0.14  | 0.34  | 11.07 | 11.21 | 11.29 | 11.63 | 11.17 | 0.0023724 | 0.03928  | ZT16      |
| ENSMUSG00000024014 | Pim1          | 0.58  | 0.18  | 7.72  | 8.30  | 7.51  | 7.69  | 11.12 | 0.0024109 | 0.039854 | ZT4       |
| ENSMUSG00000030894 | Tpp1          | -0.31 | -0.16 | 14.57 | 14.26 | 14.60 | 14.44 | 11.12 | 0.002413  | 0.039854 | ZT4       |
| ENSMUSG00000096199 | Ptrhd1        | -0.36 | -0.31 | 12.72 | 12.35 | 12.85 | 12.54 | 11.10 | 0.0024221 | 0.039953 | ZT4       |
| ENSMUSG00000025925 | Terf1         | 0.46  | 0.45  | 9.51  | 9.97  | 9.66  | 10.11 | 11.10 | 0.002429  | 0.039973 | ZT16, ZT4 |
| ENSMUSG00000029432 | Gbas          | 0.36  | 0.16  | 12.21 | 12.57 | 12.03 | 12.20 | 11.09 | 0.0024301 | 0.039973 | ZT4       |
| ENSMUSG00000047638 | Nr1h4         | -0.53 | -0.51 | 13.43 | 12.90 | 13.73 | 13.22 | 11.09 | 0.0024323 | 0.039973 | ZT16, ZT4 |
| ENSMUSG00000024098 | Twsg1         | 0.27  | 0.27  | 12.49 | 12.76 | 12.51 | 12.78 | 11.07 | 0.0024493 | 0.040203 | ZT16, ZT4 |
| ENSMUSG00000043300 | B3galnt1      | 0.42  | 0.32  | 10.05 | 10.47 | 10.00 | 10.32 | 11.06 | 0.002455  | 0.040216 | ZT4       |

|                    |               |       |       |       |       |       |       |       |           |          |           |
|--------------------|---------------|-------|-------|-------|-------|-------|-------|-------|-----------|----------|-----------|
| ENSMUSG00000041028 | Ghitm         | -0.39 | -0.32 | 15.77 | 15.38 | 15.98 | 15.66 | 11.06 | 0.0024573 | 0.040216 | ZT4       |
| ENSMUSG00000022325 | Pop1          | -0.38 | -0.30 | 10.60 | 10.23 | 10.53 | 10.22 | 11.06 | 0.0024592 | 0.040216 | ZT4       |
| ENSMUSG00000042406 | Atf4          | -0.16 | -0.42 | 12.62 | 12.46 | 13.26 | 12.84 | 11.03 | 0.0024786 | 0.040484 | ZT16      |
| ENSMUSG00000020086 | H2afy2        | 0.28  | 0.50  | 8.69  | 8.97  | 8.16  | 8.67  | 11.02 | 0.0024876 | 0.040489 | ZT16      |
| ENSMUSG00000030022 | Adamts9       | 0.13  | 0.36  | 10.14 | 10.27 | 10.08 | 10.44 | 11.02 | 0.0024889 | 0.040489 | ZT16      |
| ENSMUSG00000061028 | Clasrp        | 0.69  | 0.17  | 8.72  | 9.40  | 8.80  | 8.97  | 11.02 | 0.0024905 | 0.040489 | ZT4       |
| ENSMUSG00000042453 | Reln          | -0.59 | -0.36 | 8.46  | 7.88  | 8.22  | 7.86  | 11.02 | 0.0024911 | 0.040489 | ZT4       |
| ENSMUSG00000055015 | Gm9961        | 3.63  | 3.09  | 1.13  | 4.75  | 2.48  | 5.56  | 11.00 | 0.0025095 | 0.040726 | ZT4       |
| ENSMUSG00000020743 | Mif4gd        | 0.37  | 0.31  | 11.15 | 11.52 | 10.95 | 11.26 | 10.99 | 0.0025118 | 0.040726 | ZT4       |
| ENSMUSG00000029098 | Acox3         | -0.25 | -0.32 | 14.40 | 14.16 | 14.58 | 14.25 | 10.99 | 0.0025156 | 0.040729 | ZT16      |
| ENSMUSG00000025231 | Sufu          | 0.39  | 0.46  | 11.61 | 12.01 | 11.16 | 11.62 | 10.99 | 0.0025182 | 0.040729 | ZT16      |
| ENSMUSG00000060131 | Atp8b4        | -0.90 | -0.67 | 8.04  | 7.14  | 7.52  | 6.84  | 10.98 | 0.0025241 | 0.040775 | ZT4       |
| ENSMUSG00000072964 | Bhlhb9        | 0.43  | 0.24  | 9.36  | 9.79  | 9.40  | 9.64  | 10.97 | 0.002531  | 0.040837 | ZT4       |
| ENSMUSG00000049723 | Mmp12         | -0.75 | -0.30 | 8.22  | 7.47  | 7.47  | 7.17  | 10.96 | 0.0025399 | 0.040931 | ZT4       |
| ENSMUSG00000049502 | Dtx3l         | 0.22  | 0.50  | 10.31 | 10.53 | 9.96  | 10.46 | 10.93 | 0.0025674 | 0.041324 | ZT16      |
| ENSMUSG00000028937 | Acot7         | -0.24 | -0.34 | 9.46  | 9.23  | 9.73  | 9.38  | 10.91 | 0.0025786 | 0.041455 | ZT16      |
| ENSMUSG00000075044 | Slc22a29      | 0.67  | 0.64  | 8.86  | 9.53  | 8.90  | 9.54  | 10.87 | 0.0026134 | 0.041963 | ZT16, ZT4 |
| ENSMUSG00000020265 | Sumo3         | 0.20  | 0.36  | 12.60 | 12.81 | 12.24 | 12.60 | 10.86 | 0.0026259 | 0.042075 | ZT16      |
| ENSMUSG00000063268 | Parp10        | -0.57 | -0.30 | 11.13 | 10.57 | 10.56 | 10.26 | 10.86 | 0.0026275 | 0.042075 | ZT4       |
| ENSMUSG00000051495 | Irf2bp2       | 0.47  | 0.13  | 11.40 | 11.86 | 11.46 | 11.60 | 10.85 | 0.0026299 | 0.042075 | ZT4       |
| ENSMUSG00000048376 | F2r           | -0.19 | -0.37 | 11.97 | 11.78 | 11.82 | 11.45 | 10.84 | 0.0026452 | 0.042182 | ZT16      |
| ENSMUSG00000042436 | Mfap4         | -0.82 | -0.37 | 7.46  | 6.64  | 6.89  | 6.52  | 10.84 | 0.002646  | 0.042182 | ZT4       |
| ENSMUSG00000024041 | Cryaa         | -1.01 | -1.07 | 6.21  | 5.20  | 6.79  | 5.72  | 10.84 | 0.0026461 | 0.042182 | ZT16, ZT4 |
| ENSMUSG00000026638 | Irf6          | 0.20  | 0.47  | 12.69 | 12.88 | 12.36 | 12.83 | 10.82 | 0.002657  | 0.042305 | ZT16      |
| ENSMUSG00000037989 | Wnk2          | 0.90  | 0.80  | 6.48  | 7.39  | 5.77  | 6.57  | 10.80 | 0.0026805 | 0.042627 | ZT4       |
| ENSMUSG00000006818 | Sod2          | -0.14 | -0.29 | 14.25 | 14.11 | 14.48 | 14.18 | 10.79 | 0.0026837 | 0.042628 | ZT16      |
| ENSMUSG00000021559 | Dapk1         | 0.78  | 0.67  | 11.37 | 12.15 | 10.91 | 11.57 | 10.79 | 0.0026883 | 0.04265  | ZT4       |
| ENSMUSG00000042498 | D330045A20Rik | 0.80  | 0.75  | 7.45  | 8.24  | 8.00  | 8.75  | 10.78 | 0.002695  | 0.042705 | ZT16, ZT4 |
| ENSMUSG00000040003 | Magi2         | 0.66  | 0.29  | 8.86  | 9.52  | 8.80  | 9.09  | 10.77 | 0.002702  | 0.042765 | ZT4       |
| ENSMUSG00000030849 | Fgfr2         | 0.33  | 0.34  | 10.07 | 10.40 | 9.82  | 10.15 | 10.77 | 0.0027071 | 0.042783 | ZT16, ZT4 |
| ENSMUSG00000027894 | Slc6a17       | 0.69  | 0.80  | 9.80  | 10.49 | 9.25  | 10.04 | 10.76 | 0.0027096 | 0.042783 | ZT16      |
| ENSMUSG00000020882 | Cacnb1        | 0.46  | 0.53  | 7.06  | 7.53  | 6.54  | 7.07  | 10.76 | 0.0027132 | 0.042789 | ZT16      |
| ENSMUSG00000031004 | Mki67         | -0.64 | 0.22  | 8.63  | 7.98  | 8.08  | 8.29  | 10.74 | 0.0027314 | 0.043025 | ZT4       |
| ENSMUSG00000022055 | Nefl          | -1.20 | -1.33 | 5.92  | 4.72  | 5.91  | 4.58  | 10.73 | 0.0027447 | 0.043145 | ZT16      |

|                    |               |       |       |       |       |       |       |       |           |          |           |
|--------------------|---------------|-------|-------|-------|-------|-------|-------|-------|-----------|----------|-----------|
| ENSMUSG00000036053 | Fmnl2         | 0.33  | 0.33  | 10.14 | 10.48 | 10.24 | 10.56 | 10.72 | 0.0027455 | 0.043145 | ZT16, ZT4 |
| ENSMUSG00000029082 | Bst1          | 0.35  | 0.32  | 9.26  | 9.61  | 9.21  | 9.53  | 10.71 | 0.0027571 | 0.043276 | ZT4       |
| ENSMUSG00000026603 | Smyd2         | -0.42 | -0.51 | 10.43 | 10.02 | 10.70 | 10.19 | 10.69 | 0.0027732 | 0.043417 | ZT16      |
| ENSMUSG00000028132 | Tmem56        | -0.46 | -0.33 | 11.60 | 11.14 | 11.62 | 11.28 | 10.69 | 0.0027778 | 0.043417 | ZT4       |
| ENSMUSG00000071855 | Ccdc112       | 0.57  | 0.38  | 7.55  | 8.12  | 7.53  | 7.90  | 10.69 | 0.0027785 | 0.043417 | ZT4       |
| ENSMUSG00000023243 | Kcnk5         | -0.37 | -0.69 | 13.19 | 12.82 | 13.66 | 12.97 | 10.69 | 0.0027792 | 0.043417 | ZT16      |
| ENSMUSG00000062397 | Zfp706        | -0.12 | -0.42 | 13.69 | 13.57 | 13.96 | 13.54 | 10.67 | 0.002797  | 0.043644 | ZT16      |
| ENSMUSG00000036368 | Rmdn2         | 0.19  | 0.48  | 8.37  | 8.56  | 8.31  | 8.78  | 10.66 | 0.0028087 | 0.043776 | ZT16      |
| ENSMUSG00000038497 | Tmco3         | -0.41 | -0.17 | 12.96 | 12.55 | 12.73 | 12.55 | 10.65 | 0.0028162 | 0.04384  | ZT4       |
| ENSMUSG00000040105 | Ppapdc2       | 0.40  | 0.27  | 10.89 | 11.29 | 10.73 | 11.00 | 10.62 | 0.0028432 | 0.04421  | ZT4       |
| ENSMUSG00000030246 | Ldhb          | -0.40 | -0.39 | 15.86 | 15.46 | 16.15 | 15.76 | 10.60 | 0.0028583 | 0.044392 | ZT16, ZT4 |
| ENSMUSG00000038600 | Atp6v0a4      | 0.26  | 0.37  | 13.93 | 14.20 | 13.65 | 14.02 | 10.59 | 0.0028715 | 0.044545 | ZT16      |
| ENSMUSG00000018846 | Pank3         | -0.24 | -0.36 | 13.04 | 12.80 | 13.09 | 12.73 | 10.59 | 0.0028765 | 0.044571 | ZT16      |
| ENSMUSG00000042622 | Maff          | 0.21  | -1.20 | 6.92  | 7.13  | 7.85  | 6.64  | 10.57 | 0.0028921 | 0.044676 | ZT16      |
| ENSMUSG00000052364 | B630019K06Rik | 0.53  | 0.43  | 6.80  | 7.32  | 6.79  | 7.22  | 10.57 | 0.0028921 | 0.044676 | ZT4       |
| ENSMUSG00000038279 | Nop2          | -0.35 | -0.15 | 11.00 | 10.65 | 11.38 | 11.23 | 10.57 | 0.0028934 | 0.044676 | ZT4       |
| ENSMUSG00000090150 | Acad11        | -0.49 | -0.41 | 14.63 | 14.14 | 15.07 | 14.66 | 10.56 | 0.0029042 | 0.044787 | ZT4       |
| ENSMUSG00000004356 | Utp20         | -0.39 | -0.14 | 11.70 | 11.31 | 11.68 | 11.53 | 10.55 | 0.0029074 | 0.044787 | ZT4       |
| ENSMUSG00000062542 | Syt9          | 0.36  | 0.68  | 6.60  | 6.96  | 6.51  | 7.19  | 10.53 | 0.0029271 | 0.045014 | ZT16      |
| ENSMUSG00000004233 | Wars2         | 0.07  | 0.40  | 9.91  | 9.98  | 9.54  | 9.93  | 10.53 | 0.0029288 | 0.045014 | ZT16      |
| ENSMUSG00000095930 | Nim1          | -0.56 | -0.29 | 8.71  | 8.16  | 8.25  | 7.96  | 10.52 | 0.0029363 | 0.045077 | ZT4       |
| ENSMUSG00000036989 | Trim3         | 0.29  | 0.36  | 10.60 | 10.89 | 10.28 | 10.65 | 10.52 | 0.0029446 | 0.045152 | ZT16      |
| ENSMUSG00000030089 | Slc41a3       | 0.63  | 0.84  | 7.88  | 8.51  | 7.29  | 8.12  | 10.50 | 0.0029597 | 0.045299 | ZT16      |
| ENSMUSG00000022123 | Scel          | 0.26  | 0.24  | 9.62  | 9.87  | 9.64  | 9.88  | 10.50 | 0.0029611 | 0.045299 | ZT4       |
| ENSMUSG00000060600 | Eno3          | 0.43  | 0.13  | 8.02  | 8.45  | 8.18  | 8.31  | 10.49 | 0.0029687 | 0.045346 | ZT4       |
| ENSMUSG00000031283 | Chrdl1        | 0.07  | 0.63  | 9.95  | 10.02 | 9.60  | 10.23 | 10.49 | 0.0029729 | 0.045346 | ZT16      |
| ENSMUSG00000029363 | Rfc5          | 0.27  | 0.29  | 8.77  | 9.04  | 8.34  | 8.63  | 10.48 | 0.0029772 | 0.045346 | ZT16      |
| ENSMUSG00000038576 | Susd4         | -0.32 | -0.34 | 8.86  | 8.54  | 8.85  | 8.51  | 10.48 | 0.0029778 | 0.045346 | ZT16      |
| ENSMUSG00000029135 | Fosl2         | 0.16  | -0.57 | 9.69  | 9.85  | 9.75  | 9.17  | 10.47 | 0.002992  | 0.045511 | ZT16      |
| ENSMUSG00000066058 | Cldn19        | 0.35  | 0.48  | 11.00 | 11.35 | 10.80 | 11.28 | 10.46 | 0.0030041 | 0.045524 | ZT16      |
| ENSMUSG00000022229 | Atp12a        | 0.76  | 3.68  | 5.17  | 5.93  | 1.24  | 4.92  | 10.46 | 0.0030045 | 0.045524 | ZT16      |
| ENSMUSG00000024782 | Ak3           | -0.21 | -0.25 | 14.71 | 14.50 | 14.74 | 14.49 | 10.46 | 0.0030052 | 0.045524 | ZT16      |
| ENSMUSG00000024694 | Keg1          | -0.65 | -0.53 | 17.56 | 16.91 | 18.10 | 17.57 | 10.45 | 0.0030066 | 0.045524 | ZT4       |
| ENSMUSG00000005251 | Ripk4         | -0.14 | -0.36 | 10.44 | 10.30 | 10.76 | 10.39 | 10.44 | 0.0030217 | 0.0457   | ZT16      |

|                    |         |       |       |       |       |       |       |       |           |          |           |
|--------------------|---------|-------|-------|-------|-------|-------|-------|-------|-----------|----------|-----------|
| ENSMUSG00000034584 | Exph5   | 0.42  | 0.82  | 9.16  | 9.58  | 8.86  | 9.68  | 10.42 | 0.0030406 | 0.045894 | ZT16      |
| ENSMUSG00000026343 | Gpr39   | 0.30  | 0.40  | 7.76  | 8.06  | 8.02  | 8.42  | 10.42 | 0.0030414 | 0.045894 | ZT16      |
| ENSMUSG00000025130 | P4hb    | -0.35 | -0.25 | 16.07 | 15.72 | 16.28 | 16.03 | 10.41 | 0.0030556 | 0.046008 | ZT4       |
| ENSMUSG00000001473 | Tubb6   | -0.83 | -0.45 | 8.82  | 8.00  | 8.94  | 8.49  | 10.41 | 0.0030576 | 0.046008 | ZT4       |
| ENSMUSG00000028940 | Hes2    | -0.90 | -0.54 | 5.85  | 4.95  | 5.42  | 4.88  | 10.40 | 0.0030594 | 0.046008 | ZT4       |
| ENSMUSG00000029192 | Tbc1d14 | 0.14  | 0.36  | 12.65 | 12.79 | 12.54 | 12.90 | 10.39 | 0.0030729 | 0.046127 | ZT16      |
| ENSMUSG00000026692 | Fmo4    | 0.29  | 0.39  | 11.18 | 11.48 | 10.72 | 11.10 | 10.39 | 0.0030766 | 0.046127 | ZT16      |
| ENSMUSG00000031910 | Has3    | 0.51  | 0.38  | 5.57  | 6.08  | 5.30  | 5.68  | 10.39 | 0.0030777 | 0.046127 | ZT4       |
| ENSMUSG00000022550 | Adck5   | 0.35  | 0.42  | 10.77 | 11.12 | 10.56 | 10.98 | 10.37 | 0.0030977 | 0.046374 | ZT16      |
| ENSMUSG00000032540 | Abhd5   | -0.33 | -0.34 | 12.07 | 11.74 | 12.22 | 11.88 | 10.35 | 0.0031157 | 0.046509 | ZT16      |
| ENSMUSG00000036712 | Cyld    | -0.24 | -0.29 | 12.24 | 12.00 | 12.23 | 11.94 | 10.35 | 0.0031186 | 0.046509 | ZT16      |
| ENSMUSG00000022286 | Grhl2   | 0.35  | 0.33  | 8.78  | 9.13  | 8.68  | 9.01  | 10.35 | 0.0031207 | 0.046509 | ZT4       |
| ENSMUSG00000038700 | Hoxb5   | 0.74  | 0.75  | 8.11  | 8.85  | 7.52  | 8.27  | 10.34 | 0.0031239 | 0.046509 | ZT16, ZT4 |
| ENSMUSG00000054708 | Ankrd24 | 0.51  | 0.33  | 9.80  | 10.31 | 9.53  | 9.86  | 10.34 | 0.0031257 | 0.046509 | ZT4       |
| ENSMUSG00000044231 | Nhlrc1  | 0.36  | 0.73  | 7.21  | 7.56  | 6.52  | 7.25  | 10.34 | 0.0031302 | 0.046509 | ZT16      |
| ENSMUSG00000005483 | Dnajb1  | -0.21 | -0.57 | 11.03 | 10.82 | 12.24 | 11.68 | 10.34 | 0.0031312 | 0.046509 | ZT16      |
| ENSMUSG00000054422 | Fabp1   | -1.49 | -0.74 | 5.81  | 4.32  | 7.12  | 6.38  | 10.32 | 0.003144  | 0.046577 | ZT4       |
| ENSMUSG00000000049 | Apoh    | 0.80  | 0.77  | 10.15 | 10.96 | 10.38 | 11.15 | 10.32 | 0.003153  | 0.046577 | ZT4       |
| ENSMUSG00000024857 | Cabp2   | 0.66  | 1.26  | 4.84  | 5.51  | 4.58  | 5.84  | 10.31 | 0.0031558 | 0.046577 | ZT16      |
| ENSMUSG00000044647 | Csrnp3  | 0.04  | 0.75  | 8.30  | 8.34  | 7.62  | 8.37  | 10.31 | 0.0031566 | 0.046577 | ZT16      |
| ENSMUSG00000024747 | Aldh1a7 | -0.67 | -0.53 | 10.08 | 9.41  | 10.69 | 10.16 | 10.31 | 0.0031584 | 0.046577 | ZT4       |
| ENSMUSG00000018821 | Avpi1   | -0.29 | -0.30 | 9.24  | 8.95  | 9.35  | 9.05  | 10.31 | 0.0031602 | 0.046577 | ZT16      |
| ENSMUSG00000090698 | Apold1  | 0.12  | -0.99 | 7.32  | 7.45  | 7.81  | 6.81  | 10.31 | 0.0031603 | 0.046577 | ZT16      |
| ENSMUSG00000044864 | Ankrd50 | 0.30  | 0.39  | 10.45 | 10.75 | 9.82  | 10.21 | 10.30 | 0.0031677 | 0.046633 | ZT16      |
| ENSMUSG00000003477 | Inmt    | -0.97 | -1.23 | 16.20 | 15.23 | 17.01 | 15.78 | 10.30 | 0.0031744 | 0.046681 | ZT16      |
| ENSMUSG00000029238 | Clock   | 0.11  | 0.40  | 12.19 | 12.30 | 12.37 | 12.77 | 10.29 | 0.0031785 | 0.046686 | ZT16      |
| ENSMUSG00000019433 | Gipc1   | 0.22  | 0.26  | 11.02 | 11.23 | 10.89 | 11.15 | 10.29 | 0.0031824 | 0.046686 | ZT16      |
| ENSMUSG00000039304 | Tnfsf10 | -0.55 | -0.44 | 12.20 | 11.65 | 12.12 | 11.69 | 10.29 | 0.0031853 | 0.046686 | ZT4       |
| ENSMUSG00000038633 | Degs1   | -0.34 | -0.23 | 14.24 | 13.90 | 14.36 | 14.13 | 10.26 | 0.0032135 | 0.047047 | ZT4       |
| ENSMUSG00000003518 | Dusp3   | -0.39 | -0.23 | 12.44 | 12.05 | 12.52 | 12.29 | 10.25 | 0.0032256 | 0.047162 | ZT4       |
| ENSMUSG00000026566 | Mpzl1   | 0.28  | 0.29  | 10.54 | 10.82 | 10.14 | 10.42 | 10.25 | 0.0032284 | 0.047162 | ZT16      |
| ENSMUSG00000028378 | Ptgr1   | -0.42 | -0.89 | 10.29 | 9.87  | 10.85 | 9.96  | 10.24 | 0.0032341 | 0.047194 | ZT16      |
| ENSMUSG00000002083 | Bbc3    | 0.97  | 0.37  | 5.63  | 6.60  | 5.03  | 5.40  | 10.24 | 0.0032408 | 0.047239 | ZT4       |
| ENSMUSG00000027478 | Dnmt3b  | 0.95  | 0.42  | 6.75  | 7.70  | 6.53  | 6.95  | 10.22 | 0.0032547 | 0.047389 | ZT4       |

|                    |               |       |       |       |       |       |       |       |           |          |      |
|--------------------|---------------|-------|-------|-------|-------|-------|-------|-------|-----------|----------|------|
| ENSMUSG00000038260 | Trpm4         | 0.55  | 0.36  | 8.56  | 9.11  | 8.13  | 8.50  | 10.22 | 0.0032611 | 0.047389 | ZT4  |
| ENSMUSG00000073295 | Nudt11        | 0.63  | 0.34  | 6.95  | 7.58  | 6.90  | 7.25  | 10.22 | 0.0032618 | 0.047389 | ZT4  |
| ENSMUSG00000028977 | Cas21         | 0.87  | 0.46  | 8.83  | 9.70  | 8.58  | 9.05  | 10.21 | 0.0032658 | 0.047395 | ZT4  |
| ENSMUSG00000071178 | Serpina1b     | -1.17 | -1.01 | 8.79  | 7.62  | 9.15  | 8.14  | 10.20 | 0.0032793 | 0.047539 | ZT4  |
| ENSMUSG00000048905 | 4930539E08Rik | 0.28  | 1.20  | 6.74  | 7.02  | 4.65  | 5.85  | 10.20 | 0.0032837 | 0.04755  | ZT16 |
| ENSMUSG00000031090 | Nadsyn1       | -0.28 | -0.23 | 11.16 | 10.88 | 11.32 | 11.08 | 10.18 | 0.0032978 | 0.047703 | ZT4  |
| ENSMUSG00000074215 | Gm10643       | 0.45  | 0.26  | 6.27  | 6.72  | 6.10  | 6.36  | 10.17 | 0.0033103 | 0.047833 | ZT4  |
| ENSMUSG00000042817 | Flt3          | -0.95 | -0.31 | 6.29  | 5.33  | 6.00  | 5.68  | 10.17 | 0.0033183 | 0.047845 | ZT4  |
| ENSMUSG00000033533 | Acsm1         | 0.34  | 0.45  | 13.72 | 14.06 | 13.91 | 14.36 | 10.17 | 0.0033185 | 0.047845 | ZT16 |
| ENSMUSG00000008305 | Tle1          | 0.33  | 0.25  | 9.08  | 9.41  | 9.14  | 9.40  | 10.16 | 0.003322  | 0.047845 | ZT4  |
| ENSMUSG00000024462 | Gabbr1        | 0.56  | 0.25  | 10.16 | 10.72 | 9.87  | 10.13 | 10.14 | 0.0033525 | 0.048231 | ZT4  |
| ENSMUSG00000022468 | Endou         | 0.38  | 0.89  | 7.25  | 7.63  | 6.21  | 7.10  | 10.13 | 0.0033617 | 0.048312 | ZT16 |
| ENSMUSG00000026547 | Tagln2        | -0.12 | -0.27 | 12.55 | 12.42 | 12.87 | 12.60 | 10.11 | 0.0033795 | 0.048468 | ZT16 |
| ENSMUSG00000017453 | Pipox         | -0.50 | -0.47 | 15.00 | 14.49 | 15.36 | 14.89 | 10.11 | 0.0033799 | 0.048468 | ZT4  |
| ENSMUSG00000045672 | Col27a1       | -0.33 | -0.97 | 10.74 | 10.41 | 11.44 | 10.47 | 10.10 | 0.0033943 | 0.048622 | ZT16 |
| ENSMUSG00000034957 | Cebpa         | 0.49  | 0.17  | 9.36  | 9.85  | 9.51  | 9.68  | 10.09 | 0.0034134 | 0.048843 | ZT4  |
| ENSMUSG00000028559 | Osbpl9        | -0.33 | -0.46 | 14.39 | 14.06 | 14.91 | 14.45 | 10.06 | 0.0034407 | 0.049181 | ZT16 |
| ENSMUSG00000050100 | Hmx2          | 0.70  | 0.16  | 8.11  | 8.81  | 8.11  | 8.27  | 10.05 | 0.0034605 | 0.04938  | ZT4  |
| ENSMUSG00000021186 | Fbln5         | -0.15 | -0.30 | 13.45 | 13.30 | 13.39 | 13.09 | 10.04 | 0.0034639 | 0.04938  | ZT16 |
| ENSMUSG00000056487 | Mettl7a2      | -0.20 | -0.49 | 11.74 | 11.54 | 11.91 | 11.42 | 10.04 | 0.0034658 | 0.04938  | ZT16 |
| ENSMUSG00000033902 | Mapkbp1       | 0.62  | 0.64  | 9.72  | 10.33 | 9.28  | 9.92  | 10.04 | 0.0034695 | 0.049381 | ZT16 |
| ENSMUSG00000033653 | Vps8          | -0.39 | -0.22 | 11.96 | 11.57 | 11.95 | 11.72 | 10.03 | 0.0034833 | 0.049523 | ZT4  |

**Supplemental Table 5.** GO Biological processes significantly enriched in cKO mice (differentially expressed genes).

| Description                       | GO ID      | P-value  | Enrichment Factor | ZT time   | Genes                                                                                                                                                                                                                                                                                                                                                                                                                                                                                              |
|-----------------------------------|------------|----------|-------------------|-----------|----------------------------------------------------------------------------------------------------------------------------------------------------------------------------------------------------------------------------------------------------------------------------------------------------------------------------------------------------------------------------------------------------------------------------------------------------------------------------------------------------|
| oxoacid metabolic process         | GO:0043436 | 5.20E-19 | 3.38              | ZT4, ZT16 | Hpgds, Ppard, Scd1, Marc1, Slc22a5, Acot1, Cyp4a10, Tha1, Cyp4f14, Acadl, Cyp2e1, Lipa, Arg2, Ahcy, Crat, Cpt2, Nox4, Hkdc1, Azin1, Cpt1a, Ftcd, Aacs, Hao2, Acsl3, Asl, Ephx2, Bhmt, Ankrd23, Enpp1, Pecer, Gulo, Aspa, Ddc, Phyh, Agxt2, Suox, Prkag3, Cyp2d12, Hs6st2, Gls, Glud1, Slc27a2, Slco1a6, Amt, Ltc4s, Cyp2d22, Abcd3, Ccbl1, Pah, Nr1h4, Cyp4a31, Ghr, Amdhd1, Pla2g5, Acy1, Angptl3, Cyp2j13, Dmgdh, Ces1d, Ldhb, Aldh9a1, Ggt1, Bhmt2, Ehhadh, Folh1, Acaa1b, Odc1, Cyp2a5, Cyp2a4 |
| organic acid metabolic process    | GO:0006082 | 1.64E-18 | 3.31              | ZT4, ZT16 | Hpgds, Ppard, Scd1, Slc22a5, Cyp4a10, Acot1, Tha1, Cyp4f14, Acadl, Cyp2e1, Lipa, Arg2, Ahcy, Crat, Cpt2, Nox4, Cpt1a, Hkdc1, Azin1, Ftcd, Aacs, Hao2, Acsl3, Ephx2, Asl, Bhmt, Ankrd23, Pecer, Aspa, Gulo, Phyh, Ddc, Agxt2, Prkag3, Cyp2d12, Gls, Glud1, Slc27a2, Slco1a6, Ltc4s, Amt, Cyp2d22, Abcd3, Ccbl1, Pah, Nr1h4, Cyp4a31, Ghr, Amdhd1, Pla2g5, Acy1, Angptl3, Cyp2j13, Dmgdh, Ces1d, Ldhb, Ggt1, Aldh9a1, Bhmt2, Ehhadh, Folh1, Acaa1b, Odc1, Cyp2a5, Cyp2a4                             |
| carboxylic acid metabolic process | GO:0019752 | 3.57E-18 | 3.42              | ZT4, ZT16 | Odc1, Cyp2a5, Cyp2a4                                                                                                                                                                                                                                                                                                                                                                                                                                                                               |

|                                            |            |          |      |           |                                                                                                                                                                                                                                                                                                                                                                                                                                              |
|--------------------------------------------|------------|----------|------|-----------|----------------------------------------------------------------------------------------------------------------------------------------------------------------------------------------------------------------------------------------------------------------------------------------------------------------------------------------------------------------------------------------------------------------------------------------------|
| cellular lipid metabolic process           | GO:0044255 | 5.95E-16 | 3.27 | ZT4, ZT16 | Hpgds, B4galt6, Ppard, Scd1, Cyp4a10, Acot1, Pi4ka, Lpcat3, Cyp4f14, Acadl, Cyp2e1, Lipa, Crat, Apoc3, Cpt2, Idi1, Pi4k2a, Cpt1a, Retsat, Aacs, Hao2, Acsl3, Ephx2, Aldh3a2, Psap, Mttp, Ankrd23, Pecr, Phyh, Naga, Prkag3, Cyp2d12, Gm2a, Bcml1, Chpt1, Slc27a2, Csf1r, Dgkh, Ltc4s, Cyp2d22, Abcd3, Ttr, Apob, Pla2g7, Cyp4a31, Cat, Ghr, Pla2g5, Cds1, Degs2, Angptl3, Cyp2j13, Ces1d, Mboat1, Ggt1, Pld2, Ehhadh, Acaa1b, Cyp2a5, Cyp2a4 |
| monocarboxylic acid metabolic process      | GO:0032787 | 1.54E-14 | 3.81 | ZT4, ZT16 | Hpgds, Ppard, Scd1, Slc22a5, Prkag3, Cyp2d12, Acot1, Cyp4a10, Cyp4f14, Acadl, Cyp2e1, Lipa, Slc27a2, Crat, Cpt2, Slco1a6, Ltc4s, Cyp2d22, Hkdc1, Cpt1a, Abcd3, Ccbl1, Nr1h4, Aacs, Cyp4a31, Hao2, Ghr, Pla2g5, Acsl3, Ephx2, Angptl3, Cyp2j13, Ankrd23, Ces1d, Ldhd, Aldh9a1, Ggt1, Pecr, Aspa, Ehhadh, Phyh, Acaa1b, Agxt2, Cyp2a5, Cyp2a4                                                                                                  |
| fatty acid metabolic process               | GO:0006631 | 3.83E-14 | 4.53 | ZT4, ZT16 | Hpgds, Ppard, Scd1, Prkag3, Cyp2d12, Cyp4a10, Acot1, Cyp4f14, Cyp2e1, Acadl, Lipa, Slc27a2, Crat, Cpt2, Ltc4s, Cyp2d22, Cpt1a, Abcd3, Aacs, Cyp4a31, Hao2, Ghr, Pla2g5, Acsl3, Ephx2, Angptl3, Ankrd23, Cyp2j13, Ces1d, Ggt1, Pecr, Ehhadh, Phyh, Acaa1b, Cyp2a5, Cyp2a4                                                                                                                                                                     |
| chemical homeostasis                       | GO:0048878 | 3.59E-12 | 2.8  | ZT4, ZT16 | Slc22a17, Cldn1, Nr1d2, Scd1, Cyp27b1, Agt, Neo1, Acadl, Slc4a5, Apoc3, Aqp1, Slc34a2, Hkdc1, Slc9a3r1, Aqp8, Ttpa, Chrna7, Aacs, Cp, Slc39a5, Ccl28, F2, Pde6a, Herpud1, Ephx2, Hmox1, Mttp, Slc16a1, Psen1, Stc2, Cftr, Pygl, Slc4a9, Fabp3, Sox4, Enpp1, Angptl4, Chp1, Steap2, Prnp, Napsa, Avpr1a, Slco1a6, Fkbp1b, Grina, Aqp11, Anxa7, Tmprss13, Sfn, Apob, Cdh1, Cry1, Angptl3, Car14, Camk2d, Ank2                                  |
| organic hydroxy compound metabolic process | GO:1901615 | 5.13E-12 | 3.85 | ZT4, ZT16 | Cyp27b1, Slc22a5, Cyp4a10, Chpt1, Miox, Acadl, Lipa, Sord, Slc27a2, Crat, Apoc3, Slco1a6, Cyp2d22, Sqle, Cpt1a, Ttr, Retsat, Ttpa, Nr1h4, Apob, Pnpo, Cyp4a31, Cat, Hao2, Pla2g5, Cyp27a1, Aldh3a2, Degs2, Mttp, Angptl3, Cftr, Ldhd, Aldh9a1, Pecr, Cyp24a1, Ddc                                                                                                                                                                            |

|                                         |            |          |      |           |                                                                                                                                                                                                                                                                                                       |
|-----------------------------------------|------------|----------|------|-----------|-------------------------------------------------------------------------------------------------------------------------------------------------------------------------------------------------------------------------------------------------------------------------------------------------------|
| organic anion transport                 | GO:0015711 | 6.16E-12 | 4.13 | ZT4, ZT16 | Slc2a2, Slc2a1, Slc22a17, Abca4, Slc22a5, Abcc3, Slc7a12, Abca13, Slc5a6, Slc22a8, Slc4a5, Slc27a2, Atp10b, Slc7a13, Plin2, Abcd3, Slc9a3r1, Aqp8, Slco3a1, Slc22a29, Pla2g5, Acsl3, Slc22a26, Slc25a42, Bdnf, Psen1, Cftr, Slc16a1, Slc4a9, Fabp3, Slc38a3, Slc51a, Slc10a2                          |
| anion transport                         | GO:0006820 | 4.37E-10 | 3.29 | ZT4, ZT16 | Slc2a2, Slc2a1, Slc22a17, Abca4, Slc22a5, Abcc3, Slc7a12, Slc5a6, Slc20a2, Abca13, Slc27a2, Slc22a8, Slc4a5, Atp10b, Slc7a13, Plin2, Abcd3, Slc34a2, Slc9a3r1, Aqp8, Slco3a1, Slc22a29, Pla2g5, Slc22a26, Acsl3, Slc25a42, Bdnf, Cftr, Psen1, Slc16a1, Slc4a9, Fabp3, Enpp1, Slc38a3, Slc51a, Slc10a2 |
| protein activation cascade              | GO:0072376 | 2.52E-08 | 8.99 | ZT4, ZT16 | C4b, Cfi, Masp2, Fga, Mbl1, Cd55, Fgg, C2, Cr2, C8a, Fgb Apob, Pla2g7, Cyp4a31, Cyp27b1, Cyp4a10, Gm2a, Pla2g5, Acadl, Lipa, Hsd11b1, Slc27a2, Srd5a2, Angptl3, Apoc3, Ces1d, Ddhd1, Pld2, Abcd3, Ehhadh, Phyh, Naga, Nceh1                                                                           |
| lipid catabolic process                 | GO:0016042 | 3.70E-08 | 4    | ZT4, ZT16 | Slc22a5, Abcc3, Slc5a6, Pla2g5, Acsl3, Slc27a2, Slc16a1, Fabp3, Plin2, Abcd3, Slc9a3r1, Aqp8, Slco3a1, Slc51a, Slc10a2                                                                                                                                                                                |
| monocarboxylic acid transport           | GO:0015718 | 4.09E-08 | 5.82 | ZT4, ZT16 | Cyp4a31, Cyp2d12, Cyp4a10, Acot1, Cyp4f14, Acsl3, Ephx2, Cyp2e1, Acadl, Slc27a2, Cyp2j13, Cyp2d22, Cpt1a, Cyp2a5, Cyp2a4                                                                                                                                                                              |
| long-chain fatty acid metabolic process | GO:0001676 | 4.69E-08 | 5.76 | ZT4, ZT16 | Pah, Ghr, Tha1, Amdhd1, Glc, Asl, Glud1, Bhmt, Arg2, Ahcy, Amt, Dmgdh, Ggt1, Bhmt2, Nox4, Ccbl1, Azin1, Folh1, Agxt2, Odc1, Ftc                                                                                                                                                                       |
| alpha-amino acid metabolic process      | GO:1901605 | 5.14E-08 | 4.09 | ZT4, ZT16 | Hpgds, Scd1, Cyp27b1, Prkag3, Tha1, Chpt1, Glc, Glud1, Slc27a2, Ahcy, Ltc4s, Abcd3, Pah, Pnpo, Adck3, Pla2g5, Acsl3, Cyp27a1, Asl, Bhmt, Cftr, Ldhd, Ggt1, Pecr, Bhmt2, Gulo, Agxt2                                                                                                                   |
| small molecule biosynthetic process     | GO:0044283 | 6.87E-08 | 3.29 | ZT4, ZT16 | Pah, Cyp4a31, Cyp27b1, Cyp4a10, Amdhd1, Tha1, Miox, Glc, Acadl, Glud1, Sord, Arg2, Slc27a2, Ahcy, Ces1d, Amt, Abcd3, Ehhadh, Phyh, Agxt2, Ftc                                                                                                                                                         |
| small molecule catabolic process        | GO:0044282 | 8.64E-08 | 3.97 | ZT4, ZT16 | Pah, Cyp4a31, Cyp4a10, Amdhd1, Tha1, Glc, Acadl, Glud1, Arg2, Slc27a2, Ahcy, Ces1d, Amt, Abcd3, Ehhadh, Phyh, Agxt2, Ftc                                                                                                                                                                              |
| organic acid catabolic process          | GO:0016054 | 1.14E-07 | 4.49 | ZT4, ZT16 | Pah, Cyp4a31, Cyp4a10, Amdhd1, Tha1, Glc, Acadl, Glud1, Arg2, Slc27a2, Ahcy, Ces1d, Amt, Abcd3, Ehhadh, Phyh, Agxt2, Ftc                                                                                                                                                                              |
| carboxylic acid catabolic process       | GO:0046395 | 1.14E-07 | 4.49 | ZT4, ZT16 | Slc27a2, Ahcy, Ces1d, Amt, Abcd3, Ehhadh, Phyh, Agxt2, Ftc                                                                                                                                                                                                                                            |



|                                          |            |          |       |           |                                                                                                                                                                                                                                                               |
|------------------------------------------|------------|----------|-------|-----------|---------------------------------------------------------------------------------------------------------------------------------------------------------------------------------------------------------------------------------------------------------------|
| cellular chemical homeostasis            | GO:0055082 | 1.65E-07 | 2.76  | ZT4, ZT16 | Prnp, Agt, Slc4a5, Avpr1a, Apoc3, Aqp1, Fkbp1b, Hkdc1, Slc34a2, Grina, Slc9a3r1, Aqp11, Aqp8, Anxa7, Ttpa, Chrna7, Aacs, Cp, Slc39a5, Ccl28, F2, Pde6a, Herpud1, Hmox1, Cftr, Stc2, Psen1, Slc4a9, Enpp1, Sox4, Chp1, Camk2d, Ank2                            |
| unsaturated fatty acid metabolic process | GO:0033559 | 1.71E-07 | 5.24  | ZT4, ZT16 | Hpgds, Scd1, Cyp4a31, Cyp2d12, Cyp4a10, Cyp4f14, Pla2g5, Cyp2e1, Ephx2, Cyp2j13, Ltc4s, Ggt1, Cyp2d22, Cyp2a5, Cyp2a4 Pah, Hpgds, Scd1, Prkag3, Tha1, Pla2g5, Acsl3, Gls, Asl, Glud1, Bhmt, Slc27a2, Ahcy, Ltc4s, Ldhd, Ggt1, Bhmt2, Pecr, Gulo, Abcd3, Agxt2 |
| organic acid biosynthetic process        | GO:0016053 | 2.30E-07 | 3.75  | ZT4, ZT16 | Pah, Hpgds, Scd1, Prkag3, Tha1, Pla2g5, Acsl3, Gls, Asl, Glud1, Bhmt, Slc27a2, Ahcy, Ltc4s, Ldhd, Ggt1, Bhmt2, Pecr, Gulo, Abcd3, Agxt2                                                                                                                       |
| carboxylic acid biosynthetic process     | GO:0046394 | 2.30E-07 | 3.75  | ZT4, ZT16 | Slc22a5, Abcc3, Slc7a12, Slc5a6, Pla2g5, Acsl3, Slc27a2, Bdnf, Psen1, Slc7a13, Slc16a1, Fabp3, Plin2, Abcd3, Slc9a3r1, Slc38a3, Aqp8, Slco3a1, Slc51a, Slc10a2                                                                                                |
| carboxylic acid transport                | GO:0046942 | 3.04E-07 | 3.84  | ZT4, ZT16 | 1300002K09Rik, Apob, Abca4, Abcc3, Abca13, Pla2g5, Acsl3, Slc27a2, Mtthp, Apoc3, Atp10b, Cftr, Fabp3, Plin2, Abcd3, Slc9a3r1, Aqp8, Slco3a1, Slc51a, Slc10a2                                                                                                  |
| lipid transport                          | GO:0006869 | 3.58E-07 | 3.8   | ZT4, ZT16 | Slc9a3r1, Aqp8, Slco3a1, Slc51a, Slc10a2                                                                                                                                                                                                                      |
| organic acid transport                   | GO:0015849 | 3.58E-07 | 3.8   | ZT4, ZT16 | Slc22a5, Abcc3, Slc7a12, Slc5a6, Pla2g5, Acsl3, Slc27a2, Bdnf, Psen1, Slc7a13, Slc16a1, Fabp3, Plin2, Abcd3, Slc9a3r1, Slc38a3, Aqp8, Slco3a1, Slc51a, Slc10a2                                                                                                |
| cellular amino acid metabolic process    | GO:0006520 | 4.22E-07 | 3.37  | ZT4, ZT16 | Pah, Ghr, Amdhd1, Tha1, Gls, Asl, Glud1, Bhmt, Acy1, Arg2, Ahcy, Amt, Dmgdh, Ggt1, Bhmt2, Nox4, Azin1, Ddc, Ccbl1, Folh1, Agxt2, Odc1, Ftcd                                                                                                                   |
| amino-acid betaine metabolic process     | GO:0006577 | 4.46E-07 | 17.72 | ZT4, ZT16 | Crat, Slc22a5, Aldh9a1, Cpt1a, Acadl, Bhmt                                                                                                                                                                                                                    |
| ion homeostasis                          | GO:0050801 | 7.40E-07 | 2.54  | ZT4, ZT16 | Prnp, Slc22a17, Cyp27b1, Agt, Neo1, Slc4a5, Avpr1a, Fkbp1b, Slc34a2, Grina, Slc9a3r1, Anxa7, Aqp11, Ttpa, Chrna7, Cp, Slc39a5, Ccl28, F2, Pde6a, Herpud1, Hmox1, Angptl3, Cftr, Stc2, Psen1, Slc4a9, Fabp3, Enpp1, Car14, Chp1, Camk2d, Ank2, Steap2          |
| steroid metabolic process                | GO:0008202 | 7.64E-07 | 3.78  | ZT4, ZT16 | Nr1h4, Apob, Scd1, Cat, Cyp27b1, Hsd3b3, Cyp27a1, Cyp2e1, Lipa, Hsd11b1, Slc27a2, Srd5a2, Mtthp, Angptl3, Apoc3, Cftr, Slco1a6, Sqle, Cyp24a1                                                                                                                 |

|                                                     |            |          |       |           |                                                                                                                                                                                                                                                                                                                                                                                                                                                                                                                                                                                                                                                                                                                                                                                     |
|-----------------------------------------------------|------------|----------|-------|-----------|-------------------------------------------------------------------------------------------------------------------------------------------------------------------------------------------------------------------------------------------------------------------------------------------------------------------------------------------------------------------------------------------------------------------------------------------------------------------------------------------------------------------------------------------------------------------------------------------------------------------------------------------------------------------------------------------------------------------------------------------------------------------------------------|
| vitamin metabolic process                           | GO:0006766 | 1.62E-06 | 7.85  | ZT4, ZT16 | Ppard, Pnpo, Cyp27b1, Gulo, Cyp24a1, Cbr1, Cyp27a1, Acpp, Ttpa, Prnp, Slc22a17, Cyp27b1, Agt, Neo1, Slc4a5, Avpr1a, Fkbp1b, Slc34a2, Grina, Slc9a3r1, Anxa7, Aqp11, Ttpa, Chrna7, Cp, Slc39a5, Ccl28, F2, Pde6a, Herpud1, Hmox1, Cftr, Psen1, Stc2,                                                                                                                                                                                                                                                                                                                                                                                                                                                                                                                                 |
| inorganic ion homeostasis                           | GO:0098771 | 2.15E-06 | 2.5   | ZT4, ZT16 | Slc4a9, Enpp1, Car14, Chp1, Camk2d, Steap2, Ank2<br><br>Slc2a2, Slc2a1, 1300002K09Rik, Slc22a17, Abca4, Cyp27b1, Slc22a5, Lin7a, Slc20a2, Serpina7, Spag9, Slc22a8, Slc4a5, Apoc3, Aqp1, Rab11fip1, Slc34a2, Abcb1b, Aqp8, Abcb1a, Ttpa, Chrna7, Map1b, Slc39a5, Acsl3, Pigr, Tspan1, Mttp, Slc16a1, Cftr, Psen1, Fabp3, Enpp1, Kcnp2, Ddc, Chp1, Slc10a2, Slc45a3, Slc2a5, Slc46a3, Prkag3, Abcc3, Slc27a2, Slc7a13, Fgg, Gle1, Plin2, Abcd3, Ccnd1, Aqp11, Apob, Pla2g5, Hrg, Slc25a42, Car14, Pld2, Unc13c, Prickle1, Cadps2, Slc38a3, Slc25a33, Prss8, Agt, Slc7a12, Abca13, Slc5a6, Atp10b, Pi4k2a, Slc9a3r1, Sort1, Gria3, Cp, Herpud1, Bdnf, Grid1, Slc4a9, Tnfaip2, Slc51a, Steap2, Fgfr2, Prlr, Cd302, Trpm3, Slco1a6, Gjb2, Fkbp1b, Nlrc4, Ttr, Sec13, Slco3a1, Slc22a29, |
| single-organism transport                           | GO:0044765 | 2.47E-06 | 1.58  | ZT4, ZT16 | Slc22a26, Samm50, Syng1, Camk2d, Slc23a3, Rasgrp1, Ank2, 1300002K09Rik, Apob, Abca4, Slc22a5, Abcc3, Abca13, Slc16a1,                                                                                                                                                                                                                                                                                                                                                                                                                                                                                                                                                                                                                                                               |
| organic hydroxy compound transport                  | GO:0015850 | 2.70E-06 | 4.52  | ZT4, ZT16 | Cftr, Psen1, Aqp1, Slc9a3r1, Aqp8, Slc51a, Slc10a2, Hpgds, Cyp4a31, Cyp4a10, Cyp2d12, Cyp4f14, Pla2g5, Cyp2e1,                                                                                                                                                                                                                                                                                                                                                                                                                                                                                                                                                                                                                                                                      |
| icosanoid metabolic process                         | GO:0006690 | 3.44E-06 | 4.75  | ZT4, ZT16 | Cyp2j13, Ltc4s, Cyp2d22, Ggt1, Cyp2a5, Cyp2a4                                                                                                                                                                                                                                                                                                                                                                                                                                                                                                                                                                                                                                                                                                                                       |
| regulation of cellular response to oxidative stress | GO:1900407 | 1.28E-06 | 12.63 | ZT16      | Fbln5, Sod2, Sod1, Nr4a3, Hsph1, Hdac6, Atf4                                                                                                                                                                                                                                                                                                                                                                                                                                                                                                                                                                                                                                                                                                                                        |
| regulation of response to oxidative stress          | GO:1902882 | 2.09E-06 | 11.78 | ZT16      | Fbln5, Sod2, Sod1, Nr4a3, Hsph1, Hdac6, Atf4                                                                                                                                                                                                                                                                                                                                                                                                                                                                                                                                                                                                                                                                                                                                        |

**Supplemental Table 6.** Plasma metabolome data: Control vs cKO mice.

**Amino acids & Biogenic amines ( $\mu\text{M}$ )**

|                   | Ctrl (ZT4, n=6) |        | cKO (ZT4, n=6) |       | p (t-test) | Ctrl (ZT16, n=6) |        | cKO (ZT16, n=5) |        | p (t-test) |
|-------------------|-----------------|--------|----------------|-------|------------|------------------|--------|-----------------|--------|------------|
|                   | mean            | SD     | mean           | SD    |            | mean             | SD     | mean            | SD     |            |
| <b>Ala</b>        | 289.50          | 105.73 | 318.50         | 76.25 | NS         | 274.83           | 60.77  | 349.90          | 105.80 | NS         |
| <b>Arg</b>        | 64.98           | 36.65  | 76.90          | 20.18 | NS         | 56.92            | 7.19   | 94.47           | 10.86  | 7E-05      |
| <b>Asn</b>        | 27.52           | 14.83  | 23.45          | 3.54  | NS         | 22.90            | 9.59   | 22.45           | 4.36   | NS         |
| <b>Asp</b>        | 0.09            | 0.22   | 0.03           | 0.08  | NS         | 0.86             | 1.13   | 1.09            | 1.20   | NS         |
| <b>Cit</b>        | 65.03           | 25.38  | 92.15          | 20.60 | NS         | 64.10            | 23.08  | 62.33           | 8.10   | NS         |
| <b>Gln</b>        | 650.17          | 149.41 | 521.67         | 87.44 | NS         | 650.33           | 204.01 | 657.60          | 112.06 | NS         |
| <b>Glu</b>        | 48.50           | 9.54   | 81.52          | 21.40 | 0.0062     | 46.73            | 9.08   | 61.13           | 14.21  | NS         |
| <b>Gly</b>        | 248.00          | 63.07  | 232.50         | 58.85 | NS         | 213.50           | 51.88  | 210.50          | 91.68  | NS         |
| <b>His</b>        | 61.57           | 8.48   | 63.32          | 3.61  | NS         | 58.03            | 7.43   | 69.75           | 13.38  | NS         |
| <b>Ile</b>        | 80.00           | 26.29  | 84.98          | 16.67 | NS         | 72.02            | 17.38  | 68.53           | 18.03  | NS         |
| <b>Leu</b>        | 134.98          | 46.68  | 145.50         | 24.69 | NS         | 118.98           | 26.55  | 125.31          | 32.80  | NS         |
| <b>Lys</b>        | 290.17          | 46.90  | 308.17         | 67.97 | NS         | 218.17           | 65.14  | 269.20          | 54.33  | NS         |
| <b>Met</b>        | 47.05           | 10.68  | 44.23          | 7.98  | NS         | 39.28            | 5.92   | 56.01           | 14.59  | 0.0294     |
| <b>Orn</b>        | 93.57           | 44.68  | 86.95          | 17.90 | NS         | 63.72            | 18.46  | 66.16           | 13.08  | NS         |
| <b>Phe</b>        | 65.58           | 17.39  | 64.28          | 5.99  | NS         | 67.15            | 6.44   | 65.10           | 13.95  | NS         |
| <b>Pro</b>        | 88.90           | 32.20  | 90.85          | 21.08 | NS         | 91.25            | 19.17  | 99.90           | 27.76  | NS         |
| <b>Ser</b>        | 115.92          | 43.36  | 122.48         | 34.47 | NS         | 124.35           | 71.31  | 110.80          | 32.53  | NS         |
| <b>Thr</b>        | 109.75          | 24.73  | 100.33         | 25.39 | NS         | 109.12           | 18.65  | 115.89          | 15.35  | NS         |
| <b>Trp</b>        | 69.47           | 20.05  | 62.88          | 20.79 | NS         | 79.50            | 17.81  | 60.60           | 21.12  | NS         |
| <b>Tyr</b>        | 87.22           | 23.88  | 91.85          | 9.01  | NS         | 59.53            | 12.40  | 70.60           | 23.58  | NS         |
| <b>Val</b>        | 249.83          | 102.55 | 251.33         | 24.89 | NS         | 259.33           | 24.20  | 260.30          | 59.04  | NS         |
| <b>Ac-Orn</b>     | 0.00            | 0.00   | 0.00           | 0.00  | NS         | 0.00             | 0.00   | 0.00            | 0.00   | NS         |
| <b>ADMA</b>       | 0.89            | 0.20   | 0.91           | 0.18  | NS         | 0.55             | 0.13   | 0.79            | 0.14   | 0.0145     |
| <b>alpha-AAA</b>  | 12.41           | 2.93   | 13.67          | 2.80  | NS         | 9.52             | 4.42   | 9.20            | 6.05   | NS         |
| <b>c4-OH-Pro</b>  | 0.00            | 0.00   | 0.00           | 0.00  | NS         | 0.00             | 0.00   | 0.00            | 0.00   | NS         |
| <b>Carnosine</b>  | 0.79            | 0.16   | 0.90           | 0.20  | NS         | 0.72             | 0.05   | 0.91            | 0.16   | 0.0226     |
| <b>Creatinine</b> | 14.85           | 2.20   | 22.77          | 2.01  | 7E-05      | 13.03            | 1.05   | 21.90           | 3.13   | 0.0001     |
| <b>DOPA</b>       | 0.00            | 0.00   | 0.00           | 0.00  | NS         | 0.00             | 0.00   | 0.00            | 0.00   | NS         |
| <b>Dopamine</b>   | 0.00            | 0.00   | 0.00           | 0.00  | NS         | 0.00             | 0.00   | 0.00            | 0.00   | NS         |
| <b>Histamine</b>  | 0.28            | 0.11   | 0.30           | 0.13  | NS         | 0.21             | 0.07   | 0.21            | 0.09   | NS         |
| <b>Kynurenine</b> | 0.23            | 0.12   | 0.49           | 0.29  | NS         | 0.46             | 0.13   | 0.51            | 0.15   | NS         |
| <b>Met-SO</b>     | 2.36            | 0.81   | 2.47           | 0.70  | NS         | 3.85             | 0.97   | 4.61            | 1.23   | NS         |
| <b>Nitro-Tyr</b>  | 0.00            | 0.00   | 0.00           | 0.00  | NS         | 0.00             | 0.00   | 0.00            | 0.00   | NS         |
| <b>PEA</b>        | 0.00            | 0.00   | 0.00           | 0.00  | NS         | 0.00             | 0.00   | 0.00            | 0.00   | NS         |
| <b>Putrescine</b> | 0.63            | 0.24   | 0.76           | 0.39  | NS         | 0.39             | 0.16   | 0.29            | 0.14   | NS         |
| <b>SDMA</b>       | 0.16            | 0.38   | 0.59           | 0.46  | NS         | 0.14             | 0.34   | 0.00            | 0.00   | NS         |
| <b>Serotonin</b>  | 1.21            | 1.98   | 0.59           | 0.27  | NS         | 0.98             | 0.44   | 0.70            | 0.13   | NS         |
| <b>Spermidine</b> | 0.52            | 0.21   | 0.62           | 0.15  | NS         | 0.38             | 0.05   | 0.36            | 0.05   | NS         |
| <b>Spermine</b>   | 0.17            | 0.01   | 0.18           | 0.02  | NS         | 0.16             | 0.01   | 0.16            | 0.01   | NS         |
| <b>t4-OH-Pro</b>  | 18.38           | 7.03   | 18.65          | 3.34  | NS         | 24.80            | 8.95   | 27.14           | 4.55   | NS         |

|                |        |       |        |       |    |        |       |        |       |        |
|----------------|--------|-------|--------|-------|----|--------|-------|--------|-------|--------|
| <b>Taurine</b> | 309.50 | 47.94 | 339.67 | 38.56 | NS | 257.17 | 22.41 | 308.40 | 40.35 | 0.0255 |
|----------------|--------|-------|--------|-------|----|--------|-------|--------|-------|--------|

**Acylcarnitines (μM)**

|                 | Ctrl (ZT4, n=6) |        | cKO (ZT4, n=6) |        | p (t-test) | Ctrl (ZT16, n=6) |        | cKO (ZT16, n=5) |        | p (t-test) |
|-----------------|-----------------|--------|----------------|--------|------------|------------------|--------|-----------------|--------|------------|
|                 | mean            | SD     | mean           | SD     |            | mean             | SD     | mean            | SD     |            |
| <b>C0</b>       | 18.6250         | 2.2475 | 10.0018        | 1.7913 | 2E-05      | 15.4867          | 2.9145 | 8.8401          | 1.8097 | 0.0017     |
| <b>C2</b>       | 4.7788          | 2.2256 | 2.8003         | 1.0550 | NS         | 3.3960           | 1.3358 | 1.9407          | 0.6766 | NS         |
| <b>C3</b>       | 0.1679          | 0.0799 | 0.0980         | 0.0303 | NS         | 0.1746           | 0.0748 | 0.0778          | 0.0212 | 0.0214     |
| <b>C3:1</b>     | 0.0138          | 0.0028 | 0.0126         | 0.0012 | NS         | 0.0132           | 0.0019 | 0.0128          | 0.0012 | NS         |
| <b>C3-DC</b>    | 0.0821          | 0.0144 | 0.0692         | 0.0098 | NS         | 0.0683           | 0.0094 | 0.0694          | 0.009  | NS         |
| <b>C3-OH</b>    | 0.0202          | 0.0014 | 0.0199         | 0.0015 | NS         | 0.0200           | 0.0024 | 0.0208          | 0.0021 | NS         |
| <b>C4</b>       | 0.1510          | 0.067  | 0.0916         | 0.020  | NS         | 0.1306           | 0.0602 | 0.0782          | 0.021  | NS         |
| <b>C4:1</b>     | 0.0389          | 0.0113 | 0.0367         | 0.0103 | NS         | 0.0335           | 0.0066 | 0.0357          | 0.0028 | NS         |
| <b>C5</b>       | 0.0887          | 0.0337 | 0.0608         | 0.0124 | NS         | 0.0800           | 0.0150 | 0.0601          | 0.0134 | 0.0471     |
| <b>C5:1</b>     | 0.0335          | 0.0072 | 0.031          | 0.0023 | NS         | 0.0312           | 0.0046 | 0.0343          | 0.0037 | NS         |
| <b>C5:1-DC</b>  | 0.0109          | 0.0019 | 0.0102         | 0.0014 | NS         | 0.0081           | 0.0017 | 0.0099          | 0.0017 | NS         |
| <b>C5-DC</b>    | 0.0139          | 0.003  | 0.0169         | 0.0049 | NS         | 0.0160           | 0.0020 | 0.0153          | 0.0032 | NS         |
| <b>C5-M-DC</b>  | 0.0310          | 0.0018 | 0.0328         | 0.002  | NS         | 0.0320           | 0.0015 | 0.0332          | 0.0033 | NS         |
| <b>C5-OH</b>    | 0.0587          | 0.0062 | 0.0531         | 0.0042 | NS         | 0.0523           | 0.0067 | 0.0492          | 0.0061 | NS         |
| <b>C6</b>       | 0.0453          | 0.0049 | 0.0451         | 0.0057 | NS         | 0.0406           | 0.0041 | 0.0436          | 0.0051 | NS         |
| <b>C6:1</b>     | 0.0303          | 0.0033 | 0.0296         | 0.0047 | NS         | 0.0268           | 0.0012 | 0.0336          | 0.0013 | 8E-06      |
| <b>C7-DC</b>    | 0.0093          | 0.0016 | 0.0112         | 0.0016 | NS         | 0.0106           | 0.0013 | 0.0111          | 0.003  | NS         |
| <b>C8</b>       | 0.1161          | 0.0093 | 0.1179         | 0.0115 | NS         | 0.1017           | 0.0074 | 0.114           | 0.0114 | NS         |
| <b>C9</b>       | 0.0195          | 0.0033 | 0.0210         | 0.0025 | NS         | 0.0183           | 0.0027 | 0.0201          | 0.0014 | NS         |
| <b>C10</b>      | 0.1389          | 0.0334 | 0.1260         | 0.0310 | NS         | 0.1204           | 0.0138 | 0.1343          | 0.0177 | NS         |
| <b>C10:1</b>    | 0.0409          | 0.0046 | 0.0385         | 0.0058 | NS         | 0.0368           | 0.007  | 0.0407          | 0.0057 | NS         |
| <b>C10:2</b>    | 0.0438          | 0.0055 | 0.0463         | 0.0038 | NS         | 0.0443           | 0.0034 | 0.0472          | 0.0036 | NS         |
| <b>C12</b>      | 0.0401          | 0.0053 | 0.0397         | 0.0083 | NS         | 0.0360           | 0.002  | 0.0353          | 0.0032 | NS         |
| <b>C12:1</b>    | 0.0408          | 0.0063 | 0.0411         | 0.0087 | NS         | 0.0405           | 0.0056 | 0.0443          | 0.0061 | NS         |
| <b>C12-DC</b>   | 0.0894          | 0.0049 | 0.0918         | 0.0063 | NS         | 0.0884           | 0.0042 | 0.0908          | 0.0024 | NS         |
| <b>C14</b>      | 0.0334          | 0.0137 | 0.0298         | 0.0097 | NS         | 0.0197           | 0.0021 | 0.0174          | 0.001  | NS         |
| <b>C14:1</b>    | 0.0425          | 0.0068 | 0.0423         | 0.0065 | NS         | 0.0297           | 0.0038 | 0.0353          | 0.0013 | 0.0115     |
| <b>C14:1-OH</b> | 0.0107          | 0.0019 | 0.0095         | 0.0019 | NS         | 0.0076           | 0.0013 | 0.008           | 0.001  | NS         |
| <b>C14:2</b>    | 0.0085          | 0.0024 | 0.0073         | 0.0021 | NS         | 0.0052           | 0.0006 | 0.0059          | 0.0009 | NS         |
| <b>C14:2-OH</b> | 0.0113          | 0.0020 | 0.0114         | 0.0009 | NS         | 0.0107           | 0.0011 | 0.0105          | 0.0005 | NS         |
| <b>C16</b>      | 0.1096          | 0.0469 | 0.0961         | 0.0355 | NS         | 0.0541           | 0.0091 | 0.0463          | 0.0055 | NS         |
| <b>C16:1</b>    | 0.0408          | 0.0120 | 0.0399         | 0.0115 | NS         | 0.0282           | 0.0012 | 0.0277          | 0.0024 | NS         |
| <b>C16:1-OH</b> | 0.0074          | 0.0017 | 0.0073         | 0.0013 | NS         | 0.0051           | 0.0008 | 0.0051          | 0.0004 | NS         |
| <b>C16:2</b>    | 0.0077          | 0.0027 | 0.0080         | 0.0021 | NS         | 0.0054           | 0.0006 | 0.0054          | 0.0006 | NS         |
| <b>C16:2-OH</b> | 0.0097          | 0.0010 | 0.0099         | 0.0015 | NS         | 0.0093           | 0.0015 | 0.01            | 0.0011 | NS         |
| <b>C16-OH</b>   | 0.0130          | 0.0009 | 0.0117         | 0.0017 | NS         | 0.0123           | 0.0024 | 0.0118          | 0.0015 | NS         |
| <b>C18</b>      | 0.0333          | 0.0076 | 0.0327         | 0.0075 | NS         | 0.022            | 0.004  | 0.026           | 0.003  | NS         |
| <b>C18:1</b>    | 0.0914          | 0.0449 | 0.0894         | 0.0365 | NS         | 0.0402           | 0.0076 | 0.0393          | 0.0045 | NS         |
| <b>C18:1-OH</b> | 0.0148          | 0.0034 | 0.0149         | 0.0026 | NS         | 0.0116           | 0.0027 | 0.0114          | 0.0007 | NS         |
| <b>C18:2</b>    | 0.0375          | 0.0199 | 0.0324         | 0.0107 | NS         | 0.0162           | 0.0028 | 0.016           | 0.0031 | NS         |

### Lysophosphatidylcholines ( $\mu\text{M}$ )

|          | Ctrl (ZT4, n=6) |        | cKO (ZT4, n=6) |        | p (t-test) | Ctrl (ZT16, n=6) |        | cKO (ZT16, n=6) |        | p (t-test) |
|----------|-----------------|--------|----------------|--------|------------|------------------|--------|-----------------|--------|------------|
|          | mean            | SD     | mean           | SD     |            | mean             | SD     | mean            | SD     |            |
| lysoPC a |                 |        |                |        |            |                  |        |                 |        |            |
| C14:0    | 2.7752          | 0.2097 | 2.8368         | 0.2043 | NS         | 2.531            | 0.1742 | 2.5193          | 0.1419 | NS         |
| lysoPC a |                 |        |                |        |            |                  |        |                 |        |            |
| C16:0    | 227.17          | 26.992 | 202            | 26.015 | NS         | 213.5            | 24.761 | 204.3           | 15.007 | NS         |
| lysoPC a |                 |        |                |        |            |                  |        |                 |        |            |
| C16:1    | 5.6563          | 2.0782 | 4.0555         | 1.2966 | NS         | 4.007            | 0.9617 | 2.6472          | 0.8135 | 0.034      |
| lysoPC a |                 |        |                |        |            |                  |        |                 |        |            |
| C17:0    | 4.1055          | 0.6568 | 3.9348         | 0.7215 | NS         | 4.0232           | 0.4172 | 4.1439          | 0.2903 | NS         |
| lysoPC a |                 |        |                |        |            |                  |        |                 |        |            |
| C18:0    | 79.905          | 7.2309 | 82.847         | 4.7755 | NS         | 80.228           | 4.9004 | 86.032          | 4.6575 | NS         |
| lysoPC a |                 |        |                |        |            |                  |        |                 |        |            |
| C18:1    | 51.647          | 13.601 | 44.482         | 11.101 | NS         | 39.065           | 5.6918 | 36.414          | 6.441  | NS         |
| lysoPC a |                 |        |                |        |            |                  |        |                 |        |            |
| C18:2    | 134.67          | 21.824 | 137.17         | 8.9088 | NS         | 118              | 13.968 | 159.3           | 23.35  | 0.005      |
| lysoPC a |                 |        |                |        |            |                  |        |                 |        |            |
| C20:3    | 8.2847          | 2.3606 | 7.0668         | 1.3618 | NS         | 5.315            | 1.1523 | 5.2322          | 1.5094 | NS         |
| lysoPC a |                 |        |                |        |            |                  |        |                 |        |            |
| C20:4    | 19.923          | 7.1135 | 17.323         | 2.2546 | NS         | 15.793           | 3.2647 | 15.206          | 3.0183 | NS         |
| lysoPC a |                 |        |                |        |            |                  |        |                 |        |            |
| C24:0    | 0.7503          | 0.0744 | 0.7999         | 0.0773 | NS         | 0.6778           | 0.0403 | 0.707           | 0.042  | NS         |
| lysoPC a |                 |        |                |        |            |                  |        |                 |        |            |
| C26:0    | 0.187           | 0.0509 | 0.2535         | 0.0161 | 0.0123     | 0.142            | 0.0271 | 0.179           | 0.0739 | NS         |
| lysoPC a |                 |        |                |        |            |                  |        |                 |        |            |
| C26:1    | 0.088           | 0.0331 | 0.093          | 0.0171 | NS         | 0.0654           | 0.008  | 0.0795          | 0.021  | NS         |
| lysoPC a |                 |        |                |        |            |                  |        |                 |        |            |
| C28:0    | 0.2555          | 0.0391 | 0.3376         | 0.0686 | 0.0290     | 0.2167           | 0.0302 | 0.2746          | 0.0477 | 0.0366     |
| lysoPC a |                 |        |                |        |            |                  |        |                 |        |            |
| C28:1    | 0.1731          | 0.03   | 0.2131         | 0.0243 | 0.0293     | 0.1523           | 0.033  | 0.1588          | 0.063  | NS         |

### Phosphatidylcholines ( $\mu\text{M}$ )

|             | Ctrl (ZT4, n=6) |        | cKO (ZT4, n=6) |        | p (t-test) | Ctrl (ZT16, n=6) |        | cKO (ZT16, n=6) |        | p (t-test) |
|-------------|-----------------|--------|----------------|--------|------------|------------------|--------|-----------------|--------|------------|
|             | mean            | SD     | mean           | SD     |            | mean             | SD     | mean            | SD     |            |
| PC aa C24:0 | 0.0680          | 0.0214 | 0.0714         | 0.0128 | NS         | 0.0458           | 0.0060 | 0.0539          | 0.0119 | NS         |
| PC aa C26:0 | 0.6724          | 0.0757 | 0.7554         | 0.0648 | NS         | 0.6507           | 0.0637 | 0.7157          | 0.1177 | NS         |
| PC aa C28:1 | 0.2316          | 0.0548 | 0.2802         | 0.0608 | NS         | 0.1861           | 0.0495 | 0.2242          | 0.0416 | NS         |
| PC aa C30:0 | 0.5658          | 0.0428 | 0.7065         | 0.1450 | 0.0457     | 0.5989           | 0.0758 | 0.723           | 0.04   | 0.0095     |
| PC aa C30:2 | 0.0213          | 0.0225 | 0.0124         | 0.0183 | NS         | 0.0217           | 0.0145 | 0.0128          | 0.0205 | NS         |
| PC aa C32:0 | 6.3915          | 0.5778 | 6.4912         | 0.7401 | NS         | 7.4052           | 0.9264 | 7.3699          | 0.4106 | NS         |
| PC aa C32:1 | 2.5478          | 0.7517 | 2.3600         | 1.1577 | NS         | 2.1003           | 0.6700 | 1.5239          | 0.3815 | NS         |
| PC aa C32:2 | 0.6863          | 0.066  | 0.7644         | 0.1600 | NS         | 0.6549           | 0.1342 | 0.792           | 0.1442 | NS         |
| PC aa C32:3 | 0.1477          | 0.0144 | 0.1649         | 0.0226 | NS         | 0.1313           | 0.0190 | 0.1651          | 0.011  | 0.0067     |

|             |        |        |        |        |        |        |        |        |        |        |
|-------------|--------|--------|--------|--------|--------|--------|--------|--------|--------|--------|
| PC aa C34:1 | 111.76 | 24.13  | 100.31 | 39.48  | NS     | 81.91  | 23.78  | 65.33  | 7.59   | NS     |
| PC aa C34:2 | 275.17 | 37.72  | 291.17 | 32.39  | NS     | 264.33 | 45.84  | 328.30 | 9.55   | 0.014  |
| PC aa C34:3 | 9.3452 | 1.1079 | 9.2813 | 1.8304 | NS     | 7.6142 | 2.0726 | 7.8238 | 1.5792 | NS     |
| PC aa C34:4 | 0.2634 | 0.0271 | 0.2876 | 0.0394 | NS     | 0.2668 | 0.073  | 0.2791 | 0.056  | NS     |
| PC aa C36:0 | 2.8318 | 0.3803 | 3.0322 | 0.3144 | NS     | 2.7243 | 0.3951 | 3.2971 | 0.1521 | 0.0141 |
| PC aa C36:1 | 25.2   | 3.6196 | 27.248 | 6.0584 | NS     | 21.71  | 3.9572 | 23.371 | 1.3074 | NS     |
| PC aa C36:2 | 166    | 24.356 | 188.5  | 17.93  | NS     | 166.17 | 19.073 | 202.2  | 7.328  | 0.0033 |
| PC aa C36:3 | 64.59  | 8.1341 | 64.438 | 8.4052 | NS     | 60.05  | 10.013 | 66.153 | 6.3682 | NS     |
| PC aa C36:4 | 59.302 | 4.3831 | 60.412 | 3.5756 | NS     | 54.485 | 8.3557 | 59.636 | 3.7666 | NS     |
| PC aa C36:5 | 8.489  | 1.7186 | 8.8063 | 1.7075 | NS     | 8.1357 | 2.6941 | 8.2777 | 2.2617 | NS     |
| PC aa C36:6 | 0.3138 | 0.0539 | 0.351  | 0.054  | NS     | 0.2922 | 0.0828 | 0.302  | 0.062  | NS     |
| PC aa C38:0 | 2.263  | 0.1804 | 2.5848 | 0.3369 | NS     | 2.1763 | 0.3396 | 2.7279 | 0.1142 | 0.0073 |
| PC aa C38:1 | 0.9592 | 0.0731 | 0.8814 | 0.241  | NS     | 0.6899 | 0.1375 | 0.7681 | 0.072  | NS     |
| PC aa C38:3 | 20.315 | 2.3447 | 20.833 | 2.7949 | NS     | 17.25  | 2.3421 | 18.082 | 1.8866 | NS     |
| PC aa C38:4 | 28.495 | 0.5367 | 30.518 | 2.5153 | NS     | 24.292 | 3.4646 | 24.059 | 2.5836 | NS     |
| PC aa C38:5 | 19.09  | 2.4518 | 18.568 | 3.5646 | NS     | 14.929 | 3.0398 | 12.449 | 2.3986 | NS     |
| PC aa C38:6 | 84.878 | 10.751 | 88.983 | 19.227 | NS     | 61.192 | 15.882 | 56.641 | 4.774  | NS     |
| PC aa C40:1 | 0.4288 | 0.0328 | 0.5127 | 0.0604 | 0.0135 | 0.3868 | 0.0166 | 0.4686 | 0.0457 | 0.0026 |
| PC aa C40:2 | 0.5867 | 0.0719 | 0.8356 | 0.1794 | 0.0103 | 0.4604 | 0.0669 | 0.6395 | 0.037  | 0.0005 |
| PC aa C40:3 | 0.9679 | 0.1601 | 1.1464 | 0.2486 | NS     | 0.7646 | 0.1327 | 0.9689 | 0.0896 | 0.0171 |
| PC aa C40:4 | 2.0057 | 0.1995 | 2.2823 | 0.3309 | NS     | 1.5575 | 0.2158 | 1.69   | 0.1598 | NS     |
| PC aa C40:5 | 2.9758 | 0.5594 | 2.8755 | 0.7497 | NS     | 2.118  | 0.4302 | 1.7351 | 0.2034 | NS     |
| PC aa C40:6 | 28.762 | 4.8445 | 33.983 | 7.8407 | NS     | 23.002 | 6.3151 | 22.479 | 1.7257 | NS     |
| PC aa C42:0 | 0.1377 | 0.0219 | 0.1456 | 0.0142 | NS     | 0.137  | 0.0222 | 0.1499 | 0.0104 | NS     |
| PC aa C42:1 | 0.1332 | 0.0258 | 0.1341 | 0.0205 | NS     | 0.1089 | 0.0123 | 0.1466 | 0.0259 | 0.0112 |
| PC aa C42:2 | 0.4081 | 0.0643 | 0.483  | 0.0812 | NS     | 0.3696 | 0.0516 | 0.4414 | 0.0483 | 0.0421 |
| PC aa C42:4 | 0.2185 | 0.0293 | 0.2912 | 0.0573 | 0.0198 | 0.1917 | 0.0259 | 0.2393 | 0.0142 | 0.0053 |
| PC aa C42:5 | 0.3262 | 0.0247 | 0.403  | 0.1033 | NS     | 0.2718 | 0.0456 | 0.2965 | 0.0437 | NS     |
| PC aa C42:6 | 1.6687 | 0.1928 | 2.1737 | 0.5108 | NS     | 1.3127 | 0.291  | 1.5295 | 0.0786 | NS     |
| PC ae C30:0 | 0.1938 | 0.0558 | 0.2213 | 0.0511 | NS     | 0.2074 | 0.0334 | 0.2104 | 0.0576 | NS     |
| PC ae C30:1 | 0.1521 | 0.028  | 0.1676 | 0.027  | NS     | 0.1394 | 0.0202 | 0.1639 | 0.017  | NS     |
| PC ae C30:2 | 0.224  | 0.0178 | 0.218  | 0.0075 | NS     | 0.2142 | 0.0188 | 0.2231 | 0.023  | NS     |
| PC ae C32:1 | 0.4478 | 0.0225 | 0.5001 | 0.0493 | 0.0397 | 0.4417 | 0.0645 | 0.5313 | 0.0241 | 0.0171 |
| PC ae C32:2 | 0.2922 | 0.0413 | 0.3342 | 0.0586 | NS     | 0.2889 | 0.0517 | 0.3581 | 0.0308 | 0.0279 |
| PC ae C34:0 | 0.7187 | 0.0745 | 0.7917 | 0.0979 | NS     | 0.7012 | 0.0797 | 0.9528 | 0.0806 | 0.0006 |
| PC ae C34:1 | 2.6322 | 0.2662 | 2.6088 | 0.3478 | NS     | 2.4257 | 0.4099 | 2.3668 | 0.0687 | NS     |
| PC ae C34:2 | 3.9002 | 0.4    | 4.4973 | 0.7079 | NS     | 3.76   | 0.5421 | 5.0285 | 0.3373 | 0.0014 |
| PC ae C34:3 | 1.3665 | 0.0758 | 1.5623 | 0.288  | NS     | 1.3244 | 0.2466 | 1.7168 | 0.0756 | 0.0079 |
| PC ae C36:0 | 0.8662 | 0.0936 | 0.8089 | 0.1077 | NS     | 0.7985 | 0.1388 | 0.9261 | 0.0411 | NS     |
| PC ae C36:1 | 3.35   | 0.3688 | 3.165  | 0.4952 | NS     | 2.7425 | 0.6376 | 3.1135 | 0.4046 | NS     |
| PC ae C36:2 | 8.439  | 1.5106 | 9.3508 | 2.0102 | NS     | 8.3855 | 1.1415 | 10.711 | 1.0351 | 0.0067 |
| PC ae C36:3 | 2.7943 | 0.2686 | 3.0678 | 0.4874 | NS     | 2.4968 | 0.3909 | 3.0763 | 0.2152 | 0.0163 |
| PC ae C36:4 | 2.3653 | 0.3505 | 2.555  | 0.3842 | NS     | 2.8238 | 0.3241 | 3.4833 | 0.188  | 0.0031 |
| PC ae C36:5 | 2.1203 | 0.2657 | 2.2335 | 0.3376 | NS     | 2.3618 | 0.4391 | 2.7611 | 0.1589 | NS     |
| PC ae C38:0 | 2.4443 | 0.3291 | 2.5148 | 0.4317 | NS     | 1.8588 | 0.4786 | 1.8636 | 0.3731 | NS     |
| PC ae C38:1 | 1.4958 | 0.2439 | 1.5313 | 0.2885 | NS     | 1.307  | 0.2384 | 1.4818 | 0.0563 | NS     |

|             |        |        |        |        |        |        |        |        |        |        |
|-------------|--------|--------|--------|--------|--------|--------|--------|--------|--------|--------|
| PC ae C38:2 | 7.0845 | 1.5694 | 7.2058 | 2.0632 | NS     | 7.431  | 1.4934 | 9.5854 | 1.2434 | 0.0305 |
| PC ae C38:3 | 1.7868 | 0.3217 | 1.7812 | 0.3883 | NS     | 1.6232 | 0.2162 | 1.8157 | 0.2142 | NS     |
| PC ae C38:4 | 2.1525 | 0.2772 | 2.3052 | 0.3314 | NS     | 2.1563 | 0.2544 | 2.4833 | 0.215  | 0.0492 |
| PC ae C38:5 | 2.7713 | 0.3668 | 3.0087 | 0.4107 | NS     | 2.9373 | 0.4489 | 3.597  | 0.2034 | 0.0145 |
| PC ae C38:6 | 2.5725 | 0.2583 | 2.9133 | 0.4273 | NS     | 2.7878 | 0.4443 | 3.3062 | 0.1487 | 0.0352 |
| PC ae C40:1 | 2.2137 | 0.1092 | 2.679  | 0.3077 | 0.0058 | 1.6832 | 0.3184 | 2.1289 | 0.2531 | 0.0323 |
| PC ae C40:2 | 0.7901 | 0.0683 | 0.8216 | 0.1186 | NS     | 0.6369 | 0.1295 | 0.7072 | 0.0521 | NS     |
| PC ae C40:3 | 0.8234 | 0.1221 | 0.8204 | 0.1451 | NS     | 0.6738 | 0.1071 | 0.7557 | 0.0949 | NS     |
| PC ae C40:4 | 1.1998 | 0.1785 | 1.2831 | 0.2708 | NS     | 1.117  | 0.1322 | 1.2611 | 0.1244 | NS     |
| PC ae C40:5 | 1.521  | 0.21   | 1.6442 | 0.2643 | NS     | 1.3473 | 0.2226 | 1.5657 | 0.0866 | NS     |
| PC ae C40:6 | 2.2543 | 0.176  | 2.525  | 0.1606 | 0.0194 | 1.9383 | 0.3981 | 2.1363 | 0.1532 | NS     |
| PC ae C42:0 | 1.4083 | 0.1481 | 1.5288 | 0.191  | NS     | 1.1837 | 0.1114 | 1.1716 | 0.0933 | NS     |
| PC ae C42:1 | 0.4001 | 0.052  | 0.4901 | 0.0637 | 0.023  | 0.3243 | 0.0405 | 0.3573 | 0.0363 | NS     |
| PC ae C42:2 | 0.4269 | 0.0605 | 0.4578 | 0.0754 | NS     | 0.3183 | 0.0571 | 0.3538 | 0.0341 | NS     |
| PC ae C42:3 | 0.7422 | 0.0896 | 0.8314 | 0.118  | NS     | 0.5485 | 0.1242 | 0.5884 | 0.0938 | NS     |
| PC ae C42:4 | 0.2187 | 0.0303 | 0.238  | 0.0311 | NS     | 0.1841 | 0.0409 | 0.2107 | 0.0363 | NS     |
| PC ae C42:5 | 0.9613 | 0.0907 | 1.0369 | 0.094  | NS     | 0.9004 | 0.0798 | 0.9467 | 0.0312 | NS     |
| PC ae C44:3 | 0.0779 | 0.0084 | 0.0906 | 0.0072 | 0.0185 | 0.0663 | 0.0134 | 0.0759 | 0.0088 | NS     |
| PC ae C44:4 | 0.1161 | 0.0123 | 0.1167 | 0.0103 | NS     | 0.1029 | 0.0138 | 0.1102 | 0.0086 | NS     |
| PC ae C44:5 | 0.2083 | 0.0197 | 0.2751 | 0.0462 | 0.0086 | 0.173  | 0.0371 | 0.2179 | 0.0261 | 0.0494 |
| PC ae C44:6 | 0.1573 | 0.0179 | 0.1879 | 0.0244 | 0.0323 | 0.155  | 0.026  | 0.1851 | 0.0247 | NS     |

### Sphingomyelins ( $\mu\text{M}$ )

|                 | Ctrl (ZT4, n=6) |        | cKO (ZT4, n=6) |        | p (t-test) | Ctrl (ZT16, n=6) |        | cKO (ZT16, n=6) |        | p (t-test) |
|-----------------|-----------------|--------|----------------|--------|------------|------------------|--------|-----------------|--------|------------|
|                 | mean            | SD     | mean           | SD     |            | mean             | SD     | mean            | SD     |            |
| <b>SM (OH)</b>  |                 |        |                |        |            |                  |        |                 |        |            |
| <b>C14:1</b>    | 0.8131          | 0.1242 | 0.7746         | 0.1751 | NS         | 0.8452           | 0.0623 | 1.0112          | 0.0962 | 0.0071     |
| <b>SM (OH)</b>  |                 |        |                |        |            |                  |        |                 |        |            |
| <b>C16:1</b>    | 0.2355          | 0.0301 | 0.2599         | 0.0508 | NS         | 0.2544           | 0.032  | 0.3082          | 0.0344 | 0.0249     |
| <b>SM (OH)</b>  |                 |        |                |        |            |                  |        |                 |        |            |
| <b>C22:1</b>    | 1.7232          | 0.435  | 1.7837         | 0.3141 | NS         | 1.4269           | 0.3944 | 1.9829          | 0.3373 | 0.0349     |
| <b>SM (OH)</b>  |                 |        |                |        |            |                  |        |                 |        |            |
| <b>C22:2</b>    | 2.0005          | 0.24   | 1.9558         | 0.3579 | NS         | 1.675            | 0.317  | 2.1369          | 0.2845 | 0.0329     |
| <b>SM (OH)</b>  |                 |        |                |        |            |                  |        |                 |        |            |
| <b>C24:1</b>    | 0.2858          | 0.0352 | 0.3218         | 0.0553 | NS         | 0.267            | 0.0496 | 0.2752          | 0.043  | NS         |
| <b>SM C16:0</b> | 14.902          | 1.208  | 16.43          | 0.9823 | 0.037      | 15.43            | 1.0112 | 18.582          | 2.1249 | 0.0101     |
| <b>SM C16:1</b> | 2.887           | 0.5226 | 3.3677         | 0.5409 | NS         | 2.4955           | 0.5353 | 3.4462          | 0.3312 | 0.0074     |
| <b>SM C18:0</b> | 0.9438          | 0.1505 | 1.1823         | 0.0981 | 0.0087     | 1.0281           | 0.0709 | 1.434           | 0.2368 | 0.003      |
| <b>SM C18:1</b> | 0.5099          | 0.043  | 0.63           | 0.0393 | 0.0005     | 0.5258           | 0.0635 | 0.6921          | 0.0875 | 0.0053     |
| <b>SM C20:2</b> | 0.0392          | 0.0115 | 0.0405         | 0.0188 | NS         | 0.044            | 0.0161 | 0.04            | 0.0127 | NS         |
| <b>SM C22:3</b> | 0               | 0      | 0              | 0      | NS         | 0.0037           | 0.0091 | 0               | 0      | NS         |
| <b>SM C24:0</b> | 10.661          | 1.2221 | 12.935         | 1.725  | 0.025      | 9.6673           | 2.0557 | 11.011          | 0.8308 | NS         |
| <b>SM C24:1</b> | 16.807          | 2.3727 | 19.977         | 2.7287 | NS         | 15.153           | 1.6983 | 19.621          | 2.343  | 0.0052     |
| <b>SM C26:0</b> | 0.0249          | 0.033  | 0.0377         | 0.0121 | NS         | 0.065            | 0.0162 | 0.0747          | 0.0267 | NS         |
| <b>SM C26:1</b> | 0.0333          | 0.041  | 0.0525         | 0.046  | NS         | 0.0363           | 0.0291 | 0.0239          | 0.0194 | NS         |

### Hexoses ( $\mu\text{M}$ )

| Ctrl (ZT4, n=6) |        | cKO (ZT4, n=6) |        | p (t-test) | Ctrl (ZT16, n=6) |        | cKO (ZT16, n=6) |        | p (t-test) |
|-----------------|--------|----------------|--------|------------|------------------|--------|-----------------|--------|------------|
| mean            | SD     | mean           | SD     |            | mean             | SD     | mean            | SD     |            |
| 17744           | 5934.4 | 16679          | 5784.4 | NS         | 16306            | 4194.8 | 17205           | 2538.5 | NS         |
